# Supplementary material for: Aromatic interactions with membrane modulate human BK channel activation
Source: eLife. 2020 Jun 29;9:e55571. doi: 10.7554/eLife.55571 (PMC7371421; doi:10.7554/eLife.55571)
Supplement: Figure 1—source data 1. [file elife-55571-fig1-data1.xlsx]

## Sheet: FIGURE 1
WT 0C0M					K0 0C0M				K2 0C0M				K7 0C0M
	Voltage	Po	SEM		Voltage	Po	SEM		Voltage	Po	SEM		Voltage	Po	SEM
	-30	0.00501259	0.0025678		-150	0.00267666	0.000390522		-30	0.00250144	0.0011915		-80	0.0192179	0.0152712
	-20	0.0049744	0.00279		-140	0.01613	0.0122052		-20	0.00368687	0.000364543		-70	0.0085252	0.00319404
	-10	0.00547451	0.00188349		-130	0.0423812	0.00422001		-10	0.00388779	0.000443153		-60	0.0217715	0.00697631
	0	0.0128392	0.00506749		-120	0.0042147	0.00122161		0	0.00293056	0.000637951		-50	0.0232985	0.00837597
	10	-0.00110297	0.00869908		-110	0.0194449	0.00528455		10	0.00385993	0.000921329		-40	0.03086	0.00695258
	20	0.0102418	0.00296848		-100	0.0280776	0.00584763		20	0.00405278	0.000904369		-30	0.0292171	0.00923994
	30	0.00540972	0.00216482		-90	0.0384497	0.0109228		30	0.00409574	0.000756826		-20	0.0645508	0.0173703
	40	0.00541399	0.00210193		-80	0.0100134	0.00804104		40	0.00548602	0.0012426		-10	0.0637184	0.0160526
	50	0.00540083	0.00173578		-70	0.0270014	0.0047255		50	0.00473409	0.000949409		0	0.133337	0.0195115
	60	0.00578739	0.00181785		-60	0.0496625	0.00972466		60	0.00604119	0.00115052		10	0.179449	0.0198366
	70	0.00484622	0.00260384		-50	0.0464148	0.00814924		70	0.00610622	0.00156015		20	0.265535	0.0372217
	80	0.00599685	0.00178965		-40	0.0536791	0.00660518		80	0.00630999	0.00141743		30	0.334345	0.0407273
	90	0.00589704	0.00262635		-30	0.0546096	0.0111851		90	0.0131583	0.00242685		40	0.388883	0.0354243
	100	0.0148383	0.00669018		-20	0.117199	0.0214717		100	0.0259519	0.00414412		50	0.499352	0.0590159
	110	0.0229699	0.0108381		-10	0.126893	0.0285362		110	0.039699	0.00469641		60	0.641228	0.0423244
	120	0.070321	0.0164767		0	0.181116	0.029829		120	0.0535979	0.00310534		70	0.693099	0.0449705
	130	0.103922	0.0407675		10	0.194708	0.0315447		130	0.0912815	0.00625933		80	0.777925	0.0368271
	140	0.169299	0.0219132		20	0.25195	0.0379876		140	0.110886	0.0114955		90	0.79384	0.0358637
	150	0.277617	0.00512709		30	0.313475	0.0496547		150	0.182615	0.011993		100	0.890977	0.0283295
	160	0.332323	0.024441		40	0.36911	0.0493896		160	0.228322	0.0180207		110	0.906105	0.0266102
	170	0.409346	0.0271908		50	0.439564	0.0577079		170	0.308639	0.0207024		120	0.956713	0.0233715
	180	0.508631	0.0305921		60	0.484187	0.0525553		180	0.372389	0.0185791		130	0.954718	0.0302603
	190	0.581688	0.0227255		70	0.531743	0.0519884		190	0.441823	0.0152788		140	0.998311	0.017818
	200	0.693256	0.0407279		80	0.603167	0.0523979		200	0.557534	0.0170368		150	0.9891	0.0199218
	210	0.776596	0.0367834		90	0.636476	0.04786		210	0.618235	0.0196197		160	0.989686	0.00576213
	220	0.846555	0.0282625		100	0.718329	0.0516001		220	0.729383	0.018363		170	0.966487	0.0197922
	230	0.869049	0.0045783		110	0.736872	0.0441021		230	0.744254	0.037726		180	1.00042	0.0264484
	240	0.939929	0.017003		120	0.786315	0.037837		240	0.857975	0.0246856		190	1.00316	0.0130014
	250	0.921223	0.0617429		130	0.802016	0.0322585		250	0.89347	0.0110631		200	0.953826	0.0177804
					140	0.847979	0.0310996
					150	0.907618	0.031372
					160	0.91411	0.0208398
					170	0.937962	0.0202191
					180	0.980022	0.0152572
					190	0.995822	0.0221318
					200	0.976631	0.00823738
