# Supplementary material for: Aromatic interactions with membrane modulate human BK channel activation
Source: eLife. 2020 Jun 29;9:e55571. doi: 10.7554/eLife.55571 (PMC7371421; doi:10.7554/eLife.55571)
Supplement: Figure 1—source data 2. [file elife-55571-fig1-data2.xlsx]

## Sheet: FIGURE 1
		K0 0C0M QV				WT 0C0M QV
		Voltage	Qon	SEM		Voltage	Qon	SEM
		-80	-0.0136958	0.0291312		-80	-0.00425628	0.0190867
		-70	0.010967	0.0134224		-70	0.0124967	0.0142852
		-60	0.00683004	0.013338		-60	0.0453632	0.0249626
		-50	-0.0167339	0.0201006		-50	0.0120987	0.00653574
		-40	0.0212007	0.00749542		-40	0.0130085	0.0166134
		-30	0.0167824	0.0253626		-30	0.0206558	0.00375889
		-20	0.052095	0.0364707		-20	0.0456337	0.0159344
		-10	0.030423	0.00362733		-10	0.0252192	0.00811393
		0	0.0337655	0.0347613		0	0.0278875	0.00983838
		10	0.0854734	0.00457904		10	0.0389367	0.0124281
		20	0.00790725	0.0199092		20	0.0546313	0.0131624
		30	0.0636427	0.0313905		30	0.0666519	0.0120041
		40	0.054461	0.0246447		40	0.0794	0.0141976
		50	0.1328	0.0179493		50	0.10062	0.0119517
		60	0.0951309	0.0554959		60	0.156903	0.0272642
		70	0.14607	0.0307671		70	0.157209	0.0184767
		80	0.155963	0.05618		80	0.15153	0.0124021
		90	0.219562	0.0217835		90	0.206082	0.0161019
		100	0.257632	0.00454708		100	0.239749	0.0137699
		110	0.245316	0.0598039		110	0.281824	0.0107751
		120	0.301126	0.051607		120	0.274451	0.0138625
		130	0.35	0.0184229		130	0.353896	0.00963559
		140	0.420355	0.0307671		140	0.391253	0.0143199
		150	0.47265	0.008987		150	0.460968	0.0219774
		160	0.490644	0.042213		160	0.520491	0.0324041
		170	0.516282	0.00992926		170	0.56502	0.0196921
		180	0.569018	0.0728467		180	0.604546	0.024197
		190	0.606516	0.0383092		190	0.667668	0.0382696
		200	0.727008	0.0558113		200	0.692723	0.0230918
		210	0.820008	0.0152234		210	0.738557	0.0289429
		220	0.728004	0.0435238		220	0.739282	0.0232494
		230	0.789275	0.0218022		230	0.810382	0.0302207
		240	0.831368	0.00113453		240	0.818007	0.0371607
		250	0.875059	0.0519215		250	0.85387	0.0283243
		260	0.813898	0.0528032		260	0.916192	0.0453514
		270	0.87	0.025654		270	0.895412	0.017828
		280	0.908177	0.0439645		280	0.944544	0.0190127
		290	0.914748	0.0566098		290	0.89586	0.00195923
		300	0.9403	0.03267		300	0.908726	0.0116729
