# Supplementary material for: Aromatic interactions with membrane modulate human BK channel activation
Source: eLife. 2020 Jun 29;9:e55571. doi: 10.7554/eLife.55571 (PMC7371421; doi:10.7554/eLife.55571)
Supplement: Figure 2—source data 1. [file elife-55571-fig2-data1.xlsx]

## Sheet: FIGURE 2
section a	C-linker N-C Ca distance
#Time (ns)	Metal-free	Metal-bound
0	30.7694	29.4298
1	30.4192	29.8534
2	30.3887	31.2332
3	29.9195	29.8808
4	30.9242	30.2477
5	30.6754	30.254
6	30.8347	30.5758
7	30.782	30.3702
8	30.5519	30.3662
9	30.6048	30.289
10	30.9734	29.8373
11	30.7201	29.9558
12	30.9014	29.8328
13	31.0428	29.6888
14	30.8183	29.996
15	31.5041	29.8233
16	30.9749	29.728
17	30.6203	29.3265
18	30.5948	29.7531
19	30.5701	29.9222
20	30.6348	29.8276
21	30.7434	30.1164
22	30.8284	29.6059
23	31.3222	29.6628
24	31.3845	29.7515
25	31.145	29.7893
26	31.8004	29.9811
27	31.4283	30.1655
28	30.7998	29.6397
29	30.8051	29.795
30	30.8687	29.7178
31	31.1066	29.8161
32	30.6345	29.8407
33	30.9354	30.0738
34	31.0191	29.8404
35	30.979	30.2579
36	30.9754	29.603
37	31.1686	30.0702
38	31.0944	30.519
39	30.8465	30.2978
40	30.8765	29.9698
41	30.8731	29.6922
42	30.5981	30.0958
43	30.7097	30.5635
44	31.1979	30.3871
45	30.8494	30.5841
46	30.5114	30.7644
47	30.8053	30.8275
48	30.3761	30.4335
49	30.4554	30.8883
50	30.3124	30.3172
51	30.6494	30.5148
52	30.7198	30.7387
53	30.9691	30.9276
54	31.1559	30.6604
55	31.2723	31.0681
56	31.0798	31.2458
57	30.9669	31.1734
58	30.9824	30.5442
59	30.7592	30.8003
60	31.0876	29.9013
61	31.1471	30.0057
62	30.8565	30.0229
63	30.9931	30.4355
64	31.3462	30.4319
65	31.0135	30.5953
66	30.9625	30.615
67	30.9007	30.7432
68	30.5092	30.2845
69	30.7206	30.1629
70	31.035	30.4461
71	30.849	30.3035
72	30.8715	29.8938
73	30.8551	30.6001
74	30.9708	30.4638
75	30.7937	30.4827
76	30.4027	30.5002
77	30.6691	30.8193
78	30.9308	30.8384
79	31.0121	30.9469
80	30.6727	30.7545
81	30.9007	30.9845
82	30.5851	30.8812
83	30.7673	30.7812
84	30.9315	30.7813
85	30.9569	30.5514
86	30.5393	29.9426
87	30.4654	30.8336
88	30.7073	30.5158
89	30.6012	30.4748
90	30.1947	30.3572
91	30.6701	30.3049
92	30.5932	30.1655
93	30.6175	30.6258
94	30.3785	30.7571
95	30.5079	30.2159
96	30.5504	30.7437
97	30.4289	30.8183
98	30.4987	30.3181
99	30.4595	30.4252
100	29.8907	30.2937
101	30.5992	30.389
102	30.7556	30.2696
103	30.559	30.2144
104	30.5839	30.39
105	30.6675	30.2453
106	30.6007	30.0723
107	30.3162	30.4942
108	30.904	30.2448
109	30.3019	29.7507
110	31.0434	30.1016
111	30.559	30.391
112	30.4875	30.3154
113	30.8403	30.2907
114	30.7374	30.2286
115	30.9395	30.4446
116	30.2808	30.2373
117	30.8973	30.848
118	30.3397	30.2212
119	30.441	30.3531
120	30.6217	30.3811
121	30.8481	30.0719
122	31.346	30.8209
123	31.0763	30.4703
124	31.4542	30.5867
125	31.6548	30.4632
126	31.2212	30.5066
127	31.2103	30.3579
128	31.0204	30.146
129	30.6814	30.844
130	30.1631	30.6503
131	30.382	30.2754
132	30.5374	30.3933
133	30.2235	30.3106
134	30.5869	30.7617
135	30.7035	30.7964
136	30.7826	30.7988
137	30.4874	30.6805
138	30.526	30.6498
139	30.5216	30.404
140	30.7483	30.5384
141	30.4768	31.0567
142	30.5014	30.3423
143	30.3542	30.5766
144	31.1111	30.1708
145	30.4546	30.3402
146	30.2314	30.4833
147	31.6304	30.4889
148	31.0539	30.5369
149	30.7065	30.5359
150	30.8278	30.0567
151	30.7626	30.068
152	30.7371	30.361
153	30.4358	30.4292
154	30.3856	30.0714
155	29.8881	30.3474
156	30.7842	30.3514
157	31.1521	29.9887
158	30.7554	30.1282
159	30.3541	29.9509
160	30.9656	30.0202
161	30.7236	29.7372
162	30.4682	30.1504
163	30.5104	30.0562
164	30.8295	30.3862
165	30.2247	30.4628
166	30.7655	30.5482
167	30.717	30.7453
168	30.671	30.4648
169	30.585	30.4769
170	30.7685	30.4181
171	30.5497	30.2516
172	30.6395	30.4171
173	30.3577	30.4886
174	30.2635	29.8143
175	31.0178	30.5308
176	30.3752	30.6805
177	30.4926	30.4549
178	30.5559	30.1581
179	30.7858	30.4974
180	30.6062	30.438
181	30.5405	30.5617
182	30.8666	30.6255
183	30.7445	30.735
184	30.1202	30.0352
185	30.6484	30.6974
186	30.5064	30.8096
187	30.6031	30.498
188	30.1892	30.4531
189	30.2339	30.3697
190	30.2884	30.5814
191	30.8454	29.8291
192	30.4574	30.7224
193	30.336	30.7795
194	30.8685	30.4731
195	30.7832	30.7
196	30.5799	30.6475
197	30.4069	30.2816
198	30.5744	30.4056
199	30.8067	30.0182
200	30.7389	30.0054
201	30.6575	30.0482
202	30.7815	30.2988
203	30.7801	30.8471
204	30.3241	30.3933
205	30.2349	30.364
206	30.6261	30.4207
207	30.1736	30.2358
208	30.3672	30.3282
209	30.5158	30.4004
210	29.952	30.3037
211	30.8709	30.2732
212	30.3941	30.3345
213	30.6178	30.568
214	30.6276	30.3492
215	29.9441	30.2988
216	30.6496	30.0587
217	30.5332	30.4769
218	30.2032	30.1879
219	30.226	30.1763
220	30.3125	30.5608
221	30.0945	30.0328
222	30.5735	30.2775
223	30.4209	30.3785
224	30.5822	30.1237
225	30.7805	30.8776
226	30.4192	30.497
227	30.3721	29.9683
228	30.4401	29.9242
229	30.667	30.5788
230	30.2291	30.6939
231	30.6168	29.963
232	30.5775	30.9969
233	30.3081	31.0957
234	30.5265	30.5943
235	30.6746	30.7049
236	30.5823	30.5026
237	30.3317	30.6777
238	30.598	30.36
239	30.5617	30.1692
240	30.7726	30.0024
241	30.2888	30.0416
242	30.4129	30.2514
243	30.0387	30.1387
244	30.3558	30.1542
245	30.0232	30.0266
246	30.2442	30.337
247	30.2163	30.1317
248	30.4415	30.2264
249	30.1084	30.0696
250	29.7787	30.244
251	29.7273	30.2099
252	30.0259	30.4526
253	30.5223	30.2894
254	30.3881	30.522
255	30.04	30.6085
256	30.7336	30.3894
257	30.269	30.2027
258	30.1783	30.0746
259	30.7651	30.1877
260	30.8551	29.8617
261	30.9753	30.1544
262	30.8805	30.5426
263	30.5319	30.5514
264	29.9784	30.4342
265	30.0223	30.0263
266	30.3307	29.7932
267	30.4354	30.2117
268	30.8167	30.4976
269	30.6954	29.5597
270	30.7033	30.5861
271	29.8188	30.458
272	30.5583	30.1919
273	30.6137	30.5307
274	30.468	30.1638
275	30.5573	30.0011
276	31.0822	29.7445
277	30.6529	29.798
278	30.7098	30.1849
279	30.448	30.1676
280	30.2057	30.2574
281	30.5586	29.8847
282	30.1157	29.9505
283	30.1021	29.9579
284	30.0345	30.187
285	30.7052	30.0209
286	30.1582	29.9958
287	30.242	30.4013
288	30.1058	30.1776
289	30.7131	29.9859
290	30.925	30.4644
291	30.7566	30.0302
292	30.3975	30.017
293	30.1912	30.3567
294	30.1575	30.2861
295	30.4873	30.6898
296	30.6682	30.6736
297	30.5089	30.5468
298	30.0772	30.1679
299	30.318	30.3556
300	30.6616	30.0054
301	30.0968	30.0482
302	29.9574	30.2988
303	30.2045	30.8471
304	30.2322	30.3933
305	30.2585	30.364
306	30.5354	30.4207
307	29.9478	30.2358
308	29.7952	30.3282
309	29.8533	30.4004
310	30.349	30.3037
311	30.2807	30.2732
312	30.0087	30.3345
313	30.4304	30.568
314	30.3357	30.3492
315	30.4885	30.2988
316	30.4038	30.0587
317	30.2651	30.4769
318	30.4407	30.1879
319	30.4905	30.1763
320	30.4049	30.5608
321	30.1848	30.0328
322	30.6293	30.2775
323	30.8338	30.3785
324	30.4843	30.1237
325	31.3749	30.8776
326	30.664	30.497
327	31.0135	29.9683
328	30.9887	29.9242
329	30.5703	30.5788
330	30.471	30.6939
331	30.6629	29.963
332	30.6766	30.9969
333	30.223	31.0957
334	30.6197	30.5943
335	30.5426	30.7049
336	30.1187	30.5026
337	30.6312	30.6777
338	30.6291	30.36
339	30.9595	30.1692
340	30.3006	30.0024
341	30.3049	30.0416
342	30.5376	30.2514
343	30.7329	30.1387
344	30.3853	30.1542
345	30.1503	30.0266
346	30.5654	30.337
347	30.8992	30.1317
348	30.7402	30.2264
349	31.2636	30.0696
350	30.5964	30.244
351	30.5386	30.2099
352	30.8965	30.4526
353	30.6137	30.2894
354	30.9603	30.522
355	30.8584	30.6085
356	30.8225	30.3894
357	31.0529	30.2027
358	30.9037	30.0746
359	30.9197	30.1877
360	31.2715	29.8617
361	31.1047	30.1544
362	31.0979	30.5426
363	30.91	30.5514
364	31.0743	30.4342
365	30.9439	30.0263
366	30.488	29.7932
367	30.9418	30.2117
368	30.7672	30.4976
369	31.1427	29.5597
370	30.6515	30.5861
371	30.9678	30.458
372	30.2106	30.1919
373	30.7676	30.5307
374	31.1727	30.1638
375	31.0804	30.0011
376	30.8615	29.7445
377	30.9682	29.798
378	31.0852	30.1849
379	30.516	30.1676
380	30.7252	30.2574
381	30.3116	29.8847
382	30.3884	29.9505
383	30.2384	29.9579
384	30.6001	30.187
385	30.7235	30.0209
386	30.4668	29.9958
387	30.7216	30.4013
388	30.611	30.1776
389	30.3795	29.9859
390	30.761	30.4644
391	30.5326	30.0302
392	30.715	30.017
393	30.9922	30.3567
394	30.9849	30.2861
395	30.4749	30.6898
396	30.6649	30.6736
397	30.6835	30.5468
398	30.6181	30.1679
399	30.4624	30.3556
400	30.542	30.4795
401	30.1651	30.515
402	30.4569	30.1054
403	30.0444	30.117
404	29.8834	30.2835
405	30.5991	30.3991
406	30.2688	30.1791
407	30.8415	30.0565
408	30.7295	30.3014
409	30.5217	29.8511
410	30.7598	30.3632
411	31.0628	30.3501
412	30.3032	30.2372
413	30.6723	30.198
414	30.2203	30.3322
415	30.6472	29.9893
416	30.5238	29.8806
417	30.8344	30.0503
418	30.7039	29.9217
419	30.6798	30.017
420	30.7857	30.2436
421	30.7652	30.1938
422	30.6718	29.972
423	30.5829	29.8456
424	30.6414	30.2717
425	30.8894	29.6716
426	30.676	29.9469
427	30.8033	30.198
428	30.7421	30.3615
429	30.5112	29.9534
430	30.7812	29.8651
431	30.6236	30.2714
432	30.4926	29.9835
433	30.7706	30.2135
434	31.2506	30.1266
435	30.356	30.1479
436	30.4072	30.4259
437	30.6597	30.1832
438	30.6569	30.2959
439	30.6815	29.9588
440	30.7348	30.4557
441	30.8849	29.7964
442	30.727	29.9059
443	30.8377	30.0739
444	31.2293	30.216
445	31.6791	29.8688
446	31.1257	29.9773
447	30.9444	29.6914
448	30.9066	30.1599
449	31.0725	29.8375
450	31.1311	30.1164
451	31.0263	30.1872
452	30.4908	30.2037
453	29.8812	30.2977
454	30.1778	30.109
455	30.3952	30.345
456	30.1415	30.7751
457	30.8683	30.3091
458	30.7168	30.05
459	30.3551	30.6302
460	30.3604	30.2667
461	30.5813	30.1108
462	30.6847	29.802
463	30.5774	30.1676
464	30.8336	30.4593
465	30.3704	30.8045
466	30.8173	30.6594
467	30.2823	30.2756
468	30.8561	30.3193
469	30.54	30.1829
470	30.6785	29.9437
471	30.4385	30.5335
472	30.7294	30.1531
473	30.4262	30.3989
474	30.5807	30.0665
475	30.3845	30.2784
476	30.3572	30.1916
477	30.7373	30.178
478	30.7262	30.3627
479	30.2441	30.1909
480	30.4848	29.8952
481	30.775	30.6326
482	30.8752	30.4389
483	30.488	30.3507
484	29.945	30.6037
485	30.2392	30.575
486	30.3836	30.3156
487	30.3899	30.4545
488	30.0498	30.6007
489	30.4331	30.2999
490	30.3702	30.5572
491	30.9433	29.9894
492	30.1764	30.1145
493	30.6416	29.9451
494	30.2072	30.1831
495	30.1639	30.3326
496	30.9701	30.5896
497	30.4456	30.4446
498	30.3612	30.4247
499	30.8158	30.2261
500	30.2006	30.5776
501	30.6735	29.8602
502	30.7632	30.0197
503	30.6221	30.1644
504	30.6781	30.3891
505	30.4817	29.9724
506	30.9464	30.1753
507	30.7028	30.3613
508	30.5228	30.5488
509	30.5075	30.7968
510	30.8506	30.42
511	30.7429	30.4848
512	30.961	30.5842
513	30.9728	30.5113
514	31.1251	30.2822
515	31.09	30.5292
516	30.8618	30.7052
517	30.9874	30.8196
518	30.77	30.482
519	30.6825	30.6418
520	30.3705	30.6136
521	31.1612	30.4633
522	30.7343	30.6971
523	30.5862	30.2663
524	30.6812	30.5602
525	30.4119	30.5117
526	30.5527	30.4963
527	30.5932	30.4098
528	30.8118	30.6811
529	30.7582	30.1236
530	30.6962	30.3441
531	30.7918	30.131
532	30.8355	31.0701
533	30.8706	30.3965
534	30.8943	30.8811
535	30.5178	30.4622
536	30.5695	30.2961
537	30.7561	30.3802
538	30.4289	30.3787
539	30.8624	30.3778
540	30.7267	30.5407
541	30.6973	30.4347
542	30.9669	30.4134
543	30.6931	30.672
544	30.5069	30.3907
545	30.6605	30.4108
546	31.2375	30.6368
547	30.8556	30.3248
548	31.2115	30.5068
549	30.817	30.6742
550	30.8551	30.898
551	31.0309	30.7662
552	31.2343	30.7022
553	30.5568	30.346
554	31.1707	30.2644
555	30.8206	30.4637
556	30.7904	30.6767
557	30.2319	30.431
558	30.7666	30.2594
559	30.9126	30.0275
560	30.5689	29.8983
561	31.163	30.318
562	30.988	30.5451
563	30.8791	29.8541
564	31.3557	30.1144
565	31.5335	29.9598
566	31.0513	30.433
567	31.4125	29.9568
568	31.4033	30.1918
569	31.649	30.1955
570	31.3828	30.019
571	31.0706	30.0508
572	31.2205	30.081
573	30.6236	30.8123
574	31.4076	30.2163
575	30.7828	30.3726
576	30.9897	30.1214
577	31.2257	29.9119
578	31.3237	30.0293
579	31.2769	30.0211
580	31.0283	30.3147
581	30.7802	30.5162
582	31.1505	30.1862
583	31.3605	30.2088
584	31.3601	29.9142
585	31.4156	29.967
586	31.4392	29.6704
587	31.2139	30.1663
588	31.0478	30.4255
589	30.9325	30.6129
590	30.5955	29.8653
591	30.8963	30.0116
592	31.1723	29.9473
593	31.2313	30.4081
594	31.0337	30.3593
595	30.5778	29.9362
596	30.7574	30.3056
597	30.911	30.5921
598	31.082	30.4937
599	30.5128	30.6425
600	30.7878	30.7789
601	30.8509	30.2797
602	30.9831	29.8078
603	31.0263	30.106
604	31.2197	30.125
605	30.6115	30.1172
606	30.7423	30.2272
607	31.1154	30.3842
608	30.8978	30.2069
609	30.7541	30.0871
610	30.9248	30.1447
611	30.8471	29.9987
612	30.841	29.9132
613	30.9158	30.4189
614	31.3001	30.3397
615	30.9985	30.1169
616	30.7369	30.2759
617	31.1145	29.9189
618	30.9462	29.8632
619	30.7158	29.8992
620	30.619	29.8794
621	30.9989	29.9637
622	30.7026	29.7472
623	30.8651	30.4964
624	30.708	30.0495
625	30.9887	30.1105
626	31.0988	30.1275
627	30.8981	30.075
628	31.2035	29.8293
629	31.3085	29.9861
630	31.006	30.5341
631	31.0834	30.5696
632	30.6981	30.1362
633	31.0835	30.1654
634	30.9538	30.0235
635	30.4567	30.1273
636	30.5568	30.2225
637	30.5077	30.3166
638	30.9367	30.0772
639	30.5922	29.985
640	30.8796	30.0078
641	30.8816	30.0486
642	30.6878	30.0764
643	30.8487	30.1805
644	31.0407	30.496
645	30.925	30.3699
646	30.623	30.2429
647	31.0425	30.1365
648	30.5364	30.3336
649	30.7983	29.9551
650	30.675	30.2524
651	30.6157	30.4519
652	30.7816	29.8989
653	30.5666	30.056
654	30.594	30.0588
655	30.6459	30.1989
656	30.606	30.4097
657	30.6724	30.0942
658	31.0016	30.7184
659	31.2582	30.6564
660	31.1148	30.1919
661	30.8565	30.6057
662	30.8559	30.3001
663	30.77	30.6227
664	30.8701	30.3658
665	30.8448	30.6896
666	30.5448	30.3273
667	30.831	30.3417
668	31.1558	30.4817
669	30.8897	30.1855
670	30.3258	29.8109
671	30.3957	30.2783
672	30.2676	30.2803
673	30.3366	30.4325
674	30.3697	30.5668
675	30.9637	30.1775
676	30.5219	30.1772
677	30.3952	30.3846
678	30.5822	30.2599
679	30.4748	30.5713
680	29.8591	30.5183
681	29.779	30.2902
682	30.5852	30.2217
683	30.477	30.3063
684	30.7306	30.2246
685	30.5657	30.5163
686	30.7677	30.3889
687	30.5701	30.6933
688	30.3697	30.2041
689	30.4649	30.3062
690	30.3337	30.0444
691	30.5446	29.6926
692	30.5231	30.0076
693	30.4423	30.0771
694	30.7061	30.1385
695	30.6202	30.3493
696	30.6278	30.2145
697	30.688	30.1986
698	30.6361	30.2212
699	30.6496	30.197
700	30.3421	30.3591
701	30.5772	30.4167
702	30.4739	30.1064
703	29.779	30.0787
704	29.6763	30.162
705	30.2691	30.5233
706	30.324	30.3425
707	30.6325	30.4053
708	30.7727	30.3297
709	30.1734	30.535
710	29.6712	30.5013
711	30.2554	30.4097
712	30.6638	30.7899
713	30.7199	30.4534
714	30.6322	30.42
715	30.4887	30.6578
716	30.7936	30.4239
717	30.3201	30.8236
718	30.2989	30.7356
719	30.6797	30.7427
720	30.1426	30.3579
721	30.1415	30.2973
722	30.1649	30.4622
723	30.4724	30.7216
724	30.3383	30.6881
725	30.0261	30.8256
726	30.2131	30.2957
727	29.8595	30.4371
728	30.1117	30.2172
729	30.1892	30.1904
730	30.3942	30.7086
731	30.3965	30.574
732	29.9853	30.5685
733	30.2482	30.1283
734	30.4767	30.5771
735	30.1834	30.3751
736	30.297	30.8254
737	30.4859	30.2251
738	30.5644	30.6706
739	30.3347	30.5859
740	30.2541	30.6235
741	30.9123	30.5334
742	30.3479	30.5813
743	30.4191	30.5478
744	30.2768	30.5015
745	30.0205	30.3111
746	30.0421	30.5161
747	30.2231	30.0855
748	30.2528	30.4537
749	30.7674	30.0704
750	30.6197	30.6734
751	30.2754	30.7735
752	30.4949	30.79
753	30.5857	30.7423
754	30.343	30.2483
755	30.6895	30.3369
756	30.7215	30.6606
757	30.4479	30.8292
758	30.3382	30.0717
759	30.786	30.2596
760	30.9296	30.4846
761	30.2933	29.9105
762	30.8342	30.1131
763	30.6449	30.2883
764	30.5489	30.0676
765	30.2189	29.9803
766	30.5284	30.225
767	30.022	30.3211
768	30.5096	30.2504
769	30.4194	30.6034
770	30.4821	30.0591
771	30.3416	29.8575
772	30.1225	29.8013
773	30.524	30.3069
774	30.0058	30.0277
775	30.7019	30.2794
776	30.6209	30.4299
777	30.8345	30.2
778	30.8348	30.3331
779	30.532	30.3361
780	30.4634	29.9172
781	30.9113	29.8241
782	30.7862	30.2683
783	30.7632	30.439
784	30.869	30.053
785	30.0016	30.1089
786	30.1218	30.2775
787	30.4221	30.2631
788	30.3231	30.7362
789	30.5793	30.162
790	30.4806	30.6445
791	30.6736	30.6604
792	30.7086	30.6659
793	30.6665	30.6537
794	30.0913	30.6883
795	30.3858	30.5779
796	30.4748	30.3727
797	29.7569	30.362
798	30.3388	30.7031
799	30.1068	30.5128
800	30.4434	30.7724
