# Supplementary material for: Aromatic interactions with membrane modulate human BK channel activation
Source: eLife. 2020 Jun 29;9:e55571. doi: 10.7554/eLife.55571 (PMC7371421; doi:10.7554/eLife.55571)
Supplement: Figure 2—source data 2. [file elife-55571-fig2-data2.xlsx]

## Sheet: FIGURE 2
	section b	RMSF
	Resid	Metal-free	Metal-bound
	230	0.1048	0.092925
	231	0.10715	0.1346
	232	0.106225	0.102925
	233	0.09925	0.080825
	234	0.112575	0.1469
	235	0.1033	0.107025
	236	0.087575	0.07775
	237	0.108675	0.075025
	238	0.098725	0.1054
	239	0.118125	0.098875
	240	0.0765	0.0685
	241	0.097525	0.08805
	242	0.098975	0.108225
	243	0.090925	0.10425
	244	0.071375	0.071925
	245	0.0701	0.073525
	246	0.06795	0.07055
	247	0.077175	0.0815
	248	0.0721	0.071775
	249	0.066575	0.06985
	250	0.0665	0.0717
	251	0.064925	0.070225
	252	0.14075	0.1152
	253	0.09265	0.0959
	254	0.074525	0.081125
	255	0.090175	0.1021
	256	0.089925	0.082525
	257	0.0811	0.075875
	258	0.12435	0.102675
	259	0.093875	0.093425
	260	0.088225	0.08735
	261	0.1013	0.101225
	262	0.1143	0.120225
	263	0.168025	0.15315
	264	0.166575	0.210125
	265	0.16725	0.218875
	266	0.13275	0.258075
	267	0.193125	0.268225
	268	0.200925	0.312475
	269	0.215175	0.269075
	270	0.180875	0.2932
	271	0.1092	0.140225
	272	0.10505	0.12055
	273	0.0812	0.0794
	274	0.071175	0.08275
	275	0.08635	0.086325
	276	0.086175	0.08755
	277	0.0688	0.0688
	278	0.072625	0.0678
	279	0.07015	0.068925
	280	0.07175	0.0645
	281	0.083975	0.083075
	282	0.084725	0.07495
	283	0.064825	0.059075
	284	0.060325	0.0571
	285	0.113725	0.0865
	286	0.059375	0.05625
	287	0.060225	0.056725
	288	0.0632	0.06005
	289	0.060825	0.053075
	290	0.064325	0.057425
	291	0.072275	0.05995
	292	0.083375	0.06325
	293	0.100775	0.09865
	294	0.125425	0.082425
	295	0.0732	0.06595
	296	0.147275	0.1371
	297	0.072175	0.0704
	298	0.082275	0.0798
	299	0.095225	0.0977
	300	0.0629	0.063975
	301	0.07875	0.0739
	302	0.08935	0.08775
	303	0.1019	0.106525
	304	0.083325	0.091
	305	0.074575	0.0767
	306	0.1477	0.17795
	307	0.075625	0.084625
	308	0.079875	0.08645
	309	0.094275	0.115225
	310	0.0705	0.076325
	311	0.068775	0.07235
	312	0.0849	0.1157
	313	0.07225	0.080675
	314	0.119625	0.1084
	315	0.136025	0.09785
	316	0.078975	0.0869
	317	0.082125	0.093725
	318	0.13285	0.09115
	319	0.089875	0.0872
	320	0.086375	0.084875
	321	0.1171	0.1116
	322	0.095225	0.109175
	323	0.096975	0.10505
	324	0.142725	0.1393
	325	0.0989	0.111725
	326	0.109925	0.123
	327	0.09945	0.10715
	328	0.152975	0.1504
	329	0.133625	0.11355
	330	0.194925	0.2008
	331	0.17875	0.129125
	332	0.127225	0.11205
	333	0.119525	0.098425
	334	0.119225	0.097875
	335	0.128325	0.109125
	336	0.109675	0.094025
	337	0.146025	0.1216
	338	0.154725	0.13425
	339	0.175275	0.15545
	340	0.184225	0.1804
	341	0.16505	0.148125
	342	0.190225	0.116925
	343	0.170325	0.143025
	344	0.10815	0.090925
	345	0.1048	0.094225
	346	0.1027	0.08535
	347	0.097725	0.084475
	348	0.1082	0.096025
	349	0.1108	0.093075
	350	0.17205	0.161275
	351	0.139825	0.107425
	352	0.14175	0.1174
	353	0.121525	0.104225
	354	0.158525	0.1491
	355	0.12645	0.108325
	356	0.11085	0.090375
	357	0.113575	0.09955
	358	0.116	0.115025
	359	0.11885	0.0981
	360	0.107825	0.102525
	361	0.1485	0.16405
	362	0.11315	0.11155
	363	0.124	0.099225
	364	0.1198	0.11565
	365	0.135	0.12665
	366	0.23305	0.176475
	367	0.184825	0.11395
	368	0.151275	0.142475
	369	0.220525	0.183525
	370	0.225125	0.185825
	371	0.202425	0.148375
	372	0.18575	0.14485
	373	0.13085	0.1054
	374	0.121825	0.095725
	375	0.1088	0.09045
	376	0.1029	0.084575
	377	0.100225	0.082925
	378	0.104025	0.090975
	379	0.114925	0.09095
	380	0.17085	0.144075
	381	0.16945	0.1322
	382	0.15695	0.127425
	383	0.1273	0.099725
	384	0.1818	0.1429
	385	0.143175	0.09925
	386	0.16715	0.119475
	387	0.12125	0.092975
	388	0.126275	0.1091
	389	0.107325	0.087175
	390	0.12155	0.103575
	391	0.13135	0.10875
	392	0.1531	0.12195
	393	0.190625	0.149825
	394	0.12315	0.11385
	395	0.17165	0.13455
	396	0.1321	0.10885
	397	0.154325	0.148375
