# Supplementary material for: Aromatic interactions with membrane modulate human BK channel activation
Source: eLife. 2020 Jun 29;9:e55571. doi: 10.7554/eLife.55571 (PMC7371421; doi:10.7554/eLife.55571)
Supplement: Figure 3—source data 1. [file elife-55571-fig3-data1.xlsx]

## Sheet: FIGURE 3
			0C0M	SEM	0C0M	SEM
		WT	183.4	3.2	0.2	2.9
		K0	89.6	3.5	-66.7	4.8
		K1	165.2	5.6	-4.2	6.5
		K2	195.5	3.5	59	3.4
		K3	NC		NC
		K4	94.6	4.3	-50.4	3.8
		K5	NC		NC
		K6	NC		NC
		K7	48.7	4.7	-63.7	5.6
			K7	48.7	4.7	-63.7	5.6
			K4	94.6	4.3	-50.4	3.8	K0	89.6	3.5	-66.7	4.8
			K1	165.2	5.6	-4.2	6.5	K2	195.5	3.5	59	3.4
			WT	183.4	3.2	0.2	2.9
