# Supplementary material for: Aromatic interactions with membrane modulate human BK channel activation
Source: eLife. 2020 Jun 29;9:e55571. doi: 10.7554/eLife.55571 (PMC7371421; doi:10.7554/eLife.55571)
Supplement: Figure 5—source data 1. [file elife-55571-fig5-data1.xlsx]

## Sheet: FIGURE 5
	pi-cation	pi-cation (std)	hbond	hbond (std)	C-C contact	C-C contact (std)	SASA	SASA (std)
Metal-free WT	0.07659	0.0669	0	0	0	0	0.000123967	0.000118722
Metal-bound WT	0.07395	0.08208	0	0	0	0	0.000285349	0.00049424
--	--	--	--	--	--	--	--	--
Metal-free K0	0.20928	0.10683	1.53752	0.09437	0.026	0.04489	0.00897	0.01464
Metal-bound K0	0.23261	0.0809	1.74891	0.22156	0.58858	0.82829	0.29388	0.44029
--	--	--	--	--	--	--	--	--
Metal-free K2	0.17606	0.04273	1.73347	0.6831	0.50297	0.86281	0.22333	0.36833
Metal-bound K2	0.22547	0.07712	2.31638	0.69221	2.5033	2.95353	1.00274	0.91788
--	--	--	--	--	--	--	--	--
Metal-free K7	0.14722	0.13581	2.75332	0.2671	9.12906	0.75859	2.81978	0.167
Metal-bound K7	0.36256	0.06584	1.91895	0.49533	9.25395	2.15514	3.08556	0.89144
