# Supplementary material for: Aromatic interactions with membrane modulate human BK channel activation
Source: eLife. 2020 Jun 29;9:e55571. doi: 10.7554/eLife.55571 (PMC7371421; doi:10.7554/eLife.55571)
Supplement: Figure 6—source data 1. [file elife-55571-fig6-data1.xlsx]

## Sheet: FIGURE 6
WT 0C0M					Core-MT 0C0M				K0 0C0M				K0 on Core-MT 0C0M				K2 0C0M				K2 on Core-MT 0C0M				K7 0C0M				K7 on Core-MT 0C0M
	Voltage	Po	SEM		Voltage	Po	SEM		Voltage	Po	SEM		Voltage	Po	SEM		Voltage	Po	SEM		Voltage	Po	SEM		Voltage	Po	SEM		Voltage	Po	SEM
	-30	0.00501259	0.0025678		-30	-0.000460371	0.000456814		-150	0.00267666	0.000390522		-80	0.00171828	0		-30	0.00250144	0.0011915		-30	-0.00055422	0.000800747		-80	0.0192179	0.0152712		-30	0.00835887	0.00597102
	-20	0.0049744	0.00279		-20	-0.000939753	0.00034703		-140	0.01613	0.0122052		-70	0.00205031	0		-20	0.00368687	0.000364543		-20	0.000344316	0.000370738		-70	0.0085252	0.00319404		-20	0.0089016	0.00532329
	-10	0.00547451	0.00188349		-10	-0.000957222	0.000295682		-130	0.0423812	0.00422001		-60	0.00184766	0		-10	0.00388779	0.000443153		-10	0.000346112	0.000229334		-60	0.0217715	0.00697631		-10	0.0100807	0.00715973
	0	0.0128392	0.00506749		0	-0.000879351	0.0003836		-120	0.0042147	0.00122161		-50	0.00202253	0		0	0.00293056	0.000637951		0	0.000387126	0.000231961		-50	0.0232985	0.00837597		0	0.00873151	0.00517179
	10	-0.00110297	0.00869908		10	-0.000420438	0.000491088		-110	0.0194449	0.00528455		-40	0.00237641	0		10	0.00385993	0.000921329		10	0.000248156	0.000312417		-40	0.03086	0.00695258		10	0.00925109	0.0052309
	20	0.0102418	0.00296848		20	-0.000533962	0.00041105		-100	0.0280776	0.00584763		-30	0.00561892	0.00219143		20	0.00405278	0.000904369		20	0.00037169	0.000296275		-30	0.0292171	0.00923994		20	0.00891838	0.00544986
	30	0.00540972	0.00216482		30	-0.000353276	0.000486971		-90	0.0384497	0.0109228		-20	0.00583356	0.00215009		30	0.00409574	0.000756826		30	0.000144181	0.000286329		-20	0.0645508	0.0173703		30	0.0105628	0.00597135
	40	0.00541399	0.00210193		40	-0.000619761	0.000357304		-80	0.0100134	0.00804104		-10	0.00573974	0.0021058		40	0.00548602	0.0012426		40	0.000205135	0.000172061		-10	0.0637184	0.0160526		40	0.00987445	0.00627651
	50	0.00540083	0.00173578		50	-0.000410042	0.000370588		-70	0.0270014	0.0047255		0	0.00578395	0.00220318		50	0.00473409	0.000949409		50	0.00023989	0.000345823		0	0.133337	0.0195115		50	0.0133103	0.00806861
	60	0.00578739	0.00181785		60	-1.6451e-05	0.000557528		-60	0.0496625	0.00972466		10	0.000197014	0.00149168		60	0.00604119	0.00115052		60	0.000329619	0.00029226		10	0.179449	0.0198366		60	0.0129978	0.00843888
	70	0.00484622	0.00260384		70	-0.0016769	0.00192885		-50	0.0464148	0.00814924		20	0.00573661	0.00226844		70	0.00610622	0.00156015		70	0.000152911	0.000417774		20	0.265535	0.0372217		70	0.0219428	0.00982727
	80	0.00599685	0.00178965		80	0.00218221	0.00105091		-40	0.0536791	0.00660518		30	0.00556801	0.00215855		80	0.00630999	0.00141743		80	0.000242246	0.000297573		30	0.334345	0.0407273		80	0.0288702	0.0179971
	90	0.00589704	0.00262635		90	0.00301616	0.00161914		-30	0.0546096	0.0111851		40	0.00560759	0.00209947		90	0.0131583	0.00242685		90	0.000291421	0.000301087		40	0.388883	0.0354243		90	0.0496004	0.0234791
	100	0.0148383	0.00669018		100	0.00694058	0.00231485		-20	0.117199	0.0214717		50	0.00654383	0.0017455		100	0.0259519	0.00414412		100	0.000480074	0.000320087		50	0.499352	0.0590159		100	0.0743035	0.0376212
	110	0.0229699	0.0108381		110	0.00706432	0.00298295		-10	0.126893	0.0285362		60	0.00652555	0.00209127		110	0.039699	0.00469641		110	0.000854946	0.000442103		60	0.641228	0.0423244		110	0.10601	0.0449325
	120	0.070321	0.0164767		120	0.0142611	0.00489994		0	0.181116	0.029829		70	0.00683463	0.00206964		120	0.0535979	0.00310534		120	0.00111862	0.000417845		70	0.693099	0.0449705		120	0.165639	0.0690004
	130	0.103922	0.0407675		130	0.0200221	0.00564382		10	0.194708	0.0315447		80	0.0101988	0.00298971		130	0.0912815	0.00625933		130	0.00104291	0.000511683		80	0.777925	0.0368271		130	0.225541	0.0841914
	140	0.169299	0.0219132		140	0.0226854	0.0101642		20	0.25195	0.0379876		90	0.0201638	0.00456127		140	0.110886	0.0114955		140	0.00213511	0.000888172		90	0.79384	0.0358637		140	0.293317	0.0938313
	150	0.277617	0.00512709		150	0.0352053	0.00988821		30	0.313475	0.0496547		100	0.0199214	0.00358398		150	0.182615	0.011993		150	0.00410427	0.000928882		100	0.890977	0.0283295		150	0.357019	0.0958406
	160	0.332323	0.024441		160	0.0427763	0.0177737		40	0.36911	0.0493896		110	0.0356673	0.00423165		160	0.228322	0.0180207		160	0.00977362	0.00257444		110	0.906105	0.0266102		160	0.444217	0.100868
	170	0.409346	0.0271908		170	0.0613811	0.0202417		50	0.439564	0.0577079		120	0.0559743	0.00773749		170	0.308639	0.0207024		170	0.0249037	0.00523213		120	0.956713	0.0233715		170	0.523241	0.117992
	180	0.508631	0.0305921		180	0.0926775	0.0273235		60	0.484187	0.0525553		130	0.0886251	0.00435407		180	0.372389	0.0185791		180	0.0284201	0.00389893		130	0.954718	0.0302603		180	0.591394	0.115476
	190	0.581688	0.0227255		190	0.127273	0.0350074		70	0.531743	0.0519884		140	0.128948	0.00988514		190	0.441823	0.0152788		190	0.0409632	0.00563452		140	0.998311	0.017818		190	0.670235	0.0935598
	200	0.693256	0.0407279		200	0.171596	0.0384685		80	0.603167	0.0523979		150	0.189643	0.0102924		200	0.557534	0.0170368		200	0.0601419	0.00607569		150	0.9891	0.0199218		200	0.745354	0.0828505
	210	0.776596	0.0367834		210	0.221804	0.0474195		90	0.636476	0.04786		160	0.247146	0.0181832		210	0.618235	0.0196197		210	0.0944219	0.010606		160	0.989686	0.00576213		210	0.806025	0.065775
	220	0.846555	0.0282625		220	0.291012	0.0527084		100	0.718329	0.0516001		170	0.321865	0.0164302		220	0.729383	0.018363		220	0.134698	0.0129636		170	0.966487	0.0197922		220	0.874542	0.0696073
	230	0.869049	0.0045783		230	0.387075	0.058327		110	0.736872	0.0441021		180	0.38829	0.015409		230	0.744254	0.037726		230	0.213251	0.0191276		180	1.00042	0.0264484		230	0.912811	0.054826
	240	0.939929	0.017003		240	0.484025	0.049075		120	0.786315	0.037837		190	0.489122	0.0202763		240	0.857975	0.0246856		240	0.292982	0.023726		190	1.00316	0.0130014		240	0.915493	0.0214405
	250	0.921223	0.0617429		250	0.613876	0.0437018		130	0.802016	0.0322585		200	0.537554	0.0178973		250	0.89347	0.0110631		250	0.399142	0.0336208		200	0.953826	0.0177804		250	0.957526	0.0243792
									140	0.847979	0.0310996		210	0.628061	0.0138075						260	0.447124	0.017232
									150	0.907618	0.031372		220	0.714801	0.0131463						270	0.560185	0.0213928
									160	0.91411	0.0208398		230	0.78745	0.0151929
									170	0.937962	0.0202191		240	0.853892	0.0188761
									180	0.980022	0.0152572		250	0.890769	0.0179916
									190	0.995822	0.0221318		260	0.881849	0.0014371
									200	0.976631	0.00823738		270	0.946628	0.0077836
