# Supplementary material for: Aromatic interactions with membrane modulate human BK channel activation
Source: eLife. 2020 Jun 29;9:e55571. doi: 10.7554/eLife.55571 (PMC7371421; doi:10.7554/eLife.55571)
Supplement: Figure 6—source data 2. [file elife-55571-fig6-data2.xlsx]

## Sheet: FIGURE 6
	K0 0C0M QV				WT 0C0M QV				K0 on Core-MT QV 0C0M						Core-MT QV 0C0M
	Voltage	Qon	SEM		Voltage	Qon	SEM		-80	-0.0444135	0.0450133				-80	0.0158326	0.00172169
	-80	-0.0136958	0.0291312		-80	-0.00425628	0.0190867		-70	0.00188253	0.0615718				-70	0.0170155	0.00185133
	-70	0.010967	0.0134224		-70	0.0124967	0.0142852		-60	0.0026	0.0176556				-60	0.0278801	0.00732483
	-60	0.00683004	0.013338		-60	0.0453632	0.0249626		-50	-3.59118e-06	0.0308962				-50	0.0234502	0.00187079
	-50	-0.0167339	0.0201006		-50	0.0120987	0.00653574		-40	0.00992685	0.0273244				-40	0.0310608	0.00177822
	-40	0.0212007	0.00749542		-40	0.0130085	0.0166134		-30	0.0190064	0.0231417				-30	0.0340886	0.00120941
	-30	0.0167824	0.0253626		-30	0.0206558	0.00375889		-20	-0.017946	0.0175602				-20	0.0428896	0.00347224
	-20	0.052095	0.0364707		-20	0.0456337	0.0159344		-10	0.0531821	0.0260681				-10	0.0504356	0.00424124
	-10	0.030423	0.00362733		-10	0.0252192	0.00811393		0	0.0578005	0.0120688				0	0.0599701	0.00497888
	0	0.0337655	0.0347613		0	0.0278875	0.00983838		10	0.0364577	0.0253183				10	0.0737541	0.00558704
	10	0.0854734	0.00457904		10	0.0389367	0.0124281		20	0.0306188	0.00801558				20	0.089112	0.00663002
	20	0.00790725	0.0199092		20	0.0546313	0.0131624		30	-0.000825204	0.0368905				30	0.10935	0.00886677
	30	0.0636427	0.0313905		30	0.0666519	0.0120041		40	0.0504961	0.0203224				40	0.12566	0.0095491
	40	0.054461	0.0246447		40	0.0794	0.0141976		50	0.101288	0.0144245				50	0.152262	0.0125471
	50	0.1328	0.0179493		50	0.10062	0.0119517		60	0.121195	0.00683301				60	0.182631	0.0154234
	60	0.0951309	0.0554959		60	0.156903	0.0272642		70	0.128199	0.0120568				70	0.209811	0.0166652
	70	0.14607	0.0307671		70	0.157209	0.0184767		80	0.205512	0.029094				80	0.245188	0.0196324
	80	0.155963	0.05618		80	0.15153	0.0124021		90	0.209078	0.0294493				90	0.286354	0.0204244
	90	0.219562	0.0217835		90	0.206082	0.0161019		100	0.242604	0.0431033				100	0.324946	0.022105
	100	0.257632	0.00454708		100	0.239749	0.0137699		110	0.263641	0.0185504				110	0.365551	0.0254348
	110	0.245316	0.0598039		110	0.281824	0.0107751		120	0.324985	0.037183				120	0.41335	0.0248703
	120	0.301126	0.051607		120	0.274451	0.0138625		130	0.341266	0.0444558				130	0.462852	0.026549
	130	0.35	0.0184229		130	0.353896	0.00963559		140	0.449317	0.0506069				140	0.507923	0.0264129
	140	0.420355	0.0307671		140	0.391253	0.0143199		150	0.450486	0.0760663				150	0.554536	0.0265318
	150	0.47265	0.008987		150	0.460968	0.0219774		160	0.493445	0.0400265				160	0.602495	0.0267627
	160	0.490644	0.042213		160	0.520491	0.0324041		170	0.536713	0.046088				170	0.649098	0.0252573
	170	0.516282	0.00992926		170	0.56502	0.0196921		180	0.603492	0.0572276				180	0.691658	0.0245215
	180	0.569018	0.0728467		180	0.604546	0.024197		190	0.649412	0.0700998				190	0.73164	0.0229699
	190	0.606516	0.0383092		190	0.667668	0.0382696		200	0.634982	0.038813				200	0.768659	0.0201355
	200	0.727008	0.0558113		200	0.692723	0.0230918		210	0.706346	0.0664319				210	0.801024	0.0187269
	210	0.820008	0.0152234		210	0.738557	0.0289429		220	0.683171	0.0491314				220	0.841476	0.0266928
	220	0.728004	0.0435238		220	0.739282	0.0232494		230	0.764875	0.0722139				230	0.856272	0.0170697
	230	0.789275	0.0218022		230	0.810382	0.0302207		240	0.79282	0.0698656				240	0.878917	0.0144856
	240	0.831368	0.00113453		240	0.818007	0.0371607		250	0.822269	0.0659231				250	0.901453	0.012188
	250	0.875059	0.0519215		250	0.85387	0.0283243		260	0.890648	0.0631773				260	0.926954	0.0114965
	260	0.813898	0.0528032		260	0.916192	0.0453514		270	0.847967	0.0552413				270	0.942895	0.00906817
	270	0.87	0.025654		270	0.895412	0.017828		280	0.909933	0.0460373				280	0.947992	0.00716709
	280	0.908177	0.0439645		280	0.944544	0.0190127		290	0.93769	0.040241				290	0.951536	0.00347923
	290	0.914748	0.0566098		290	0.89586	0.00195923		300	0.98	0.0796905				300	0.953253	0.00904701
	300	0.9403	0.03267		300	0.908726	0.0116729
