# Supplementary material for: Aromatic interactions with membrane modulate human BK channel activation
Source: eLife. 2020 Jun 29;9:e55571. doi: 10.7554/eLife.55571 (PMC7371421; doi:10.7554/eLife.55571)
Supplement: Figure 7—source data 1. [file elife-55571-fig7-data1.xlsx]

## Sheet: FIGURE 7
	IIELIGNRGGKGSKYSRAVSKG Y330G on K0 0C0M
		Voltage	Po	SEM
		-30	0.00787395	0.00215353
		-20	0.00764246	0.00224223
		-10	0.00715315	0.00215605
		0	0.00736197	0.00219752
		10	0.00759132	0.00223383
		20	0.00788563	0.00239454
		30	0.00790348	0.00214424
		40	0.00788627	0.00238023
		50	0.0119995	0.00406177
		60	0.0170064	0.0057304
		70	0.0212402	0.0045736
		80	0.0294049	0.00671293
		90	0.0492087	0.00882409
		100	0.0733611	0.0100523
		110	0.105805	0.0150343
		120	0.14865	0.0152479
		130	0.207727	0.0238167
		140	0.274688	0.0245478
		150	0.358791	0.0260243
		160	0.433767	0.023761
		170	0.514965	0.0234176
		180	0.568664	0.0230347
		190	0.654807	0.0244977
		200	0.731667	0.0217348
		210	0.781488	0.0238523
		220	0.859954	0.019822
		230	0.902743	0.0147106
		240	0.927967	0.0200774
		250	0.950625	0.0088164
