# Supplementary material for: Aromatic interactions with membrane modulate human BK channel activation
Source: eLife. 2020 Jun 29;9:e55571. doi: 10.7554/eLife.55571 (PMC7371421; doi:10.7554/eLife.55571)
Supplement: Figure 8—source data 1. [file elife-55571-fig8-data1.xlsx]

## Sheet: FIGURE 8
L0	V1/2		D	V1/2		L0	V1/2		D	V1/2
0C0M	0C0M		0C0M	0C0M		100C0M	100C0M		100C0M	100C0M
1.29917	-100		19241.7	-100		7.5361e-05	-100		456.765	-100
1.29699	-99.9		19193.9	-99.9		7.50829e-05	-99.9		455.625	-99.9
1.29482	-99.8		19146.3	-99.8		7.48054e-05	-99.8		454.487	-99.8
1.29264	-99.7		19098.7	-99.7		7.45287e-05	-99.7		453.352	-99.7
1.29047	-99.6		19051.3	-99.6		7.42526e-05	-99.6		452.22	-99.6
1.2883	-99.5		19004	-99.5		7.39772e-05	-99.5		451.09	-99.5
1.28613	-99.4		18956.8	-99.4		7.37025e-05	-99.4		449.964	-99.4
1.28396	-99.3		18909.7	-99.3		7.34284e-05	-99.3		448.84	-99.3
1.28179	-99.2		18862.7	-99.2		7.31551e-05	-99.2		447.719	-99.2
1.27963	-99.1		18815.8	-99.1		7.28824e-05	-99.1		446.601	-99.1
1.27746	-99		18769.1	-99		7.26104e-05	-99		445.486	-99
1.2753	-98.9		18722.5	-98.9		7.23391e-05	-98.9		444.374	-98.9
1.27313	-98.8		18676	-98.8		7.20685e-05	-98.8		443.264	-98.8
1.27097	-98.7		18629.6	-98.7		7.17986e-05	-98.7		442.158	-98.7
1.26881	-98.6		18583.3	-98.6		7.15293e-05	-98.6		441.054	-98.6
1.26665	-98.5		18537.2	-98.5		7.12608e-05	-98.5		439.952	-98.5
1.26449	-98.4		18491.1	-98.4		7.09929e-05	-98.4		438.854	-98.4
1.26233	-98.3		18445.2	-98.3		7.07257e-05	-98.3		437.758	-98.3
1.26017	-98.2		18399.4	-98.2		7.04592e-05	-98.2		436.665	-98.2
1.25802	-98.1		18353.7	-98.1		7.01933e-05	-98.1		435.575	-98.1
1.25586	-98		18308.1	-98		6.99282e-05	-98		434.488	-98
1.25371	-97.9		18262.7	-97.9		6.96637e-05	-97.9		433.403	-97.9
1.25155	-97.8		18217.3	-97.8		6.93999e-05	-97.8		432.321	-97.8
1.2494	-97.7		18172.1	-97.7		6.91368e-05	-97.7		431.242	-97.7
1.24725	-97.6		18126.9	-97.6		6.88743e-05	-97.6		430.166	-97.6
1.2451	-97.5		18081.9	-97.5		6.86126e-05	-97.5		429.092	-97.5
1.24295	-97.4		18037	-97.4		6.83515e-05	-97.4		428.021	-97.4
1.24081	-97.3		17992.2	-97.3		6.80911e-05	-97.3		426.952	-97.3
1.23866	-97.2		17947.5	-97.2		6.78313e-05	-97.2		425.887	-97.2
1.23652	-97.1		17902.9	-97.1		6.75723e-05	-97.1		424.824	-97.1
1.23437	-97		17858.5	-97		6.73139e-05	-97		423.763	-97
1.23223	-96.9		17814.1	-96.9		6.70562e-05	-96.9		422.706	-96.9
1.23009	-96.8		17769.9	-96.8		6.67992e-05	-96.8		421.651	-96.8
1.22795	-96.7		17725.8	-96.7		6.65428e-05	-96.7		420.598	-96.7
1.22581	-96.6		17681.7	-96.6		6.62872e-05	-96.6		419.549	-96.6
1.22367	-96.5		17637.8	-96.5		6.60322e-05	-96.5		418.502	-96.5
1.22153	-96.4		17594	-96.4		6.57779e-05	-96.4		417.457	-96.4
1.2194	-96.3		17550.3	-96.3		6.55242e-05	-96.3		416.416	-96.3
1.21726	-96.2		17506.8	-96.2		6.52712e-05	-96.2		415.376	-96.2
1.21513	-96.1		17463.3	-96.1		6.50189e-05	-96.1		414.34	-96.1
1.213	-96		17419.9	-96		6.47673e-05	-96		413.306	-96
1.21086	-95.9		17376.7	-95.9		6.45163e-05	-95.9		412.275	-95.9
1.20873	-95.8		17333.5	-95.8		6.42661e-05	-95.8		411.246	-95.8
1.20661	-95.7		17290.5	-95.7		6.40164e-05	-95.7		410.22	-95.7
1.20448	-95.6		17247.5	-95.6		6.37675e-05	-95.6		409.196	-95.6
1.20235	-95.5		17204.7	-95.5		6.35192e-05	-95.5		408.175	-95.5
1.20022	-95.4		17162	-95.4		6.32716e-05	-95.4		407.157	-95.4
1.1981	-95.3		17119.3	-95.3		6.30247e-05	-95.3		406.141	-95.3
1.19598	-95.2		17076.8	-95.2		6.27784e-05	-95.2		405.128	-95.2
1.19385	-95.1		17034.4	-95.1		6.25328e-05	-95.1		404.117	-95.1
1.19173	-95		16992.1	-95		6.22879e-05	-95		403.109	-95
1.18961	-94.9		16949.9	-94.9		6.20436e-05	-94.9		402.103	-94.9
1.1875	-94.8		16907.8	-94.8		6.18e-05	-94.8		401.1	-94.8
1.18538	-94.7		16865.9	-94.7		6.15571e-05	-94.7		400.1	-94.7
1.18326	-94.6		16824	-94.6		6.13149e-05	-94.6		399.102	-94.6
1.18115	-94.5		16782.2	-94.5		6.10733e-05	-94.5		398.106	-94.5
1.17903	-94.4		16740.5	-94.4		6.08323e-05	-94.4		397.113	-94.4
1.17692	-94.3		16699	-94.3		6.05921e-05	-94.3		396.123	-94.3
1.17481	-94.2		16657.5	-94.2		6.03525e-05	-94.2		395.135	-94.2
1.1727	-94.1		16616.1	-94.1		6.01135e-05	-94.1		394.149	-94.1
1.17059	-94		16574.9	-94		5.98753e-05	-94		393.166	-94
1.16848	-93.9		16533.7	-93.9		5.96377e-05	-93.9		392.185	-93.9
1.16637	-93.8		16492.7	-93.8		5.94007e-05	-93.8		391.207	-93.8
1.16427	-93.7		16451.7	-93.7		5.91644e-05	-93.7		390.232	-93.7
1.16216	-93.6		16410.9	-93.6		5.89288e-05	-93.6		389.258	-93.6
1.16006	-93.5		16370.1	-93.5		5.86938e-05	-93.5		388.288	-93.5
1.15796	-93.4		16329.5	-93.4		5.84595e-05	-93.4		387.319	-93.4
1.15586	-93.3		16288.9	-93.3		5.82259e-05	-93.3		386.354	-93.3
1.15376	-93.2		16248.5	-93.2		5.79929e-05	-93.2		385.39	-93.2
1.15166	-93.1		16208.1	-93.1		5.77605e-05	-93.1		384.429	-93.1
1.14956	-93		16167.9	-93		5.75289e-05	-93		383.471	-93
1.14747	-92.9		16127.8	-92.9		5.72978e-05	-92.9		382.514	-92.9
1.14537	-92.8		16087.7	-92.8		5.70675e-05	-92.8		381.561	-92.8
1.14328	-92.7		16047.8	-92.7		5.68378e-05	-92.7		380.609	-92.7
1.14119	-92.6		16007.9	-92.6		5.66087e-05	-92.6		379.66	-92.6
1.1391	-92.5		15968.2	-92.5		5.63803e-05	-92.5		378.714	-92.5
1.13701	-92.4		15928.5	-92.4		5.61526e-05	-92.4		377.77	-92.4
1.13492	-92.3		15889	-92.3		5.59255e-05	-92.3		376.828	-92.3
1.13283	-92.2		15849.5	-92.2		5.56991e-05	-92.2		375.888	-92.2
1.13075	-92.1		15810.2	-92.1		5.54733e-05	-92.1		374.951	-92.1
1.12866	-92		15770.9	-92		5.52481e-05	-92		374.017	-92
1.12658	-91.9		15731.8	-91.9		5.50237e-05	-91.9		373.084	-91.9
1.1245	-91.8		15692.7	-91.8		5.47998e-05	-91.8		372.154	-91.8
1.12242	-91.7		15653.8	-91.7		5.45766e-05	-91.7		371.227	-91.7
1.12034	-91.6		15614.9	-91.6		5.43541e-05	-91.6		370.301	-91.6
1.11826	-91.5		15576.1	-91.5		5.41322e-05	-91.5		369.378	-91.5
1.11618	-91.4		15537.5	-91.4		5.3911e-05	-91.4		368.458	-91.4
1.11411	-91.3		15498.9	-91.3		5.36904e-05	-91.3		367.539	-91.3
1.11203	-91.2		15460.4	-91.2		5.34704e-05	-91.2		366.623	-91.2
1.10996	-91.1		15422	-91.1		5.32511e-05	-91.1		365.71	-91.1
1.10789	-91		15383.7	-91		5.30325e-05	-91		364.798	-91
1.10582	-90.9		15345.6	-90.9		5.28145e-05	-90.9		363.889	-90.9
1.10375	-90.8		15307.5	-90.8		5.25971e-05	-90.8		362.982	-90.8
1.10168	-90.7		15269.5	-90.7		5.23804e-05	-90.7		362.078	-90.7
1.09961	-90.6		15231.5	-90.6		5.21643e-05	-90.6		361.175	-90.6
1.09755	-90.5		15193.7	-90.5		5.19489e-05	-90.5		360.275	-90.5
1.09548	-90.4		15156	-90.4		5.17341e-05	-90.4		359.378	-90.4
1.09342	-90.3		15118.4	-90.3		5.15199e-05	-90.3		358.482	-90.3
1.09136	-90.2		15080.9	-90.2		5.13064e-05	-90.2		357.589	-90.2
1.0893	-90.1		15043.4	-90.1		5.10935e-05	-90.1		356.698	-90.1
1.08724	-90		15006.1	-90		5.08813e-05	-90		355.809	-90
1.08518	-89.9		14968.8	-89.9		5.06697e-05	-89.9		354.923	-89.9
1.08312	-89.8		14931.7	-89.8		5.04587e-05	-89.8		354.039	-89.8
1.08107	-89.7		14894.6	-89.7		5.02483e-05	-89.7		353.157	-89.7
1.07902	-89.6		14857.6	-89.6		5.00386e-05	-89.6		352.277	-89.6
1.07696	-89.5		14820.7	-89.5		4.98296e-05	-89.5		351.399	-89.5
1.07491	-89.4		14784	-89.4		4.96212e-05	-89.4		350.524	-89.4
1.07286	-89.3		14747.3	-89.3		4.94134e-05	-89.3		349.651	-89.3
1.07081	-89.2		14710.7	-89.2		4.92062e-05	-89.2		348.78	-89.2
1.06877	-89.1		14674.1	-89.1		4.89997e-05	-89.1		347.911	-89.1
1.06672	-89		14637.7	-89		4.87937e-05	-89		347.044	-89
1.06468	-88.9		14601.4	-88.9		4.85885e-05	-88.9		346.18	-88.9
1.06263	-88.8		14565.1	-88.8		4.83838e-05	-88.8		345.318	-88.8
1.06059	-88.7		14529	-88.7		4.81798e-05	-88.7		344.458	-88.7
1.05855	-88.6		14492.9	-88.6		4.79764e-05	-88.6		343.6	-88.6
1.05651	-88.5		14456.9	-88.5		4.77737e-05	-88.5		342.744	-88.5
1.05448	-88.4		14421.1	-88.4		4.75715e-05	-88.4		341.89	-88.4
1.05244	-88.3		14385.3	-88.3		4.737e-05	-88.3		341.039	-88.3
1.0504	-88.2		14349.6	-88.2		4.71691e-05	-88.2		340.19	-88.2
1.04837	-88.1		14313.9	-88.1		4.69689e-05	-88.1		339.343	-88.1
1.04634	-88		14278.4	-88		4.67692e-05	-88		338.498	-88
1.04431	-87.9		14243	-87.9		4.65702e-05	-87.9		337.655	-87.9
1.04228	-87.8		14207.6	-87.8		4.63718e-05	-87.8		336.814	-87.8
1.04025	-87.7		14172.4	-87.7		4.6174e-05	-87.7		335.975	-87.7
1.03822	-87.6		14137.2	-87.6		4.59769e-05	-87.6		335.139	-87.6
1.0362	-87.5		14102.1	-87.5		4.57803e-05	-87.5		334.304	-87.5
1.03418	-87.4		14067.1	-87.4		4.55844e-05	-87.4		333.472	-87.4
1.03215	-87.3		14032.2	-87.3		4.53891e-05	-87.3		332.642	-87.3
1.03013	-87.2		13997.4	-87.2		4.51944e-05	-87.2		331.814	-87.2
1.02811	-87.1		13962.6	-87.1		4.50003e-05	-87.1		330.988	-87.1
1.02609	-87		13928	-87		4.48069e-05	-87		330.164	-87
1.02408	-86.9		13893.4	-86.9		4.4614e-05	-86.9		329.342	-86.9
1.02206	-86.8		13858.9	-86.8		4.44218e-05	-86.8		328.522	-86.8
1.02005	-86.7		13824.5	-86.7		4.42302e-05	-86.7		327.704	-86.7
1.01803	-86.6		13790.2	-86.6		4.40392e-05	-86.6		326.888	-86.6
1.01602	-86.5		13756	-86.5		4.38488e-05	-86.5		326.075	-86.5
1.01401	-86.4		13721.8	-86.4		4.3659e-05	-86.4		325.263	-86.4
1.01201	-86.3		13687.8	-86.3		4.34698e-05	-86.3		324.454	-86.3
1.01	-86.2		13653.8	-86.2		4.32813e-05	-86.2		323.646	-86.2
1.00799	-86.1		13619.9	-86.1		4.30933e-05	-86.1		322.841	-86.1
1.00599	-86		13586.1	-86		4.29059e-05	-86		322.037	-86
1.00399	-85.9		13552.4	-85.9		4.27192e-05	-85.9		321.236	-85.9
1.00198	-85.8		13518.8	-85.8		4.2533e-05	-85.8		320.437	-85.8
0.999985	-85.7		13485.2	-85.7		4.23475e-05	-85.7		319.639	-85.7
0.997987	-85.6		13451.8	-85.6		4.21626e-05	-85.6		318.844	-85.6
0.99599	-85.5		13418.4	-85.5		4.19782e-05	-85.5		318.05	-85.5
0.993994	-85.4		13385.1	-85.4		4.17945e-05	-85.4		317.259	-85.4
0.992	-85.3		13351.9	-85.3		4.16113e-05	-85.3		316.47	-85.3
0.990008	-85.2		13318.7	-85.2		4.14288e-05	-85.2		315.682	-85.2
0.988017	-85.1		13285.7	-85.1		4.12469e-05	-85.1		314.897	-85.1
0.986027	-85		13252.7	-85		4.10655e-05	-85		314.113	-85
0.984039	-84.9		13219.8	-84.9		4.08848e-05	-84.9		313.332	-84.9
0.982052	-84.8		13187	-84.8		4.07046e-05	-84.8		312.552	-84.8
0.980067	-84.7		13154.3	-84.7		4.05251e-05	-84.7		311.775	-84.7
0.978083	-84.6		13121.7	-84.6		4.03461e-05	-84.6		310.999	-84.6
0.976101	-84.5		13089.1	-84.5		4.01677e-05	-84.5		310.226	-84.5
0.97412	-84.4		13056.6	-84.4		3.999e-05	-84.4		309.454	-84.4
0.972141	-84.3		13024.2	-84.3		3.98128e-05	-84.3		308.684	-84.3
0.970163	-84.2		12991.9	-84.2		3.96362e-05	-84.2		307.917	-84.2
0.968187	-84.1		12959.7	-84.1		3.94602e-05	-84.1		307.151	-84.1
0.966212	-84		12927.5	-84		3.92847e-05	-84		306.387	-84
0.964239	-83.9		12895.4	-83.9		3.91099e-05	-83.9		305.625	-83.9
0.962267	-83.8		12863.4	-83.8		3.89357e-05	-83.8		304.865	-83.8
0.960297	-83.7		12831.5	-83.7		3.8762e-05	-83.7		304.107	-83.7
0.958328	-83.6		12799.7	-83.6		3.85889e-05	-83.6		303.35	-83.6
0.956361	-83.5		12767.9	-83.5		3.84164e-05	-83.5		302.596	-83.5
0.954395	-83.4		12736.2	-83.4		3.82445e-05	-83.4		301.844	-83.4
0.952431	-83.3		12704.6	-83.3		3.80732e-05	-83.3		301.093	-83.3
0.950468	-83.2		12673.1	-83.2		3.79024e-05	-83.2		300.344	-83.2
0.948507	-83.1		12641.7	-83.1		3.77323e-05	-83.1		299.598	-83.1
0.946547	-83		12610.3	-83		3.75627e-05	-83		298.853	-83
0.944589	-82.9		12579	-82.9		3.73937e-05	-82.9		298.11	-82.9
0.942632	-82.8		12547.8	-82.8		3.72252e-05	-82.8		297.369	-82.8
0.940677	-82.7		12516.7	-82.7		3.70574e-05	-82.7		296.629	-82.7
0.938724	-82.6		12485.6	-82.6		3.68901e-05	-82.6		295.892	-82.6
0.936772	-82.5		12454.6	-82.5		3.67233e-05	-82.5		295.156	-82.5
0.934821	-82.4		12423.7	-82.4		3.65572e-05	-82.4		294.423	-82.4
0.932872	-82.3		12392.9	-82.3		3.63916e-05	-82.3		293.691	-82.3
0.930925	-82.2		12362.2	-82.2		3.62266e-05	-82.2		292.961	-82.2
0.928979	-82.1		12331.5	-82.1		3.60622e-05	-82.1		292.233	-82.1
0.927035	-82		12300.9	-82		3.58983e-05	-82		291.506	-82
0.925092	-81.9		12270.4	-81.9		3.5735e-05	-81.9		290.782	-81.9
0.923151	-81.8		12239.9	-81.8		3.55723e-05	-81.8		290.059	-81.8
0.921212	-81.7		12209.6	-81.7		3.54102e-05	-81.7		289.338	-81.7
0.919274	-81.6		12179.3	-81.6		3.52486e-05	-81.6		288.619	-81.6
0.917337	-81.5		12149.1	-81.5		3.50875e-05	-81.5		287.902	-81.5
0.915403	-81.4		12118.9	-81.4		3.49271e-05	-81.4		287.186	-81.4
0.913469	-81.3		12088.9	-81.3		3.47671e-05	-81.3		286.473	-81.3
0.911538	-81.2		12058.9	-81.2		3.46078e-05	-81.2		285.761	-81.2
0.909608	-81.1		12029	-81.1		3.4449e-05	-81.1		285.051	-81.1
0.907679	-81		11999.1	-81		3.42908e-05	-81		284.343	-81
0.905753	-80.9		11969.3	-80.9		3.41331e-05	-80.9		283.636	-80.9
0.903827	-80.8		11939.6	-80.8		3.3976e-05	-80.8		282.932	-80.8
0.901904	-80.7		11910	-80.7		3.38194e-05	-80.7		282.229	-80.7
0.899982	-80.6		11880.5	-80.6		3.36634e-05	-80.6		281.528	-80.6
0.898061	-80.5		11851	-80.5		3.3508e-05	-80.5		280.828	-80.5
0.896142	-80.4		11821.6	-80.4		3.33531e-05	-80.4		280.131	-80.4
0.894225	-80.3		11792.3	-80.3		3.31987e-05	-80.3		279.435	-80.3
0.89231	-80.2		11763	-80.2		3.30449e-05	-80.2		278.741	-80.2
0.890396	-80.1		11733.9	-80.1		3.28917e-05	-80.1		278.048	-80.1
0.888483	-80		11704.8	-80		3.2739e-05	-80		277.358	-80
0.886573	-79.9		11675.7	-79.9		3.25868e-05	-79.9		276.669	-79.9
0.884663	-79.8		11646.8	-79.8		3.24352e-05	-79.8		275.982	-79.8
0.882756	-79.7		11617.9	-79.7		3.22841e-05	-79.7		275.296	-79.7
0.88085	-79.6		11589	-79.6		3.21336e-05	-79.6		274.613	-79.6
0.878946	-79.5		11560.3	-79.5		3.19836e-05	-79.5		273.931	-79.5
0.877044	-79.4		11531.6	-79.4		3.18342e-05	-79.4		273.25	-79.4
0.875143	-79.3		11503	-79.3		3.16853e-05	-79.3		272.572	-79.3
0.873243	-79.2		11474.5	-79.2		3.15369e-05	-79.2		271.895	-79.2
0.871346	-79.1		11446	-79.1		3.13891e-05	-79.1		271.22	-79.1
0.86945	-79		11417.6	-79		3.12418e-05	-79		270.547	-79
0.867556	-78.9		11389.3	-78.9		3.10951e-05	-78.9		269.875	-78.9
0.865663	-78.8		11361.1	-78.8		3.09489e-05	-78.8		269.205	-78.8
0.863772	-78.7		11332.9	-78.7		3.08032e-05	-78.7		268.537	-78.7
0.861883	-78.6		11304.8	-78.6		3.06581e-05	-78.6		267.87	-78.6
0.859996	-78.5		11276.7	-78.5		3.05134e-05	-78.5		267.205	-78.5
0.85811	-78.4		11248.8	-78.4		3.03694e-05	-78.4		266.542	-78.4
0.856226	-78.3		11220.9	-78.3		3.02258e-05	-78.3		265.88	-78.3
0.854343	-78.2		11193	-78.2		3.00828e-05	-78.2		265.22	-78.2
0.852462	-78.1		11165.3	-78.1		2.99403e-05	-78.1		264.562	-78.1
0.850583	-78		11137.6	-78		2.97983e-05	-78		263.905	-78
0.848706	-77.9		11110	-77.9		2.96569e-05	-77.9		263.25	-77.9
0.84683	-77.8		11082.4	-77.8		2.9516e-05	-77.8		262.597	-77.8
0.844956	-77.7		11054.9	-77.7		2.93756e-05	-77.7		261.945	-77.7
0.843084	-77.6		11027.5	-77.6		2.92357e-05	-77.6		261.295	-77.6
0.841213	-77.5		11000.2	-77.5		2.90964e-05	-77.5		260.647	-77.5
0.839344	-77.4		10972.9	-77.4		2.89575e-05	-77.4		260	-77.4
0.837477	-77.3		10945.7	-77.3		2.88192e-05	-77.3		259.355	-77.3
0.835612	-77.2		10918.5	-77.2		2.86814e-05	-77.2		258.711	-77.2
0.833748	-77.1		10891.5	-77.1		2.85441e-05	-77.1		258.069	-77.1
0.831886	-77		10864.4	-77		2.84074e-05	-77		257.429	-77
0.830026	-76.9		10837.5	-76.9		2.82711e-05	-76.9		256.79	-76.9
0.828167	-76.8		10810.6	-76.8		2.81354e-05	-76.8		256.153	-76.8
0.82631	-76.7		10783.8	-76.7		2.80002e-05	-76.7		255.518	-76.7
0.824455	-76.6		10757.1	-76.6		2.78655e-05	-76.6		254.884	-76.6
0.822602	-76.5		10730.4	-76.5		2.77313e-05	-76.5		254.252	-76.5
0.82075	-76.4		10703.8	-76.4		2.75976e-05	-76.4		253.621	-76.4
0.8189	-76.3		10677.2	-76.3		2.74644e-05	-76.3		252.992	-76.3
0.817052	-76.2		10650.8	-76.2		2.73317e-05	-76.2		252.365	-76.2
0.815206	-76.1		10624.4	-76.1		2.71995e-05	-76.1		251.739	-76.1
0.813361	-76		10598	-76		2.70679e-05	-76		251.114	-76
0.811519	-75.9		10571.7	-75.9		2.69367e-05	-75.9		250.492	-75.9
0.809678	-75.8		10545.5	-75.8		2.6806e-05	-75.8		249.87	-75.8
0.807838	-75.7		10519.4	-75.7		2.66759e-05	-75.7		249.251	-75.7
0.806001	-75.6		10493.3	-75.6		2.65462e-05	-75.6		248.633	-75.6
0.804165	-75.5		10467.3	-75.5		2.6417e-05	-75.5		248.016	-75.5
0.802331	-75.4		10441.3	-75.4		2.62884e-05	-75.4		247.401	-75.4
0.800499	-75.3		10415.4	-75.3		2.61602e-05	-75.3		246.788	-75.3
0.798669	-75.2		10389.6	-75.2		2.60325e-05	-75.2		246.176	-75.2
0.79684	-75.1		10363.8	-75.1		2.59053e-05	-75.1		245.566	-75.1
0.795014	-75		10338.1	-75		2.57787e-05	-75		244.957	-75
0.793189	-74.9		10312.5	-74.9		2.56525e-05	-74.9		244.35	-74.9
0.791365	-74.8		10286.9	-74.8		2.55267e-05	-74.8		243.744	-74.8
0.789544	-74.7		10261.4	-74.7		2.54015e-05	-74.7		243.14	-74.7
0.787724	-74.6		10236	-74.6		2.52768e-05	-74.6		242.537	-74.6
0.785907	-74.5		10210.6	-74.5		2.51526e-05	-74.5		241.936	-74.5
0.784091	-74.4		10185.3	-74.4		2.50288e-05	-74.4		241.336	-74.4
0.782277	-74.3		10160.1	-74.3		2.49055e-05	-74.3		240.738	-74.3
0.780464	-74.2		10134.9	-74.2		2.47827e-05	-74.2		240.141	-74.2
0.778654	-74.1		10109.7	-74.1		2.46604e-05	-74.1		239.546	-74.1
0.776845	-74		10084.7	-74		2.45386e-05	-74		238.953	-74
0.775038	-73.9		10059.7	-73.9		2.44173e-05	-73.9		238.361	-73.9
0.773233	-73.8		10034.7	-73.8		2.42964e-05	-73.8		237.77	-73.8
0.77143	-73.7		10009.9	-73.7		2.4176e-05	-73.7		237.181	-73.7
0.769629	-73.6		9985.03	-73.6		2.40561e-05	-73.6		236.593	-73.6
0.76783	-73.5		9960.28	-73.5		2.39367e-05	-73.5		236.007	-73.5
0.766032	-73.4		9935.59	-73.4		2.38177e-05	-73.4		235.422	-73.4
0.764236	-73.3		9910.96	-73.3		2.36992e-05	-73.3		234.839	-73.3
0.762442	-73.2		9886.39	-73.2		2.35812e-05	-73.2		234.257	-73.2
0.76065	-73.1		9861.88	-73.1		2.34636e-05	-73.1		233.677	-73.1
0.75886	-73		9837.43	-73		2.33466e-05	-73		233.098	-73
0.757072	-72.9		9813.05	-72.9		2.323e-05	-72.9		232.521	-72.9
0.755285	-72.8		9788.72	-72.8		2.31138e-05	-72.8		231.945	-72.8
0.753501	-72.7		9764.45	-72.7		2.29981e-05	-72.7		231.37	-72.7
0.751718	-72.6		9740.25	-72.6		2.28829e-05	-72.6		230.797	-72.6
0.749937	-72.5		9716.11	-72.5		2.27682e-05	-72.5		230.226	-72.5
0.748158	-72.4		9692.02	-72.4		2.26539e-05	-72.4		229.656	-72.4
0.746381	-72.3		9668	-72.3		2.25401e-05	-72.3		229.087	-72.3
0.744606	-72.2		9644.03	-72.2		2.24267e-05	-72.2		228.52	-72.2
0.742833	-72.1		9620.13	-72.1		2.23138e-05	-72.1		227.954	-72.1
0.741061	-72		9596.28	-72		2.22014e-05	-72		227.389	-72
0.739292	-71.9		9572.49	-71.9		2.20894e-05	-71.9		226.826	-71.9
0.737524	-71.8		9548.77	-71.8		2.19778e-05	-71.8		226.265	-71.8
0.735758	-71.7		9525.1	-71.7		2.18668e-05	-71.7		225.705	-71.7
0.733995	-71.6		9501.49	-71.6		2.17561e-05	-71.6		225.146	-71.6
0.732233	-71.5		9477.94	-71.5		2.1646e-05	-71.5		224.589	-71.5
0.730473	-71.4		9454.45	-71.4		2.15362e-05	-71.4		224.033	-71.4
0.728715	-71.3		9431.01	-71.3		2.1427e-05	-71.3		223.478	-71.3
0.726959	-71.2		9407.64	-71.2		2.13181e-05	-71.2		222.925	-71.2
0.725204	-71.1		9384.32	-71.1		2.12098e-05	-71.1		222.373	-71.1
0.723452	-71		9361.06	-71		2.11018e-05	-71		221.823	-71
0.721702	-70.9		9337.86	-70.9		2.09943e-05	-70.9		221.274	-70.9
0.719953	-70.8		9314.72	-70.8		2.08873e-05	-70.8		220.726	-70.8
0.718207	-70.7		9291.63	-70.7		2.07807e-05	-70.7		220.18	-70.7
0.716462	-70.6		9268.61	-70.6		2.06745e-05	-70.6		219.635	-70.6
0.71472	-70.5		9245.64	-70.5		2.05688e-05	-70.5		219.092	-70.5
0.712979	-70.4		9222.72	-70.4		2.04635e-05	-70.4		218.55	-70.4
0.71124	-70.3		9199.87	-70.3		2.03587e-05	-70.3		218.009	-70.3
0.709504	-70.2		9177.07	-70.2		2.02543e-05	-70.2		217.47	-70.2
0.707769	-70.1		9154.32	-70.1		2.01503e-05	-70.1		216.932	-70.1
0.706036	-70		9131.64	-70		2.00468e-05	-70		216.395	-70
0.704305	-69.9		9109.01	-69.9		1.99437e-05	-69.9		215.86	-69.9
0.702576	-69.8		9086.43	-69.8		1.9841e-05	-69.8		215.326	-69.8
0.700849	-69.7		9063.92	-69.7		1.97388e-05	-69.7		214.793	-69.7
0.699124	-69.6		9041.45	-69.6		1.96369e-05	-69.6		214.262	-69.6
0.697401	-69.5		9019.05	-69.5		1.95356e-05	-69.5		213.732	-69.5
0.69568	-69.4		8996.7	-69.4		1.94346e-05	-69.4		213.203	-69.4
0.693961	-69.3		8974.4	-69.3		1.93341e-05	-69.3		212.676	-69.3
0.692244	-69.2		8952.17	-69.2		1.9234e-05	-69.2		212.15	-69.2
0.690529	-69.1		8929.98	-69.1		1.91343e-05	-69.1		211.625	-69.1
0.688816	-69		8907.85	-69		1.9035e-05	-69		211.102	-69
0.687105	-68.9		8885.78	-68.9		1.89362e-05	-68.9		210.58	-68.9
0.685396	-68.8		8863.76	-68.8		1.88378e-05	-68.8		210.06	-68.8
0.683689	-68.7		8841.8	-68.7		1.87398e-05	-68.7		209.54	-68.7
0.681984	-68.6		8819.89	-68.6		1.86422e-05	-68.6		209.022	-68.6
0.680281	-68.5		8798.04	-68.5		1.8545e-05	-68.5		208.505	-68.5
0.678579	-68.4		8776.24	-68.4		1.84483e-05	-68.4		207.99	-68.4
0.67688	-68.3		8754.49	-68.3		1.83519e-05	-68.3		207.476	-68.3
0.675183	-68.2		8732.8	-68.2		1.8256e-05	-68.2		206.963	-68.2
0.673488	-68.1		8711.16	-68.1		1.81605e-05	-68.1		206.452	-68.1
0.671795	-68		8689.58	-68		1.80654e-05	-68		205.941	-68
0.670104	-67.9		8668.05	-67.9		1.79707e-05	-67.9		205.432	-67.9
0.668416	-67.8		8646.58	-67.8		1.78764e-05	-67.8		204.925	-67.8
0.666729	-67.7		8625.15	-67.7		1.77825e-05	-67.7		204.418	-67.7
0.665044	-67.6		8603.78	-67.6		1.7689e-05	-67.6		203.913	-67.6
0.663361	-67.5		8582.47	-67.5		1.7596e-05	-67.5		203.409	-67.5
0.66168	-67.4		8561.2	-67.4		1.75033e-05	-67.4		202.907	-67.4
0.660001	-67.3		8539.99	-67.3		1.7411e-05	-67.3		202.405	-67.3
0.658325	-67.2		8518.84	-67.2		1.73192e-05	-67.2		201.905	-67.2
0.65665	-67.1		8497.73	-67.1		1.72277e-05	-67.1		201.406	-67.1
0.654977	-67		8476.68	-67		1.71366e-05	-67		200.909	-67
0.653307	-66.9		8455.68	-66.9		1.7046e-05	-66.9		200.413	-66.9
0.651638	-66.8		8434.73	-66.8		1.69557e-05	-66.8		199.918	-66.8
0.649972	-66.7		8413.84	-66.7		1.68658e-05	-66.7		199.424	-66.7
0.648308	-66.6		8392.99	-66.6		1.67763e-05	-66.6		198.931	-66.6
0.646645	-66.5		8372.2	-66.5		1.66873e-05	-66.5		198.44	-66.5
0.644985	-66.4		8351.46	-66.4		1.65986e-05	-66.4		197.95	-66.4
0.643327	-66.3		8330.77	-66.3		1.65102e-05	-66.3		197.461	-66.3
0.641671	-66.2		8310.14	-66.2		1.64223e-05	-66.2		196.973	-66.2
0.640017	-66.1		8289.55	-66.1		1.63348e-05	-66.1		196.487	-66.1
0.638365	-66		8269.02	-66		1.62476e-05	-66		196.002	-66
0.636715	-65.9		8248.54	-65.9		1.61609e-05	-65.9		195.518	-65.9
0.635068	-65.8		8228.1	-65.8		1.60745e-05	-65.8		195.035	-65.8
0.633422	-65.7		8207.72	-65.7		1.59885e-05	-65.7		194.554	-65.7
0.631779	-65.6		8187.39	-65.6		1.59029e-05	-65.6		194.073	-65.6
0.630137	-65.5		8167.11	-65.5		1.58177e-05	-65.5		193.594	-65.5
0.628498	-65.4		8146.88	-65.4		1.57328e-05	-65.4		193.117	-65.4
0.626861	-65.3		8126.7	-65.3		1.56483e-05	-65.3		192.64	-65.3
0.625226	-65.2		8106.57	-65.2		1.55643e-05	-65.2		192.164	-65.2
0.623593	-65.1		8086.5	-65.1		1.54805e-05	-65.1		191.69	-65.1
0.621962	-65		8066.47	-65		1.53972e-05	-65		191.217	-65
0.620333	-64.9		8046.49	-64.9		1.53142e-05	-64.9		190.745	-64.9
0.618706	-64.8		8026.56	-64.8		1.52316e-05	-64.8		190.275	-64.8
0.617082	-64.7		8006.68	-64.7		1.51494e-05	-64.7		189.805	-64.7
0.615459	-64.6		7986.85	-64.6		1.50675e-05	-64.6		189.337	-64.6
0.613839	-64.5		7967.07	-64.5		1.4986e-05	-64.5		188.87	-64.5
0.612221	-64.4		7947.34	-64.4		1.49049e-05	-64.4		188.404	-64.4
0.610605	-64.3		7927.66	-64.3		1.48242e-05	-64.3		187.939	-64.3
0.608991	-64.2		7908.02	-64.2		1.47438e-05	-64.2		187.475	-64.2
0.60738	-64.1		7888.44	-64.1		1.46638e-05	-64.1		187.013	-64.1
0.60577	-64		7868.9	-64		1.45841e-05	-64		186.551	-64
0.604163	-63.9		7849.41	-63.9		1.45048e-05	-63.9		186.091	-63.9
0.602557	-63.8		7829.98	-63.8		1.44259e-05	-63.8		185.632	-63.8
0.600954	-63.7		7810.59	-63.7		1.43473e-05	-63.7		185.175	-63.7
0.599353	-63.6		7791.24	-63.6		1.4269e-05	-63.6		184.718	-63.6
0.597754	-63.5		7771.95	-63.5		1.41912e-05	-63.5		184.262	-63.5
0.596158	-63.4		7752.7	-63.4		1.41137e-05	-63.4		183.808	-63.4
0.594563	-63.3		7733.51	-63.3		1.40365e-05	-63.3		183.355	-63.3
0.592971	-63.2		7714.36	-63.2		1.39597e-05	-63.2		182.903	-63.2
0.591381	-63.1		7695.25	-63.1		1.38833e-05	-63.1		182.452	-63.1
0.589793	-63		7676.2	-63		1.38072e-05	-63		182.002	-63
0.588207	-62.9		7657.19	-62.9		1.37314e-05	-62.9		181.553	-62.9
0.586623	-62.8		7638.23	-62.8		1.3656e-05	-62.8		181.106	-62.8
0.585042	-62.7		7619.32	-62.7		1.3581e-05	-62.7		180.659	-62.7
0.583463	-62.6		7600.45	-62.6		1.35063e-05	-62.6		180.214	-62.6
0.581886	-62.5		7581.63	-62.5		1.34319e-05	-62.5		179.77	-62.5
0.580311	-62.4		7562.86	-62.4		1.33579e-05	-62.4		179.327	-62.4
0.578738	-62.3		7544.13	-62.3		1.32843e-05	-62.3		178.885	-62.3
0.577168	-62.2		7525.45	-62.2		1.32109e-05	-62.2		178.444	-62.2
0.575599	-62.1		7506.82	-62.1		1.31379e-05	-62.1		178.004	-62.1
0.574033	-62		7488.24	-62		1.30653e-05	-62		177.566	-62
0.572469	-61.9		7469.7	-61.9		1.2993e-05	-61.9		177.128	-61.9
0.570908	-61.8		7451.2	-61.8		1.2921e-05	-61.8		176.692	-61.8
0.569348	-61.7		7432.76	-61.7		1.28494e-05	-61.7		176.257	-61.7
0.567791	-61.6		7414.35	-61.6		1.27781e-05	-61.6		175.822	-61.6
0.566236	-61.5		7396	-61.5		1.27071e-05	-61.5		175.389	-61.5
0.564683	-61.4		7377.69	-61.4		1.26365e-05	-61.4		174.957	-61.4
0.563132	-61.3		7359.42	-61.3		1.25662e-05	-61.3		174.526	-61.3
0.561584	-61.2		7341.2	-61.2		1.24962e-05	-61.2		174.097	-61.2
0.560038	-61.1		7323.03	-61.1		1.24266e-05	-61.1		173.668	-61.1
0.558494	-61		7304.9	-61		1.23573e-05	-61		173.24	-61
0.556952	-60.9		7286.82	-60.9		1.22883e-05	-60.9		172.814	-60.9
0.555412	-60.8		7268.78	-60.8		1.22197e-05	-60.8		172.388	-60.8
0.553875	-60.7		7250.79	-60.7		1.21513e-05	-60.7		171.964	-60.7
0.55234	-60.6		7232.84	-60.6		1.20833e-05	-60.6		171.54	-60.6
0.550807	-60.5		7214.93	-60.5		1.20156e-05	-60.5		171.118	-60.5
0.549277	-60.4		7197.07	-60.4		1.19483e-05	-60.4		170.697	-60.4
0.547749	-60.3		7179.26	-60.3		1.18812e-05	-60.3		170.276	-60.3
0.546222	-60.2		7161.49	-60.2		1.18145e-05	-60.2		169.857	-60.2
0.544699	-60.1		7143.76	-60.1		1.17481e-05	-60.1		169.439	-60.1
0.543177	-60		7126.08	-60		1.1682e-05	-60		169.022	-60
0.541658	-59.9		7108.44	-59.9		1.16162e-05	-59.9		168.606	-59.9
0.540141	-59.8		7090.84	-59.8		1.15508e-05	-59.8		168.191	-59.8
0.538626	-59.7		7073.29	-59.7		1.14856e-05	-59.7		167.777	-59.7
0.537113	-59.6		7055.79	-59.6		1.14208e-05	-59.6		167.365	-59.6
0.535603	-59.5		7038.32	-59.5		1.13563e-05	-59.5		166.953	-59.5
0.534095	-59.4		7020.9	-59.4		1.12921e-05	-59.4		166.542	-59.4
0.532589	-59.3		7003.53	-59.3		1.12282e-05	-59.3		166.132	-59.3
0.531086	-59.2		6986.19	-59.2		1.11646e-05	-59.2		165.724	-59.2
0.529585	-59.1		6968.9	-59.1		1.11013e-05	-59.1		165.316	-59.1
0.528086	-59		6951.66	-59		1.10383e-05	-59		164.909	-59
0.526589	-58.9		6934.45	-58.9		1.09757e-05	-58.9		164.504	-58.9
0.525095	-58.8		6917.29	-58.8		1.09133e-05	-58.8		164.099	-58.8
0.523603	-58.7		6900.17	-58.7		1.08512e-05	-58.7		163.696	-58.7
0.522113	-58.6		6883.09	-58.6		1.07895e-05	-58.6		163.293	-58.6
0.520626	-58.5		6866.06	-58.5		1.0728e-05	-58.5		162.892	-58.5
0.51914	-58.4		6849.07	-58.4		1.06668e-05	-58.4		162.491	-58.4
0.517657	-58.3		6832.12	-58.3		1.0606e-05	-58.3		162.091	-58.3
0.516177	-58.2		6815.21	-58.2		1.05454e-05	-58.2		161.693	-58.2
0.514698	-58.1		6798.35	-58.1		1.04851e-05	-58.1		161.295	-58.1
0.513222	-58		6781.53	-58		1.04251e-05	-58		160.899	-58
0.511749	-57.9		6764.74	-57.9		1.03655e-05	-57.9		160.503	-57.9
0.510277	-57.8		6748	-57.8		1.03061e-05	-57.8		160.109	-57.8
0.508808	-57.7		6731.31	-57.7		1.0247e-05	-57.7		159.715	-57.7
0.507341	-57.6		6714.65	-57.6		1.01882e-05	-57.6		159.323	-57.6
0.505877	-57.5		6698.04	-57.5		1.01296e-05	-57.5		158.931	-57.5
0.504415	-57.4		6681.46	-57.4		1.00714e-05	-57.4		158.541	-57.4
0.502955	-57.3		6664.93	-57.3		1.00135e-05	-57.3		158.151	-57.3
0.501497	-57.2		6648.44	-57.2		9.9558e-06	-57.2		157.763	-57.2
0.500042	-57.1		6631.99	-57.1		9.89842e-06	-57.1		157.375	-57.1
0.498589	-57		6615.58	-57		9.84133e-06	-57		156.988	-57
0.497139	-56.9		6599.21	-56.9		9.78453e-06	-56.9		156.603	-56.9
0.49569	-56.8		6582.89	-56.8		9.728e-06	-56.8		156.218	-56.8
0.494245	-56.7		6566.6	-56.7		9.67176e-06	-56.7		155.834	-56.7
0.492801	-56.6		6550.35	-56.6		9.6158e-06	-56.6		155.452	-56.6
0.49136	-56.5		6534.15	-56.5		9.56011e-06	-56.5		155.07	-56.5
0.489921	-56.4		6517.98	-56.4		9.50471e-06	-56.4		154.689	-56.4
0.488484	-56.3		6501.86	-56.3		9.44958e-06	-56.3		154.309	-56.3
0.48705	-56.2		6485.77	-56.2		9.39472e-06	-56.2		153.93	-56.2
0.485618	-56.1		6469.73	-56.1		9.34014e-06	-56.1		153.552	-56.1
0.484188	-56		6453.72	-56		9.28584e-06	-56		153.175	-56
0.482761	-55.9		6437.76	-55.9		9.2318e-06	-55.9		152.799	-55.9
0.481336	-55.8		6421.83	-55.8		9.17804e-06	-55.8		152.424	-55.8
0.479914	-55.7		6405.95	-55.7		9.12455e-06	-55.7		152.05	-55.7
0.478494	-55.6		6390.1	-55.6		9.07133e-06	-55.6		151.677	-55.6
0.477076	-55.5		6374.29	-55.5		9.01837e-06	-55.5		151.304	-55.5
0.47566	-55.4		6358.53	-55.4		8.96568e-06	-55.4		150.933	-55.4
0.474247	-55.3		6342.8	-55.3		8.91326e-06	-55.3		150.563	-55.3
0.472836	-55.2		6327.11	-55.2		8.86111e-06	-55.2		150.193	-55.2
0.471428	-55.1		6311.46	-55.1		8.80921e-06	-55.1		149.825	-55.1
0.470022	-55		6295.85	-55		8.75758e-06	-55		149.457	-55
0.468618	-54.9		6280.27	-54.9		8.70622e-06	-54.9		149.09	-54.9
0.467217	-54.8		6264.74	-54.8		8.65511e-06	-54.8		148.724	-54.8
0.465818	-54.7		6249.25	-54.7		8.60427e-06	-54.7		148.36	-54.7
0.464422	-54.6		6233.79	-54.6		8.55368e-06	-54.6		147.996	-54.6
0.463027	-54.5		6218.37	-54.5		8.50335e-06	-54.5		147.633	-54.5
0.461636	-54.4		6202.99	-54.4		8.45328e-06	-54.4		147.271	-54.4
0.460246	-54.3		6187.65	-54.3		8.40346e-06	-54.3		146.909	-54.3
0.458859	-54.2		6172.35	-54.2		8.3539e-06	-54.2		146.549	-54.2
0.457474	-54.1		6157.08	-54.1		8.30459e-06	-54.1		146.19	-54.1
0.456092	-54		6141.86	-54		8.25554e-06	-54		145.831	-54
0.454712	-53.9		6126.67	-53.9		8.20673e-06	-53.9		145.474	-53.9
0.453335	-53.8		6111.52	-53.8		8.15818e-06	-53.8		145.117	-53.8
0.45196	-53.7		6096.4	-53.7		8.10988e-06	-53.7		144.761	-53.7
0.450587	-53.6		6081.33	-53.6		8.06182e-06	-53.6		144.406	-53.6
0.449216	-53.5		6066.29	-53.5		8.01402e-06	-53.5		144.052	-53.5
0.447848	-53.4		6051.29	-53.4		7.96646e-06	-53.4		143.699	-53.4
0.446483	-53.3		6036.32	-53.3		7.91915e-06	-53.3		143.347	-53.3
0.44512	-53.2		6021.4	-53.2		7.87208e-06	-53.2		142.996	-53.2
0.443759	-53.1		6006.51	-53.1		7.82525e-06	-53.1		142.645	-53.1
0.4424	-53		5991.65	-53		7.77867e-06	-53		142.296	-53
0.441044	-52.9		5976.84	-52.9		7.73233e-06	-52.9		141.947	-52.9
0.439691	-52.8		5962.06	-52.8		7.68623e-06	-52.8		141.6	-52.8
0.43834	-52.7		5947.32	-52.7		7.64037e-06	-52.7		141.253	-52.7
0.436991	-52.6		5932.61	-52.6		7.59475e-06	-52.6		140.907	-52.6
0.435644	-52.5		5917.95	-52.5		7.54937e-06	-52.5		140.561	-52.5
0.4343	-52.4		5903.31	-52.4		7.50422e-06	-52.4		140.217	-52.4
0.432959	-52.3		5888.72	-52.3		7.45931e-06	-52.3		139.874	-52.3
0.43162	-52.2		5874.16	-52.2		7.41463e-06	-52.2		139.531	-52.2
0.430283	-52.1		5859.64	-52.1		7.37019e-06	-52.1		139.189	-52.1
0.428949	-52		5845.15	-52		7.32598e-06	-52		138.849	-52
0.427617	-51.9		5830.7	-51.9		7.28201e-06	-51.9		138.509	-51.9
0.426287	-51.8		5816.28	-51.8		7.23826e-06	-51.8		138.17	-51.8
0.42496	-51.7		5801.9	-51.7		7.19474e-06	-51.7		137.831	-51.7
0.423636	-51.6		5787.56	-51.6		7.15146e-06	-51.6		137.494	-51.6
0.422313	-51.5		5773.25	-51.5		7.1084e-06	-51.5		137.157	-51.5
0.420993	-51.4		5758.98	-51.4		7.06557e-06	-51.4		136.822	-51.4
0.419676	-51.3		5744.75	-51.3		7.02296e-06	-51.3		136.487	-51.3
0.418361	-51.2		5730.55	-51.2		6.98058e-06	-51.2		136.153	-51.2
0.417049	-51.1		5716.38	-51.1		6.93843e-06	-51.1		135.82	-51.1
0.415738	-51		5702.25	-51		6.8965e-06	-51		135.487	-51
0.414431	-50.9		5688.15	-50.9		6.85479e-06	-50.9		135.156	-50.9
0.413125	-50.8		5674.09	-50.8		6.8133e-06	-50.8		134.825	-50.8
0.411823	-50.7		5660.07	-50.7		6.77203e-06	-50.7		134.495	-50.7
0.410522	-50.6		5646.08	-50.6		6.73098e-06	-50.6		134.166	-50.6
0.409224	-50.5		5632.12	-50.5		6.69015e-06	-50.5		133.838	-50.5
0.407929	-50.4		5618.2	-50.4		6.64954e-06	-50.4		133.511	-50.4
0.406636	-50.3		5604.32	-50.3		6.60915e-06	-50.3		133.184	-50.3
0.405345	-50.2		5590.47	-50.2		6.56897e-06	-50.2		132.858	-50.2
0.404057	-50.1		5576.65	-50.1		6.52901e-06	-50.1		132.533	-50.1
0.402771	-50		5562.87	-50		6.48926e-06	-50		132.209	-50
0.401488	-49.9		5549.12	-49.9		6.44972e-06	-49.9		131.886	-49.9
0.400207	-49.8		5535.4	-49.8		6.41039e-06	-49.8		131.564	-49.8
0.398928	-49.7		5521.72	-49.7		6.37128e-06	-49.7		131.242	-49.7
0.397652	-49.6		5508.08	-49.6		6.33238e-06	-49.6		130.921	-49.6
0.396379	-49.5		5494.47	-49.5		6.29369e-06	-49.5		130.601	-49.5
0.395108	-49.4		5480.89	-49.4		6.2552e-06	-49.4		130.282	-49.4
0.393839	-49.3		5467.34	-49.3		6.21692e-06	-49.3		129.964	-49.3
0.392573	-49.2		5453.83	-49.2		6.17885e-06	-49.2		129.646	-49.2
0.391309	-49.1		5440.36	-49.1		6.14099e-06	-49.1		129.329	-49.1
0.390048	-49		5426.91	-49		6.10333e-06	-49		129.013	-49
0.388789	-48.9		5413.5	-48.9		6.06587e-06	-48.9		128.698	-48.9
0.387532	-48.8		5400.13	-48.8		6.02862e-06	-48.8		128.384	-48.8
0.386278	-48.7		5386.78	-48.7		5.99157e-06	-48.7		128.07	-48.7
0.385027	-48.6		5373.47	-48.6		5.95472e-06	-48.6		127.757	-48.6
0.383778	-48.5		5360.2	-48.5		5.91807e-06	-48.5		127.445	-48.5
0.382531	-48.4		5346.95	-48.4		5.88162e-06	-48.4		127.134	-48.4
0.381287	-48.3		5333.74	-48.3		5.84537e-06	-48.3		126.823	-48.3
0.380045	-48.2		5320.56	-48.2		5.80932e-06	-48.2		126.514	-48.2
0.378806	-48.1		5307.42	-48.1		5.77346e-06	-48.1		126.205	-48.1
0.377569	-48		5294.31	-48		5.7378e-06	-48		125.897	-48
0.376335	-47.9		5281.23	-47.9		5.70234e-06	-47.9		125.589	-47.9
0.375103	-47.8		5268.18	-47.8		5.66707e-06	-47.8		125.283	-47.8
0.373874	-47.7		5255.16	-47.7		5.63199e-06	-47.7		124.977	-47.7
0.372647	-47.6		5242.18	-47.6		5.59711e-06	-47.6		124.672	-47.6
0.371422	-47.5		5229.23	-47.5		5.56241e-06	-47.5		124.368	-47.5
0.3702	-47.4		5216.31	-47.4		5.52791e-06	-47.4		124.064	-47.4
0.368981	-47.3		5203.43	-47.3		5.4936e-06	-47.3		123.761	-47.3
0.367764	-47.2		5190.57	-47.2		5.45948e-06	-47.2		123.459	-47.2
0.366549	-47.1		5177.75	-47.1		5.42554e-06	-47.1		123.158	-47.1
0.365337	-47		5164.96	-47		5.3918e-06	-47		122.858	-47
0.364128	-46.9		5152.2	-46.9		5.35824e-06	-46.9		122.558	-46.9
0.36292	-46.8		5139.48	-46.8		5.32486e-06	-46.8		122.259	-46.8
0.361716	-46.7		5126.78	-46.7		5.29167e-06	-46.7		121.961	-46.7
0.360513	-46.6		5114.12	-46.6		5.25867e-06	-46.6		121.663	-46.6
0.359314	-46.5		5101.49	-46.5		5.22584e-06	-46.5		121.367	-46.5
0.358116	-46.4		5088.89	-46.4		5.1932e-06	-46.4		121.071	-46.4
0.356921	-46.3		5076.32	-46.3		5.16075e-06	-46.3		120.776	-46.3
0.355729	-46.2		5063.78	-46.2		5.12847e-06	-46.2		120.481	-46.2
0.354539	-46.1		5051.27	-46.1		5.09637e-06	-46.1		120.187	-46.1
0.353352	-46		5038.8	-46		5.06445e-06	-46		119.894	-46
0.352167	-45.9		5026.35	-45.9		5.03271e-06	-45.9		119.602	-45.9
0.350984	-45.8		5013.94	-45.8		5.00115e-06	-45.8		119.311	-45.8
0.349804	-45.7		5001.56	-45.7		4.96976e-06	-45.7		119.02	-45.7
0.348627	-45.6		4989.21	-45.6		4.93855e-06	-45.6		118.73	-45.6
0.347452	-45.5		4976.89	-45.5		4.90751e-06	-45.5		118.441	-45.5
0.346279	-45.4		4964.6	-45.4		4.87665e-06	-45.4		118.152	-45.4
0.345109	-45.3		4952.34	-45.3		4.84596e-06	-45.3		117.864	-45.3
0.343942	-45.2		4940.11	-45.2		4.81544e-06	-45.2		117.577	-45.2
0.342776	-45.1		4927.91	-45.1		4.7851e-06	-45.1		117.291	-45.1
0.341614	-45		4915.74	-45		4.75493e-06	-45		117.005	-45
0.340454	-44.9		4903.6	-44.9		4.72492e-06	-44.9		116.72	-44.9
0.339296	-44.8		4891.5	-44.8		4.69509e-06	-44.8		116.436	-44.8
0.338141	-44.7		4879.42	-44.7		4.66542e-06	-44.7		116.152	-44.7
0.336988	-44.6		4867.37	-44.6		4.63592e-06	-44.6		115.869	-44.6
0.335838	-44.5		4855.35	-44.5		4.60659e-06	-44.5		115.587	-44.5
0.33469	-44.4		4843.37	-44.4		4.57743e-06	-44.4		115.306	-44.4
0.333545	-44.3		4831.41	-44.3		4.54843e-06	-44.3		115.025	-44.3
0.332402	-44.2		4819.48	-44.2		4.51959e-06	-44.2		114.745	-44.2
0.331261	-44.1		4807.58	-44.1		4.49092e-06	-44.1		114.466	-44.1
0.330123	-44		4795.71	-44		4.46242e-06	-44		114.187	-44
0.328988	-43.9		4783.87	-43.9		4.43407e-06	-43.9		113.909	-43.9
0.327855	-43.8		4772.06	-43.8		4.40589e-06	-43.8		113.632	-43.8
0.326725	-43.7		4760.28	-43.7		4.37786e-06	-43.7		113.356	-43.7
0.325597	-43.6		4748.53	-43.6		4.35e-06	-43.6		113.08	-43.6
0.324471	-43.5		4736.81	-43.5		4.32229e-06	-43.5		112.805	-43.5
0.323348	-43.4		4725.12	-43.4		4.29475e-06	-43.4		112.531	-43.4
0.322228	-43.3		4713.45	-43.3		4.26736e-06	-43.3		112.257	-43.3
0.32111	-43.2		4701.82	-43.2		4.24013e-06	-43.2		111.984	-43.2
0.319994	-43.1		4690.21	-43.1		4.21305e-06	-43.1		111.712	-43.1
0.318881	-43		4678.64	-43		4.18613e-06	-43		111.44	-43
0.317771	-42.9		4667.09	-42.9		4.15937e-06	-42.9		111.169	-42.9
0.316662	-42.8		4655.57	-42.8		4.13276e-06	-42.8		110.899	-42.8
0.315557	-42.7		4644.08	-42.7		4.1063e-06	-42.7		110.629	-42.7
0.314454	-42.6		4632.62	-42.6		4.07999e-06	-42.6		110.36	-42.6
0.313353	-42.5		4621.18	-42.5		4.05384e-06	-42.5		110.092	-42.5
0.312255	-42.4		4609.78	-42.4		4.02784e-06	-42.4		109.824	-42.4
0.311159	-42.3		4598.4	-42.3		4.00198e-06	-42.3		109.557	-42.3
0.310066	-42.2		4587.05	-42.2		3.97628e-06	-42.2		109.291	-42.2
0.308975	-42.1		4575.73	-42.1		3.95072e-06	-42.1		109.026	-42.1
0.307887	-42		4564.44	-42		3.92532e-06	-42		108.761	-42
0.306801	-41.9		4553.18	-41.9		3.90006e-06	-41.9		108.497	-41.9
0.305718	-41.8		4541.94	-41.8		3.87495e-06	-41.8		108.233	-41.8
0.304637	-41.7		4530.73	-41.7		3.84998e-06	-41.7		107.97	-41.7
0.303558	-41.6		4519.55	-41.6		3.82516e-06	-41.6		107.708	-41.6
0.302483	-41.5		4508.4	-41.5		3.80048e-06	-41.5		107.446	-41.5
0.301409	-41.4		4497.28	-41.4		3.77595e-06	-41.4		107.186	-41.4
0.300338	-41.3		4486.18	-41.3		3.75156e-06	-41.3		106.925	-41.3
0.29927	-41.2		4475.11	-41.2		3.72731e-06	-41.2		106.666	-41.2
0.298204	-41.1		4464.07	-41.1		3.7032e-06	-41.1		106.407	-41.1
0.29714	-41		4453.06	-41		3.67924e-06	-41		106.149	-41
0.296079	-40.9		4442.07	-40.9		3.65541e-06	-40.9		105.891	-40.9
0.295021	-40.8		4431.11	-40.8		3.63172e-06	-40.8		105.634	-40.8
0.293965	-40.7		4420.18	-40.7		3.60818e-06	-40.7		105.378	-40.7
0.292911	-40.6		4409.27	-40.6		3.58477e-06	-40.6		105.122	-40.6
0.29186	-40.5		4398.4	-40.5		3.5615e-06	-40.5		104.867	-40.5
0.290811	-40.4		4387.55	-40.4		3.53836e-06	-40.4		104.612	-40.4
0.289765	-40.3		4376.72	-40.3		3.51536e-06	-40.3		104.359	-40.3
0.288721	-40.2		4365.92	-40.2		3.4925e-06	-40.2		104.106	-40.2
0.28768	-40.1		4355.16	-40.1		3.46977e-06	-40.1		103.853	-40.1
0.286641	-40		4344.41	-40		3.44718e-06	-40		103.601	-40
0.285605	-39.9		4333.7	-39.9		3.42472e-06	-39.9		103.35	-39.9
0.284571	-39.8		4323.01	-39.8		3.40239e-06	-39.8		103.099	-39.8
0.28354	-39.7		4312.34	-39.7		3.38019e-06	-39.7		102.849	-39.7
0.282511	-39.6		4301.71	-39.6		3.35813e-06	-39.6		102.6	-39.6
0.281485	-39.5		4291.1	-39.5		3.33619e-06	-39.5		102.351	-39.5
0.280461	-39.4		4280.51	-39.4		3.31439e-06	-39.4		102.103	-39.4
0.279439	-39.3		4269.96	-39.3		3.29271e-06	-39.3		101.856	-39.3
0.27842	-39.2		4259.42	-39.2		3.27117e-06	-39.2		101.609	-39.2
0.277404	-39.1		4248.92	-39.1		3.24975e-06	-39.1		101.363	-39.1
0.276389	-39		4238.44	-39		3.22846e-06	-39		101.117	-39
0.275378	-38.9		4227.99	-38.9		3.20729e-06	-38.9		100.872	-38.9
0.274369	-38.8		4217.56	-38.8		3.18626e-06	-38.8		100.628	-38.8
0.273362	-38.7		4207.16	-38.7		3.16534e-06	-38.7		100.384	-38.7
0.272358	-38.6		4196.79	-38.6		3.14456e-06	-38.6		100.141	-38.6
0.271356	-38.5		4186.44	-38.5		3.12389e-06	-38.5		99.8986	-38.5
0.270357	-38.4		4176.11	-38.4		3.10335e-06	-38.4		99.6567	-38.4
0.26936	-38.3		4165.82	-38.3		3.08294e-06	-38.3		99.4155	-38.3
0.268365	-38.2		4155.54	-38.2		3.06264e-06	-38.2		99.1748	-38.2
0.267373	-38.1		4145.3	-38.1		3.04247e-06	-38.1		98.9347	-38.1
0.266384	-38		4135.08	-38		3.02242e-06	-38		98.6952	-38
0.265397	-37.9		4124.88	-37.9		3.00249e-06	-37.9		98.4564	-37.9
0.264412	-37.8		4114.71	-37.8		2.98267e-06	-37.8		98.2181	-37.8
0.26343	-37.7		4104.57	-37.7		2.96298e-06	-37.7		97.9804	-37.7
0.26245	-37.6		4094.45	-37.6		2.94341e-06	-37.6		97.7434	-37.6
0.261473	-37.5		4084.35	-37.5		2.92395e-06	-37.5		97.5069	-37.5
0.260498	-37.4		4074.28	-37.4		2.90461e-06	-37.4		97.271	-37.4
0.259526	-37.3		4064.24	-37.3		2.88539e-06	-37.3		97.0357	-37.3
0.258556	-37.2		4054.22	-37.2		2.86629e-06	-37.2		96.8011	-37.2
0.257589	-37.1		4044.23	-37.1		2.8473e-06	-37.1		96.567	-37.1
0.256624	-37		4034.26	-37		2.82842e-06	-37		96.3335	-37
0.255661	-36.9		4024.31	-36.9		2.80966e-06	-36.9		96.1005	-36.9
0.254701	-36.8		4014.39	-36.8		2.79101e-06	-36.8		95.8682	-36.8
0.253743	-36.7		4004.5	-36.7		2.77248e-06	-36.7		95.6364	-36.7
0.252788	-36.6		3994.63	-36.6		2.75406e-06	-36.6		95.4053	-36.6
0.251835	-36.5		3984.78	-36.5		2.73575e-06	-36.5		95.1747	-36.5
0.250885	-36.4		3974.96	-36.4		2.71755e-06	-36.4		94.9447	-36.4
0.249937	-36.3		3965.16	-36.3		2.69946e-06	-36.3		94.7153	-36.3
0.248992	-36.2		3955.39	-36.2		2.68148e-06	-36.2		94.4864	-36.2
0.248049	-36.1		3945.64	-36.1		2.66361e-06	-36.1		94.2582	-36.1
0.247108	-36		3935.92	-36		2.64585e-06	-36		94.0305	-36
0.24617	-35.9		3926.22	-35.9		2.6282e-06	-35.9		93.8033	-35.9
0.245234	-35.8		3916.54	-35.8		2.61066e-06	-35.8		93.5768	-35.8
0.244301	-35.7		3906.89	-35.7		2.59322e-06	-35.7		93.3508	-35.7
0.24337	-35.6		3897.26	-35.6		2.5759e-06	-35.6		93.1254	-35.6
0.242442	-35.5		3887.66	-35.5		2.55867e-06	-35.5		92.9005	-35.5
0.241516	-35.4		3878.08	-35.4		2.54156e-06	-35.4		92.6763	-35.4
0.240592	-35.3		3868.52	-35.3		2.52454e-06	-35.3		92.4526	-35.3
0.239671	-35.2		3858.99	-35.2		2.50764e-06	-35.2		92.2294	-35.2
0.238752	-35.1		3849.48	-35.1		2.49083e-06	-35.1		92.0068	-35.1
0.237836	-35		3840	-35		2.47413e-06	-35		91.7848	-35
0.236922	-34.9		3830.54	-34.9		2.45753e-06	-34.9		91.5633	-34.9
0.23601	-34.8		3821.1	-34.8		2.44104e-06	-34.8		91.3424	-34.8
0.235101	-34.7		3811.68	-34.7		2.42464e-06	-34.7		91.122	-34.7
0.234195	-34.6		3802.29	-34.6		2.40835e-06	-34.6		90.9022	-34.6
0.23329	-34.5		3792.93	-34.5		2.39216e-06	-34.5		90.683	-34.5
0.232388	-34.4		3783.58	-34.4		2.37607e-06	-34.4		90.4643	-34.4
0.231489	-34.3		3774.26	-34.3		2.36007e-06	-34.3		90.2461	-34.3
0.230592	-34.2		3764.96	-34.2		2.34418e-06	-34.2		90.0285	-34.2
0.229697	-34.1		3755.69	-34.1		2.32839e-06	-34.1		89.8115	-34.1
0.228805	-34		3746.44	-34		2.31269e-06	-34		89.595	-34
0.227915	-33.9		3737.21	-33.9		2.29709e-06	-33.9		89.379	-33.9
0.227028	-33.8		3728	-33.8		2.28158e-06	-33.8		89.1636	-33.8
0.226143	-33.7		3718.82	-33.7		2.26618e-06	-33.7		88.9487	-33.7
0.22526	-33.6		3709.66	-33.6		2.25087e-06	-33.6		88.7344	-33.6
0.22438	-33.5		3700.52	-33.5		2.23565e-06	-33.5		88.5206	-33.5
0.223502	-33.4		3691.41	-33.4		2.22053e-06	-33.4		88.3074	-33.4
0.222627	-33.3		3682.32	-33.3		2.2055e-06	-33.3		88.0947	-33.3
0.221754	-33.2		3673.25	-33.2		2.19057e-06	-33.2		87.8825	-33.2
0.220883	-33.1		3664.2	-33.1		2.17573e-06	-33.1		87.6708	-33.1
0.220015	-33		3655.18	-33		2.16098e-06	-33		87.4597	-33
0.219149	-32.9		3646.18	-32.9		2.14633e-06	-32.9		87.2491	-32.9
0.218285	-32.8		3637.2	-32.8		2.13176e-06	-32.8		87.0391	-32.8
0.217424	-32.7		3628.24	-32.7		2.11729e-06	-32.7		86.8295	-32.7
0.216566	-32.6		3619.31	-32.6		2.10291e-06	-32.6		86.6205	-32.6
0.215709	-32.5		3610.39	-32.5		2.08862e-06	-32.5		86.4121	-32.5
0.214855	-32.4		3601.5	-32.4		2.07442e-06	-32.4		86.2041	-32.4
0.214004	-32.3		3592.64	-32.3		2.06031e-06	-32.3		85.9967	-32.3
0.213154	-32.2		3583.79	-32.2		2.04628e-06	-32.2		85.7898	-32.2
0.212307	-32.1		3574.97	-32.1		2.03235e-06	-32.1		85.5834	-32.1
0.211463	-32		3566.16	-32		2.0185e-06	-32		85.3776	-32
0.210621	-31.9		3557.38	-31.9		2.00474e-06	-31.9		85.1722	-31.9
0.209781	-31.8		3548.63	-31.8		1.99106e-06	-31.8		84.9674	-31.8
0.208944	-31.7		3539.89	-31.7		1.97747e-06	-31.7		84.7631	-31.7
0.208108	-31.6		3531.18	-31.6		1.96397e-06	-31.6		84.5593	-31.6
0.207276	-31.5		3522.48	-31.5		1.95056e-06	-31.5		84.356	-31.5
0.206445	-31.4		3513.81	-31.4		1.93722e-06	-31.4		84.1532	-31.4
0.205617	-31.3		3505.16	-31.3		1.92398e-06	-31.3		83.951	-31.3
0.204792	-31.2		3496.53	-31.2		1.91081e-06	-31.2		83.7492	-31.2
0.203969	-31.1		3487.93	-31.1		1.89773e-06	-31.1		83.548	-31.1
0.203148	-31		3479.34	-31		1.88474e-06	-31		83.3472	-31
0.202329	-30.9		3470.78	-30.9		1.87182e-06	-30.9		83.147	-30.9
0.201513	-30.8		3462.23	-30.8		1.85899e-06	-30.8		82.9473	-30.8
0.200699	-30.7		3453.71	-30.7		1.84624e-06	-30.7		82.748	-30.7
0.199887	-30.6		3445.21	-30.6		1.83357e-06	-30.6		82.5493	-30.6
0.199078	-30.5		3436.73	-30.5		1.82098e-06	-30.5		82.3511	-30.5
0.198271	-30.4		3428.28	-30.4		1.80847e-06	-30.4		82.1533	-30.4
0.197466	-30.3		3419.84	-30.3		1.79604e-06	-30.3		81.9561	-30.3
0.196664	-30.2		3411.42	-30.2		1.78369e-06	-30.2		81.7594	-30.2
0.195864	-30.1		3403.03	-30.1		1.77141e-06	-30.1		81.5631	-30.1
0.195067	-30		3394.65	-30		1.75922e-06	-30		81.3674	-30
0.194271	-29.9		3386.3	-29.9		1.7471e-06	-29.9		81.1721	-29.9
0.193479	-29.8		3377.97	-29.8		1.73507e-06	-29.8		80.9774	-29.8
0.192688	-29.7		3369.66	-29.7		1.72311e-06	-29.7		80.7831	-29.7
0.1919	-29.6		3361.37	-29.6		1.71122e-06	-29.6		80.5893	-29.6
0.191114	-29.5		3353.1	-29.5		1.69941e-06	-29.5		80.396	-29.5
0.19033	-29.4		3344.85	-29.4		1.68768e-06	-29.4		80.2032	-29.4
0.189548	-29.3		3336.62	-29.3		1.67602e-06	-29.3		80.0109	-29.3
0.188769	-29.2		3328.41	-29.2		1.66444e-06	-29.2		79.8191	-29.2
0.187993	-29.1		3320.22	-29.1		1.65293e-06	-29.1		79.6277	-29.1
0.187218	-29		3312.05	-29		1.6415e-06	-29		79.4368	-29
0.186446	-28.9		3303.9	-28.9		1.63014e-06	-28.9		79.2465	-28.9
0.185676	-28.8		3295.78	-28.8		1.61885e-06	-28.8		79.0565	-28.8
0.184908	-28.7		3287.67	-28.7		1.60764e-06	-28.7		78.8671	-28.7
0.184143	-28.6		3279.58	-28.6		1.5965e-06	-28.6		78.6781	-28.6
0.18338	-28.5		3271.51	-28.5		1.58543e-06	-28.5		78.4897	-28.5
0.182619	-28.4		3263.47	-28.4		1.57443e-06	-28.4		78.3016	-28.4
0.181861	-28.3		3255.44	-28.3		1.5635e-06	-28.3		78.1141	-28.3
0.181105	-28.2		3247.43	-28.2		1.55264e-06	-28.2		77.927	-28.2
0.180351	-28.1		3239.45	-28.1		1.54186e-06	-28.1		77.7404	-28.1
0.179599	-28		3231.48	-28		1.53114e-06	-28		77.5543	-28
0.17885	-27.9		3223.53	-27.9		1.52049e-06	-27.9		77.3687	-27.9
0.178103	-27.8		3215.6	-27.8		1.50991e-06	-27.8		77.1835	-27.8
0.177358	-27.7		3207.7	-27.7		1.4994e-06	-27.7		76.9988	-27.7
0.176616	-27.6		3199.81	-27.6		1.48896e-06	-27.6		76.8145	-27.6
0.175875	-27.5		3191.94	-27.5		1.47859e-06	-27.5		76.6307	-27.5
0.175137	-27.4		3184.09	-27.4		1.46828e-06	-27.4		76.4474	-27.4
0.174401	-27.3		3176.26	-27.3		1.45804e-06	-27.3		76.2645	-27.3
0.173668	-27.2		3168.45	-27.2		1.44787e-06	-27.2		76.0821	-27.2
0.172937	-27.1		3160.66	-27.1		1.43776e-06	-27.1		75.9001	-27.1
0.172208	-27		3152.89	-27		1.42772e-06	-27		75.7186	-27
0.171481	-26.9		3145.14	-26.9		1.41775e-06	-26.9		75.5376	-26.9
0.170756	-26.8		3137.41	-26.8		1.40784e-06	-26.8		75.357	-26.8
0.170034	-26.7		3129.69	-26.7		1.398e-06	-26.7		75.1769	-26.7
0.169314	-26.6		3122	-26.6		1.38821e-06	-26.6		74.9972	-26.6
0.168596	-26.5		3114.32	-26.5		1.3785e-06	-26.5		74.818	-26.5
0.167881	-26.4		3106.67	-26.4		1.36885e-06	-26.4		74.6392	-26.4
0.167167	-26.3		3099.03	-26.3		1.35926e-06	-26.3		74.4609	-26.3
0.166456	-26.2		3091.41	-26.2		1.34973e-06	-26.2		74.283	-26.2
0.165747	-26.1		3083.81	-26.1		1.34026e-06	-26.1		74.1056	-26.1
0.165041	-26		3076.23	-26		1.33086e-06	-26		73.9286	-26
0.164336	-25.9		3068.67	-25.9		1.32152e-06	-25.9		73.7521	-25.9
0.163634	-25.8		3061.13	-25.8		1.31224e-06	-25.8		73.576	-25.8
0.162934	-25.7		3053.61	-25.7		1.30302e-06	-25.7		73.4003	-25.7
0.162236	-25.6		3046.1	-25.6		1.29387e-06	-25.6		73.2251	-25.6
0.16154	-25.5		3038.62	-25.5		1.28477e-06	-25.5		73.0504	-25.5
0.160847	-25.4		3031.15	-25.4		1.27573e-06	-25.4		72.8761	-25.4
0.160156	-25.3		3023.7	-25.3		1.26676e-06	-25.3		72.7022	-25.3
0.159467	-25.2		3016.27	-25.2		1.25784e-06	-25.2		72.5287	-25.2
0.15878	-25.1		3008.86	-25.1		1.24898e-06	-25.1		72.3557	-25.1
0.158095	-25		3001.46	-25		1.24018e-06	-25		72.1831	-25
0.157413	-24.9		2994.09	-24.9		1.23143e-06	-24.9		72.011	-24.9
0.156733	-24.8		2986.73	-24.8		1.22275e-06	-24.8		71.8393	-24.8
0.156055	-24.7		2979.39	-24.7		1.21412e-06	-24.7		71.668	-24.7
0.155379	-24.6		2972.07	-24.6		1.20555e-06	-24.6		71.4972	-24.6
0.154705	-24.5		2964.77	-24.5		1.19704e-06	-24.5		71.3267	-24.5
0.154033	-24.4		2957.49	-24.4		1.18858e-06	-24.4		71.1567	-24.4
0.153364	-24.3		2950.22	-24.3		1.18018e-06	-24.3		70.9872	-24.3
0.152697	-24.2		2942.97	-24.2		1.17184e-06	-24.2		70.818	-24.2
0.152032	-24.1		2935.74	-24.1		1.16355e-06	-24.1		70.6493	-24.1
0.151369	-24		2928.53	-24		1.15531e-06	-24		70.4811	-24
0.150708	-23.9		2921.34	-23.9		1.14713e-06	-23.9		70.3132	-23.9
0.150049	-23.8		2914.16	-23.8		1.13901e-06	-23.8		70.1458	-23.8
0.149393	-23.7		2907	-23.7		1.13093e-06	-23.7		69.9787	-23.7
0.148739	-23.6		2899.86	-23.6		1.12292e-06	-23.6		69.8121	-23.6
0.148086	-23.5		2892.74	-23.5		1.11495e-06	-23.5		69.646	-23.5
0.147436	-23.4		2885.64	-23.4		1.10704e-06	-23.4		69.4802	-23.4
0.146788	-23.3		2878.55	-23.3		1.09918e-06	-23.3		69.3149	-23.3
0.146143	-23.2		2871.48	-23.2		1.09138e-06	-23.2		69.1499	-23.2
0.145499	-23.1		2864.43	-23.1		1.08363e-06	-23.1		68.9854	-23.1
0.144858	-23		2857.4	-23		1.07592e-06	-23		68.8213	-23
0.144218	-22.9		2850.38	-22.9		1.06827e-06	-22.9		68.6576	-22.9
0.143581	-22.8		2843.38	-22.8		1.06068e-06	-22.8		68.4944	-22.8
0.142946	-22.7		2836.4	-22.7		1.05313e-06	-22.7		68.3315	-22.7
0.142313	-22.6		2829.43	-22.6		1.04563e-06	-22.6		68.169	-22.6
0.141682	-22.5		2822.49	-22.5		1.03818e-06	-22.5		68.007	-22.5
0.141053	-22.4		2815.56	-22.4		1.03079e-06	-22.4		67.8454	-22.4
0.140426	-22.3		2808.64	-22.3		1.02344e-06	-22.3		67.6841	-22.3
0.139802	-22.2		2801.75	-22.2		1.01614e-06	-22.2		67.5233	-22.2
0.139179	-22.1		2794.87	-22.1		1.00889e-06	-22.1		67.3629	-22.1
0.138559	-22		2788.01	-22		1.00169e-06	-22		67.2029	-22
0.13794	-21.9		2781.16	-21.9		9.94542e-07	-21.9		67.0432	-21.9
0.137324	-21.8		2774.34	-21.8		9.87438e-07	-21.8		66.884	-21.8
0.13671	-21.7		2767.53	-21.7		9.80383e-07	-21.7		66.7252	-21.7
0.136098	-21.6		2760.73	-21.6		9.73375e-07	-21.6		66.5668	-21.6
0.135488	-21.5		2753.96	-21.5		9.66415e-07	-21.5		66.4088	-21.5
0.13488	-21.4		2747.2	-21.4		9.59501e-07	-21.4		66.2512	-21.4
0.134274	-21.3		2740.46	-21.3		9.52635e-07	-21.3		66.094	-21.3
0.13367	-21.2		2733.73	-21.2		9.45814e-07	-21.2		65.9371	-21.2
0.133069	-21.1		2727.02	-21.1		9.3904e-07	-21.1		65.7807	-21.1
0.132469	-21		2720.33	-21		9.32312e-07	-21		65.6247	-21
0.131871	-20.9		2713.65	-20.9		9.25629e-07	-20.9		65.469	-20.9
0.131276	-20.8		2706.99	-20.8		9.18992e-07	-20.8		65.3138	-20.8
0.130682	-20.7		2700.35	-20.7		9.124e-07	-20.7		65.1589	-20.7
0.130091	-20.6		2693.72	-20.6		9.05852e-07	-20.6		65.0044	-20.6
0.129501	-20.5		2687.11	-20.5		8.99349e-07	-20.5		64.8503	-20.5
0.128914	-20.4		2680.52	-20.4		8.9289e-07	-20.4		64.6966	-20.4
0.128328	-20.3		2673.94	-20.3		8.86474e-07	-20.3		64.5433	-20.3
0.127745	-20.2		2667.38	-20.2		8.80103e-07	-20.2		64.3904	-20.2
0.127164	-20.1		2660.84	-20.1		8.73775e-07	-20.1		64.2379	-20.1
0.126584	-20		2654.31	-20		8.6749e-07	-20		64.0857	-20
0.126007	-19.9		2647.8	-19.9		8.61248e-07	-19.9		63.9339	-19.9
0.125432	-19.8		2641.31	-19.8		8.55048e-07	-19.8		63.7825	-19.8
0.124859	-19.7		2634.83	-19.7		8.4889e-07	-19.7		63.6315	-19.7
0.124287	-19.6		2628.36	-19.6		8.42775e-07	-19.6		63.4809	-19.6
0.123718	-19.5		2621.92	-19.5		8.36701e-07	-19.5		63.3306	-19.5
0.123151	-19.4		2615.49	-19.4		8.30669e-07	-19.4		63.1807	-19.4
0.122586	-19.3		2609.07	-19.3		8.24678e-07	-19.3		63.0312	-19.3
0.122022	-19.2		2602.67	-19.2		8.18729e-07	-19.2		62.8821	-19.2
0.121461	-19.1		2596.29	-19.1		8.12819e-07	-19.1		62.7334	-19.1
0.120902	-19		2589.92	-19		8.06951e-07	-19		62.585	-19
0.120344	-18.9		2583.57	-18.9		8.01122e-07	-18.9		62.437	-18.9
0.119789	-18.8		2577.23	-18.8		7.95333e-07	-18.8		62.2894	-18.8
0.119236	-18.7		2570.91	-18.7		7.89585e-07	-18.7		62.1421	-18.7
0.118684	-18.6		2564.61	-18.6		7.83875e-07	-18.6		61.9952	-18.6
0.118135	-18.5		2558.32	-18.5		7.78205e-07	-18.5		61.8487	-18.5
0.117588	-18.4		2552.05	-18.4		7.72574e-07	-18.4		61.7026	-18.4
0.117042	-18.3		2545.79	-18.3		7.66981e-07	-18.3		61.5568	-18.3
0.116499	-18.2		2539.55	-18.2		7.61427e-07	-18.2		61.4114	-18.2
0.115957	-18.1		2533.32	-18.1		7.55911e-07	-18.1		61.2663	-18.1
0.115417	-18		2527.11	-18		7.50433e-07	-18		61.1216	-18
0.11488	-17.9		2520.92	-17.9		7.44993e-07	-17.9		60.9773	-17.9
0.114344	-17.8		2514.74	-17.8		7.3959e-07	-17.8		60.8333	-17.8
0.11381	-17.7		2508.57	-17.7		7.34225e-07	-17.7		60.6897	-17.7
0.113278	-17.6		2502.42	-17.6		7.28897e-07	-17.6		60.5465	-17.6
0.112748	-17.5		2496.29	-17.5		7.23605e-07	-17.5		60.4036	-17.5
0.11222	-17.4		2490.17	-17.4		7.1835e-07	-17.4		60.2611	-17.4
0.111694	-17.3		2484.07	-17.3		7.13131e-07	-17.3		60.119	-17.3
0.11117	-17.2		2477.98	-17.2		7.07948e-07	-17.2		59.9772	-17.2
0.110648	-17.1		2471.91	-17.1		7.02802e-07	-17.1		59.8357	-17.1
0.110127	-17		2465.85	-17		6.9769e-07	-17		59.6946	-17
0.109609	-16.9		2459.81	-16.9		6.92615e-07	-16.9		59.5539	-16.9
0.109092	-16.8		2453.78	-16.8		6.87574e-07	-16.8		59.4135	-16.8
0.108578	-16.7		2447.77	-16.7		6.82568e-07	-16.7		59.2735	-16.7
0.108065	-16.6		2441.77	-16.6		6.77597e-07	-16.6		59.1338	-16.6
0.107554	-16.5		2435.79	-16.5		6.72661e-07	-16.5		58.9945	-16.5
0.107045	-16.4		2429.82	-16.4		6.67759e-07	-16.4		58.8555	-16.4
0.106538	-16.3		2423.86	-16.3		6.62891e-07	-16.3		58.7169	-16.3
0.106033	-16.2		2417.93	-16.2		6.58056e-07	-16.2		58.5786	-16.2
0.105529	-16.1		2412	-16.1		6.53256e-07	-16.1		58.4407	-16.1
0.105028	-16		2406.09	-16		6.48489e-07	-16		58.3031	-16
0.104528	-15.9		2400.2	-15.9		6.43754e-07	-15.9		58.1659	-15.9
0.10403	-15.8		2394.32	-15.8		6.39053e-07	-15.8		58.029	-15.8
0.103535	-15.7		2388.45	-15.7		6.34385e-07	-15.7		57.8924	-15.7
0.10304	-15.6		2382.6	-15.6		6.29749e-07	-15.6		57.7562	-15.6
0.102548	-15.5		2376.77	-15.5		6.25146e-07	-15.5		57.6204	-15.5
0.102058	-15.4		2370.95	-15.4		6.20574e-07	-15.4		57.4848	-15.4
0.101569	-15.3		2365.14	-15.3		6.16035e-07	-15.3		57.3497	-15.3
0.101083	-15.2		2359.35	-15.2		6.11527e-07	-15.2		57.2148	-15.2
0.100598	-15.1		2353.57	-15.1		6.07051e-07	-15.1		57.0803	-15.1
0.100115	-15		2347.81	-15		6.02606e-07	-15		56.9462	-15
0.0996337	-14.9		2342.06	-14.9		5.98192e-07	-14.9		56.8123	-14.9
0.0991544	-14.8		2336.32	-14.8		5.9381e-07	-14.8		56.6789	-14.8
0.0986768	-14.7		2330.6	-14.7		5.89457e-07	-14.7		56.5457	-14.7
0.0982011	-14.6		2324.9	-14.6		5.85136e-07	-14.6		56.4129	-14.6
0.0977272	-14.5		2319.2	-14.5		5.80844e-07	-14.5		56.2804	-14.5
0.0972551	-14.4		2313.52	-14.4		5.76583e-07	-14.4		56.1482	-14.4
0.0967848	-14.3		2307.86	-14.3		5.72352e-07	-14.3		56.0164	-14.3
0.0963163	-14.2		2302.21	-14.2		5.6815e-07	-14.2		55.8849	-14.2
0.0958495	-14.1		2296.58	-14.1		5.63978e-07	-14.1		55.7538	-14.1
0.0953846	-14		2290.95	-14		5.59835e-07	-14		55.623	-14
0.0949215	-13.9		2285.35	-13.9		5.55721e-07	-13.9		55.4925	-13.9
0.0944601	-13.8		2279.75	-13.8		5.51636e-07	-13.8		55.3623	-13.8
0.0940005	-13.7		2274.17	-13.7		5.4758e-07	-13.7		55.2324	-13.7
0.0935427	-13.6		2268.61	-13.6		5.43553e-07	-13.6		55.1029	-13.6
0.0930867	-13.5		2263.05	-13.5		5.39554e-07	-13.5		54.9737	-13.5
0.0926324	-13.4		2257.51	-13.4		5.35583e-07	-13.4		54.8449	-13.4
0.0921799	-13.3		2251.99	-13.3		5.3164e-07	-13.3		54.7163	-13.3
0.0917291	-13.2		2246.48	-13.2		5.27725e-07	-13.2		54.5881	-13.2
0.0912801	-13.1		2240.98	-13.1		5.23838e-07	-13.1		54.4602	-13.1
0.0908329	-13		2235.5	-13		5.19978e-07	-13		54.3326	-13
0.0903873	-12.9		2230.03	-12.9		5.16145e-07	-12.9		54.2054	-12.9
0.0899436	-12.8		2224.57	-12.8		5.12339e-07	-12.8		54.0784	-12.8
0.0895015	-12.7		2219.13	-12.7		5.0856e-07	-12.7		53.9518	-12.7
0.0890612	-12.6		2213.7	-12.6		5.04808e-07	-12.6		53.8255	-12.6
0.0886226	-12.5		2208.28	-12.5		5.01083e-07	-12.5		53.6996	-12.5
0.0881858	-12.4		2202.88	-12.4		4.97384e-07	-12.4		53.5739	-12.4
0.0877507	-12.3		2197.49	-12.3		4.93711e-07	-12.3		53.4485	-12.3
0.0873172	-12.2		2192.12	-12.2		4.90064e-07	-12.2		53.3235	-12.2
0.0868855	-12.1		2186.76	-12.1		4.86443e-07	-12.1		53.1988	-12.1
0.0864555	-12		2181.41	-12		4.82848e-07	-12		53.0744	-12
0.0860272	-11.9		2176.07	-11.9		4.79278e-07	-11.9		52.9503	-11.9
0.0856006	-11.8		2170.75	-11.8		4.75734e-07	-11.8		52.8265	-11.8
0.0851757	-11.7		2165.44	-11.7		4.72215e-07	-11.7		52.703	-11.7
0.0847525	-11.6		2160.15	-11.6		4.68721e-07	-11.6		52.5799	-11.6
0.084331	-11.5		2154.86	-11.5		4.65251e-07	-11.5		52.457	-11.5
0.0839111	-11.4		2149.59	-11.4		4.61807e-07	-11.4		52.3345	-11.4
0.0834929	-11.3		2144.34	-11.3		4.58386e-07	-11.3		52.2123	-11.3
0.0830764	-11.2		2139.09	-11.2		4.54991e-07	-11.2		52.0903	-11.2
0.0826616	-11.1		2133.86	-11.1		4.51619e-07	-11.1		51.9687	-11.1
0.0822484	-11		2128.65	-11		4.48271e-07	-11		51.8474	-11
0.0818369	-10.9		2123.44	-10.9		4.44948e-07	-10.9		51.7264	-10.9
0.0814271	-10.8		2118.25	-10.8		4.41648e-07	-10.8		51.6057	-10.8
0.0810189	-10.7		2113.07	-10.7		4.38371e-07	-10.7		51.4853	-10.7
0.0806124	-10.6		2107.91	-10.6		4.35118e-07	-10.6		51.3652	-10.6
0.0802075	-10.5		2102.75	-10.5		4.31888e-07	-10.5		51.2454	-10.5
0.0798042	-10.4		2097.61	-10.4		4.28682e-07	-10.4		51.1259	-10.4
0.0794026	-10.3		2092.49	-10.3		4.25498e-07	-10.3		51.0067	-10.3
0.0790026	-10.2		2087.37	-10.2		4.22337e-07	-10.2		50.8878	-10.2
0.0786042	-10.1		2082.27	-10.1		4.19199e-07	-10.1		50.7692	-10.1
0.0782075	-10		2077.18	-10		4.16083e-07	-10		50.6509	-10
0.0778123	-9.9		2072.11	-9.9		4.12989e-07	-9.9		50.5329	-9.9
0.0774188	-9.8		2067.04	-9.8		4.09917e-07	-9.8		50.4152	-9.8
0.0770269	-9.7		2061.99	-9.7		4.06868e-07	-9.7		50.2978	-9.7
0.0766366	-9.6		2056.95	-9.6		4.0384e-07	-9.6		50.1807	-9.6
0.0762479	-9.5		2051.93	-9.5		4.00835e-07	-9.5		50.0638	-9.5
0.0758608	-9.4		2046.91	-9.4		3.9785e-07	-9.4		49.9473	-9.4
0.0754753	-9.3		2041.91	-9.3		3.94887e-07	-9.3		49.8311	-9.3
0.0750914	-9.2		2036.93	-9.2		3.91946e-07	-9.2		49.7151	-9.2
0.0747091	-9.1		2031.95	-9.1		3.89025e-07	-9.1		49.5995	-9.1
0.0743283	-9		2026.99	-9		3.86126e-07	-9		49.4841	-9
0.0739491	-8.9		2022.03	-8.9		3.83247e-07	-8.9		49.369	-8.9
0.0735715	-8.8		2017.09	-8.8		3.8039e-07	-8.8		49.2543	-8.8
0.0731955	-8.7		2012.17	-8.7		3.77552e-07	-8.7		49.1398	-8.7
0.072821	-8.6		2007.25	-8.6		3.74735e-07	-8.6		49.0256	-8.6
0.0724481	-8.5		2002.35	-8.5		3.71939e-07	-8.5		48.9116	-8.5
0.0720768	-8.4		1997.46	-8.4		3.69162e-07	-8.4		48.798	-8.4
0.0717069	-8.3		1992.58	-8.3		3.66406e-07	-8.3		48.6847	-8.3
0.0713387	-8.2		1987.72	-8.2		3.63669e-07	-8.2		48.5716	-8.2
0.070972	-8.1		1982.86	-8.1		3.60953e-07	-8.1		48.4588	-8.1
0.0706068	-8		1978.02	-8		3.58255e-07	-8		48.3463	-8
0.0702431	-7.9		1973.19	-7.9		3.55578e-07	-7.9		48.2341	-7.9
0.069881	-7.8		1968.37	-7.8		3.52919e-07	-7.8		48.1222	-7.8
0.0695204	-7.7		1963.57	-7.7		3.5028e-07	-7.7		48.0105	-7.7
0.0691614	-7.6		1958.78	-7.6		3.4766e-07	-7.6		47.8992	-7.6
0.0688038	-7.5		1953.99	-7.5		3.45059e-07	-7.5		47.7881	-7.5
0.0684478	-7.4		1949.22	-7.4		3.42477e-07	-7.4		47.6773	-7.4
0.0680932	-7.3		1944.47	-7.3		3.39913e-07	-7.3		47.5667	-7.3
0.0677402	-7.2		1939.72	-7.2		3.37368e-07	-7.2		47.4565	-7.2
0.0673887	-7.1		1934.99	-7.1		3.34842e-07	-7.1		47.3465	-7.1
0.0670386	-7		1930.26	-7		3.32334e-07	-7		47.2368	-7
0.0666901	-6.9		1925.55	-6.9		3.29844e-07	-6.9		47.1274	-6.9
0.066343	-6.8		1920.85	-6.8		3.27372e-07	-6.8		47.0182	-6.8
0.0659974	-6.7		1916.16	-6.7		3.24918e-07	-6.7		46.9093	-6.7
0.0656533	-6.6		1911.49	-6.6		3.22481e-07	-6.6		46.8007	-6.6
0.0653107	-6.5		1906.82	-6.5		3.20063e-07	-6.5		46.6924	-6.5
0.0649696	-6.4		1902.17	-6.4		3.17662e-07	-6.4		46.5843	-6.4
0.0646299	-6.3		1897.53	-6.3		3.15278e-07	-6.3		46.4766	-6.3
0.0642916	-6.2		1892.9	-6.2		3.12912e-07	-6.2		46.369	-6.2
0.0639549	-6.1		1888.28	-6.1		3.10563e-07	-6.1		46.2618	-6.1
0.0636195	-6		1883.68	-6		3.08231e-07	-6		46.1548	-6
0.0632857	-5.9		1879.08	-5.9		3.05916e-07	-5.9		46.0481	-5.9
0.0629533	-5.8		1874.5	-5.8		3.03618e-07	-5.8		45.9417	-5.8
0.0626223	-5.7		1869.93	-5.7		3.01337e-07	-5.7		45.8355	-5.7
0.0622927	-5.6		1865.37	-5.6		2.99072e-07	-5.6		45.7296	-5.6
0.0619646	-5.5		1860.82	-5.5		2.96824e-07	-5.5		45.6239	-5.5
0.0616379	-5.4		1856.28	-5.4		2.94592e-07	-5.4		45.5186	-5.4
0.0613126	-5.3		1851.75	-5.3		2.92377e-07	-5.3		45.4135	-5.3
0.0609888	-5.2		1847.24	-5.2		2.90178e-07	-5.2		45.3086	-5.2
0.0606663	-5.1		1842.73	-5.1		2.87994e-07	-5.1		45.204	-5.1
0.0603453	-5		1838.24	-5		2.85827e-07	-5		45.0997	-5
0.0600257	-4.9		1833.76	-4.9		2.83676e-07	-4.9		44.9956	-4.9
0.0597075	-4.8		1829.28	-4.8		2.8154e-07	-4.8		44.8918	-4.8
0.0593907	-4.7		1824.82	-4.7		2.7942e-07	-4.7		44.7883	-4.7
0.0590752	-4.6		1820.38	-4.6		2.77315e-07	-4.6		44.685	-4.6
0.0587612	-4.5		1815.94	-4.5		2.75226e-07	-4.5		44.582	-4.5
0.0584485	-4.4		1811.51	-4.4		2.73152e-07	-4.4		44.4793	-4.4
0.0581373	-4.3		1807.1	-4.3		2.71093e-07	-4.3		44.3767	-4.3
0.0578274	-4.2		1802.69	-4.2		2.6905e-07	-4.2		44.2745	-4.2
0.0575188	-4.1		1798.3	-4.1		2.67021e-07	-4.1		44.1725	-4.1
0.0572117	-4		1793.92	-4		2.65007e-07	-4		44.0708	-4
0.0569059	-3.9		1789.54	-3.9		2.63008e-07	-3.9		43.9693	-3.9
0.0566014	-3.8		1785.18	-3.8		2.61024e-07	-3.8		43.8681	-3.8
0.0562984	-3.7		1780.83	-3.7		2.59054e-07	-3.7		43.7671	-3.7
0.0559966	-3.6		1776.49	-3.6		2.57099e-07	-3.6		43.6664	-3.6
0.0556962	-3.5		1772.16	-3.5		2.55158e-07	-3.5		43.566	-3.5
0.0553972	-3.4		1767.85	-3.4		2.53231e-07	-3.4		43.4657	-3.4
0.0550995	-3.3		1763.54	-3.3		2.51318e-07	-3.3		43.3658	-3.3
0.0548031	-3.2		1759.24	-3.2		2.4942e-07	-3.2		43.2661	-3.2
0.0545081	-3.1		1754.96	-3.1		2.47535e-07	-3.1		43.1666	-3.1
0.0542144	-3		1750.68	-3		2.45665e-07	-3		43.0674	-3
0.053922	-2.9		1746.42	-2.9		2.43808e-07	-2.9		42.9685	-2.9
0.0536309	-2.8		1742.16	-2.8		2.41965e-07	-2.8		42.8698	-2.8
0.0533411	-2.7		1737.92	-2.7		2.40135e-07	-2.7		42.7713	-2.7
0.0530527	-2.6		1733.69	-2.6		2.38319e-07	-2.6		42.6731	-2.6
0.0527655	-2.5		1729.47	-2.5		2.36516e-07	-2.5		42.5751	-2.5
0.0524797	-2.4		1725.25	-2.4		2.34726e-07	-2.4		42.4774	-2.4
0.0521951	-2.3		1721.05	-2.3		2.3295e-07	-2.3		42.3799	-2.3
0.0519119	-2.2		1716.86	-2.2		2.31187e-07	-2.2		42.2827	-2.2
0.0516299	-2.1		1712.68	-2.1		2.29437e-07	-2.1		42.1857	-2.1
0.0513492	-2		1708.51	-2		2.27699e-07	-2		42.089	-2
0.0510698	-1.9		1704.35	-1.9		2.25975e-07	-1.9		41.9925	-1.9
0.0507917	-1.8		1700.2	-1.8		2.24263e-07	-1.8		41.8962	-1.8
0.0505148	-1.7		1696.07	-1.7		2.22564e-07	-1.7		41.8002	-1.7
0.0502392	-1.6		1691.94	-1.6		2.20878e-07	-1.6		41.7044	-1.6
0.0499649	-1.5		1687.82	-1.5		2.19204e-07	-1.5		41.6089	-1.5
0.0496918	-1.4		1683.71	-1.4		2.17542e-07	-1.4		41.5136	-1.4
0.04942	-1.3		1679.61	-1.3		2.15893e-07	-1.3		41.4185	-1.3
0.0491494	-1.2		1675.52	-1.2		2.14256e-07	-1.2		41.3237	-1.2
0.0488801	-1.1		1671.45	-1.1		2.12631e-07	-1.1		41.2291	-1.1
0.048612	-1		1667.38	-1		2.11018e-07	-1		41.1348	-1
0.0483452	-0.9		1663.32	-0.9		2.09417e-07	-0.9		41.0407	-0.9
0.0480795	-0.8		1659.28	-0.8		2.07828e-07	-0.8		40.9468	-0.8
0.0478152	-0.7		1655.24	-0.7		2.0625e-07	-0.7		40.8532	-0.7
0.047552	-0.6		1651.21	-0.6		2.04685e-07	-0.6		40.7598	-0.6
0.0472901	-0.5		1647.19	-0.5		2.0313e-07	-0.5		40.6666	-0.5
0.0470294	-0.4		1643.19	-0.4		2.01588e-07	-0.4		40.5737	-0.4
0.0467699	-0.3		1639.19	-0.3		2.00057e-07	-0.3		40.481	-0.3
0.0465116	-0.2		1635.2	-0.2		1.98537e-07	-0.2		40.3885	-0.2
0.0462545	-0.1		1631.23	-0.1		1.97029e-07	-0.1		40.2963	-0.1
0.0459986	-1.09992e-11		1627.26	-1.09992e-11		1.95532e-07	-1.09992e-11		40.2043	-1.09992e-11
0.0457439	0.1		1623.3	0.1		1.94046e-07	0.1		40.1125	0.1
0.0454904	0.2		1619.35	0.2		1.9257e-07	0.2		40.021	0.2
0.0452381	0.3		1615.41	0.3		1.91106e-07	0.3		39.9297	0.3
0.044987	0.4		1611.49	0.4		1.89653e-07	0.4		39.8386	0.4
0.044737	0.5		1607.57	0.5		1.88211e-07	0.5		39.7477	0.5
0.0444882	0.6		1603.66	0.6		1.86779e-07	0.6		39.6571	0.6
0.0442406	0.7		1599.76	0.7		1.85358e-07	0.7		39.5667	0.7
0.0439942	0.8		1595.87	0.8		1.83948e-07	0.8		39.4765	0.8
0.0437489	0.9		1591.99	0.9		1.82548e-07	0.9		39.3866	0.9
0.0435048	1		1588.12	1		1.81159e-07	1		39.2969	1
0.0432619	1.1		1584.26	1.1		1.7978e-07	1.1		39.2074	1.1
0.0430201	1.2		1580.41	1.2		1.78411e-07	1.2		39.1181	1.2
0.0427795	1.3		1576.57	1.3		1.77052e-07	1.3		39.0291	1.3
0.0425399	1.4		1572.74	1.4		1.75704e-07	1.4		38.9402	1.4
0.0423016	1.5		1568.92	1.5		1.74365e-07	1.5		38.8517	1.5
0.0420644	1.6		1565.1	1.6		1.73037e-07	1.6		38.7633	1.6
0.0418283	1.7		1561.3	1.7		1.71719e-07	1.7		38.6751	1.7
0.0415933	1.8		1557.51	1.8		1.7041e-07	1.8		38.5872	1.8
0.0413594	1.9		1553.72	1.9		1.69111e-07	1.9		38.4995	1.9
0.0411267	2		1549.95	2		1.67822e-07	2		38.412	2
0.0408951	2.1		1546.18	2.1		1.66543e-07	2.1		38.3247	2.1
0.0406646	2.2		1542.43	2.2		1.65273e-07	2.2		38.2377	2.2
0.0404352	2.3		1538.68	2.3		1.64012e-07	2.3		38.1508	2.3
0.0402069	2.4		1534.94	2.4		1.62761e-07	2.4		38.0642	2.4
0.0399798	2.5		1531.22	2.5		1.6152e-07	2.5		37.9778	2.5
0.0397537	2.6		1527.5	2.6		1.60287e-07	2.6		37.8916	2.6
0.0395287	2.7		1523.79	2.7		1.59064e-07	2.7		37.8056	2.7
0.0393048	2.8		1520.09	2.8		1.5785e-07	2.8		37.7199	2.8
0.0390819	2.9		1516.4	2.9		1.56646e-07	2.9		37.6344	2.9
0.0388602	3		1512.71	3		1.5545e-07	3		37.549	3
0.0386395	3.1		1509.04	3.1		1.54263e-07	3.1		37.4639	3.1
0.0384199	3.2		1505.38	3.2		1.53085e-07	3.2		37.379	3.2
0.0382014	3.3		1501.72	3.3		1.51916e-07	3.3		37.2944	3.3
0.0379839	3.4		1498.08	3.4		1.50756e-07	3.4		37.2099	3.4
0.0377675	3.5		1494.44	3.5		1.49604e-07	3.5		37.1256	3.5
0.0375522	3.6		1490.81	3.6		1.48461e-07	3.6		37.0416	3.6
0.0373379	3.7		1487.2	3.7		1.47327e-07	3.7		36.9577	3.7
0.0371246	3.8		1483.59	3.8		1.46201e-07	3.8		36.8741	3.8
0.0369124	3.9		1479.99	3.9		1.45084e-07	3.9		36.7907	3.9
0.0367013	4		1476.39	4		1.43975e-07	4		36.7075	4
0.0364912	4.1		1472.81	4.1		1.42874e-07	4.1		36.6245	4.1
0.0362821	4.2		1469.24	4.2		1.41782e-07	4.2		36.5417	4.2
0.036074	4.3		1465.67	4.3		1.40698e-07	4.3		36.4591	4.3
0.035867	4.4		1462.12	4.4		1.39622e-07	4.4		36.3767	4.4
0.035661	4.5		1458.57	4.5		1.38554e-07	4.5		36.2946	4.5
0.035456	4.6		1455.03	4.6		1.37494e-07	4.6		36.2126	4.6
0.035252	4.7		1451.5	4.7		1.36442e-07	4.7		36.1309	4.7
0.035049	4.8		1447.98	4.8		1.35398e-07	4.8		36.0493	4.8
0.0348471	4.9		1444.47	4.9		1.34362e-07	4.9		35.968	4.9
0.0346461	5		1440.97	5		1.33334e-07	5		35.8868	5
0.0344461	5.1		1437.47	5.1		1.32313e-07	5.1		35.8059	5.1
0.0342472	5.2		1433.99	5.2		1.313e-07	5.2		35.7251	5.2
0.0340492	5.3		1430.51	5.3		1.30295e-07	5.3		35.6446	5.3
0.0338522	5.4		1427.04	5.4		1.29298e-07	5.4		35.5643	5.4
0.0336562	5.5		1423.58	5.5		1.28307e-07	5.5		35.4841	5.5
0.0334612	5.6		1420.13	5.6		1.27325e-07	5.6		35.4042	5.6
0.0332671	5.7		1416.69	5.7		1.2635e-07	5.7		35.3245	5.7
0.0330741	5.8		1413.25	5.8		1.25382e-07	5.8		35.245	5.8
0.032882	5.9		1409.83	5.9		1.24421e-07	5.9		35.1656	5.9
0.0326908	6		1406.41	6		1.23468e-07	6		35.0865	6
0.0325006	6.1		1403	6.1		1.22522e-07	6.1		35.0076	6.1
0.0323114	6.2		1399.6	6.2		1.21583e-07	6.2		34.9288	6.2
0.0321231	6.3		1396.21	6.3		1.20651e-07	6.3		34.8503	6.3
0.0319358	6.4		1392.83	6.4		1.19727e-07	6.4		34.7719	6.4
0.0317494	6.5		1389.45	6.5		1.18809e-07	6.5		34.6938	6.5
0.031564	6.6		1386.09	6.6		1.17898e-07	6.6		34.6159	6.6
0.0313795	6.7		1382.73	6.7		1.16994e-07	6.7		34.5381	6.7
0.031196	6.8		1379.38	6.8		1.16097e-07	6.8		34.4605	6.8
0.0310133	6.9		1376.04	6.9		1.15207e-07	6.9		34.3832	6.9
0.0308316	7		1372.7	7		1.14323e-07	7		34.306	7
0.0306509	7.1		1369.38	7.1		1.13446e-07	7.1		34.229	7.1
0.030471	7.2		1366.06	7.2		1.12576e-07	7.2		34.1523	7.2
0.0302921	7.3		1362.75	7.3		1.11713e-07	7.3		34.0757	7.3
0.030114	7.4		1359.45	7.4		1.10856e-07	7.4		33.9993	7.4
0.0299369	7.5		1356.16	7.5		1.10005e-07	7.5		33.9231	7.5
0.0297607	7.6		1352.88	7.6		1.09161e-07	7.6		33.847	7.6
0.0295854	7.7		1349.6	7.7		1.08323e-07	7.7		33.7712	7.7
0.029411	7.8		1346.33	7.8		1.07492e-07	7.8		33.6956	7.8
0.0292375	7.9		1343.08	7.9		1.06667e-07	7.9		33.6201	7.9
0.0290649	8		1339.82	8		1.05848e-07	8		33.5449	8
0.0288931	8.1		1336.58	8.1		1.05035e-07	8.1		33.4698	8.1
0.0287223	8.2		1333.35	8.2		1.04229e-07	8.2		33.3949	8.2
0.0285523	8.3		1330.12	8.3		1.03429e-07	8.3		33.3202	8.3
0.0283832	8.4		1326.9	8.4		1.02635e-07	8.4		33.2457	8.4
0.028215	8.5		1323.69	8.5		1.01846e-07	8.5		33.1714	8.5
0.0280476	8.6		1320.49	8.6		1.01064e-07	8.6		33.0973	8.6
0.0278812	8.7		1317.29	8.7		1.00288e-07	8.7		33.0233	8.7
0.0277155	8.8		1314.1	8.8		9.95178e-08	8.8		32.9496	8.8
0.0275508	8.9		1310.93	8.9		9.87533e-08	8.9		32.876	8.9
0.0273869	9		1307.75	9		9.79947e-08	9		32.8026	9
0.0272238	9.1		1304.59	9.1		9.72418e-08	9.1		32.7294	9.1
0.0270616	9.2		1301.43	9.2		9.64947e-08	9.2		32.6564	9.2
0.0269003	9.3		1298.29	9.3		9.57532e-08	9.3		32.5835	9.3
0.0267397	9.4		1295.15	9.4		9.50174e-08	9.4		32.5109	9.4
0.0265801	9.5		1292.02	9.5		9.42872e-08	9.5		32.4384	9.5
0.0264212	9.6		1288.89	9.6		9.35626e-08	9.6		32.3661	9.6
0.0262632	9.7		1285.77	9.7		9.28435e-08	9.7		32.294	9.7
0.026106	9.8		1282.67	9.8		9.21298e-08	9.8		32.222	9.8
0.0259497	9.9		1279.56	9.9		9.14216e-08	9.9		32.1503	9.9
0.0257941	10		1276.47	10		9.07188e-08	10		32.0787	10
0.0256394	10.1		1273.39	10.1		9.00214e-08	10.1		32.0073	10.1
0.0254855	10.2		1270.31	10.2		8.93292e-08	10.2		31.9361	10.2
0.0253324	10.3		1267.24	10.3		8.86424e-08	10.3		31.8651	10.3
0.0251801	10.4		1264.17	10.4		8.79608e-08	10.4		31.7942	10.4
0.0250286	10.5		1261.12	10.5		8.72844e-08	10.5		31.7235	10.5
0.0248779	10.6		1258.07	10.6		8.66131e-08	10.6		31.653	10.6
0.024728	10.7		1255.03	10.7		8.5947e-08	10.7		31.5827	10.7
0.024579	10.8		1252	10.8		8.5286e-08	10.8		31.5125	10.8
0.0244306	10.9		1248.97	10.9		8.463e-08	10.9		31.4426	10.9
0.0242831	11		1245.96	11		8.3979e-08	11		31.3728	11
0.0241364	11.1		1242.95	11.1		8.3333e-08	11.1		31.3031	11.1
0.0239904	11.2		1239.95	11.2		8.26919e-08	11.2		31.2337	11.2
0.0238453	11.3		1236.95	11.3		8.20557e-08	11.3		31.1644	11.3
0.0237009	11.4		1233.96	11.4		8.14244e-08	11.4		31.0953	11.4
0.0235572	11.5		1230.98	11.5		8.0798e-08	11.5		31.0264	11.5
0.0234144	11.6		1228.01	11.6		8.01763e-08	11.6		30.9576	11.6
0.0232723	11.7		1225.04	11.7		7.95593e-08	11.7		30.889	11.7
0.0231309	11.8		1222.09	11.8		7.89471e-08	11.8		30.8206	11.8
0.0229904	11.9		1219.14	11.9		7.83396e-08	11.9		30.7524	11.9
0.0228505	12		1216.19	12		7.77367e-08	12		30.6843	12
0.0227114	12.1		1213.26	12.1		7.71384e-08	12.1		30.6164	12.1
0.0225731	12.2		1210.33	12.2		7.65447e-08	12.2		30.5487	12.2
0.0224355	12.3		1207.41	12.3		7.59556e-08	12.3		30.4811	12.3
0.0222987	12.4		1204.49	12.4		7.53709e-08	12.4		30.4137	12.4
0.0221626	12.5		1201.59	12.5		7.47908e-08	12.5		30.3465	12.5
0.0220272	12.6		1198.69	12.6		7.4215e-08	12.6		30.2794	12.6
0.0218926	12.7		1195.79	12.7		7.36437e-08	12.7		30.2125	12.7
0.0217586	12.8		1192.91	12.8		7.30768e-08	12.8		30.1458	12.8
0.0216255	12.9		1190.03	12.9		7.25142e-08	12.9		30.0793	12.9
0.021493	13		1187.16	13		7.1956e-08	13		30.0129	13
0.0213612	13.1		1184.3	13.1		7.1402e-08	13.1		29.9466	13.1
0.0212302	13.2		1181.44	13.2		7.08522e-08	13.2		29.8806	13.2
0.0210999	13.3		1178.59	13.3		7.03067e-08	13.3		29.8147	13.3
0.0209703	13.4		1175.75	13.4		6.97653e-08	13.4		29.749	13.4
0.0208414	13.5		1172.91	13.5		6.92282e-08	13.5		29.6834	13.5
0.0207132	13.6		1170.08	13.6		6.86951e-08	13.6		29.618	13.6
0.0205856	13.7		1167.26	13.7		6.81661e-08	13.7		29.5528	13.7
0.0204588	13.8		1164.45	13.8		6.76412e-08	13.8		29.4877	13.8
0.0203327	13.9		1161.64	13.9		6.71203e-08	13.9		29.4228	13.9
0.0202073	14		1158.84	14		6.66034e-08	14		29.3581	14
0.0200826	14.1		1156.05	14.1		6.60905e-08	14.1		29.2935	14.1
0.0199585	14.2		1153.26	14.2		6.55815e-08	14.2		29.2291	14.2
0.0198351	14.3		1150.48	14.3		6.50764e-08	14.3		29.1648	14.3
0.0197124	14.4		1147.71	14.4		6.45752e-08	14.4		29.1007	14.4
0.0195904	14.5		1144.94	14.5		6.40779e-08	14.5		29.0368	14.5
0.0194691	14.6		1142.18	14.6		6.35844e-08	14.6		28.973	14.6
0.0193484	14.7		1139.43	14.7		6.30946e-08	14.7		28.9094	14.7
0.0192284	14.8		1136.69	14.8		6.26087e-08	14.8		28.8459	14.8
0.019109	14.9		1133.95	14.9		6.21264e-08	14.9		28.7826	14.9
0.0189903	15		1131.22	15		6.16479e-08	15		28.7195	15
0.0188723	15.1		1128.49	15.1		6.11731e-08	15.1		28.6565	15.1
0.0187549	15.2		1125.77	15.2		6.07019e-08	15.2		28.5937	15.2
0.0186382	15.3		1123.06	15.3		6.02343e-08	15.3		28.531	15.3
0.0185221	15.4		1120.36	15.4		5.97703e-08	15.4		28.4685	15.4
0.0184067	15.5		1117.66	15.5		5.93099e-08	15.5		28.4061	15.5
0.0182919	15.6		1114.97	15.6		5.88531e-08	15.6		28.3439	15.6
0.0181777	15.7		1112.29	15.7		5.83998e-08	15.7		28.2819	15.7
0.0180642	15.8		1109.61	15.8		5.79499e-08	15.8		28.22	15.8
0.0179513	15.9		1106.94	15.9		5.75035e-08	15.9		28.1583	15.9
0.0178391	16		1104.27	16		5.70606e-08	16		28.0967	16
0.0177274	16.1		1101.61	16.1		5.6621e-08	16.1		28.0353	16.1
0.0176164	16.2		1098.96	16.2		5.61849e-08	16.2		27.974	16.2
0.0175061	16.3		1096.32	16.3		5.57521e-08	16.3		27.9129	16.3
0.0173963	16.4		1093.68	16.4		5.53226e-08	16.4		27.8519	16.4
0.0172871	16.5		1091.05	16.5		5.48965e-08	16.5		27.7911	16.5
0.0171786	16.6		1088.42	16.6		5.44736e-08	16.6		27.7304	16.6
0.0170707	16.7		1085.81	16.7		5.4054e-08	16.7		27.6699	16.7
0.0169634	16.8		1083.19	16.8		5.36376e-08	16.8		27.6096	16.8
0.0168566	16.9		1080.59	16.9		5.32245e-08	16.9		27.5494	16.9
0.0167505	17		1077.99	17		5.28145e-08	17		27.4893	17
0.016645	17.1		1075.4	17.1		5.24077e-08	17.1		27.4294	17.1
0.0165401	17.2		1072.81	17.2		5.2004e-08	17.2		27.3697	17.2
0.0164358	17.3		1070.23	17.3		5.16034e-08	17.3		27.3101	17.3
0.016332	17.4		1067.66	17.4		5.1206e-08	17.4		27.2506	17.4
0.0162289	17.5		1065.09	17.5		5.08115e-08	17.5		27.1913	17.5
0.0161263	17.6		1062.53	17.6		5.04202e-08	17.6		27.1321	17.6
0.0160243	17.7		1059.98	17.7		5.00318e-08	17.7		27.0731	17.7
0.0159229	17.8		1057.43	17.8		4.96465e-08	17.8		27.0143	17.8
0.0158221	17.9		1054.89	17.9		4.92641e-08	17.9		26.9555	17.9
0.0157219	18		1052.35	18		4.88847e-08	18		26.897	18
0.0156222	18.1		1049.82	18.1		4.85082e-08	18.1		26.8386	18.1
0.0155231	18.2		1047.3	18.2		4.81346e-08	18.2		26.7803	18.2
0.0154245	18.3		1044.78	18.3		4.77639e-08	18.3		26.7221	18.3
0.0153265	18.4		1042.27	18.4		4.73961e-08	18.4		26.6642	18.4
0.0152291	18.5		1039.77	18.5		4.70311e-08	18.5		26.6063	18.5
0.0151322	18.6		1037.27	18.6		4.66689e-08	18.6		26.5486	18.6
0.0150359	18.7		1034.78	18.7		4.63095e-08	18.7		26.4911	18.7
0.0149402	18.8		1032.3	18.8		4.59529e-08	18.8		26.4337	18.8
0.0148449	18.9		1029.82	18.9		4.5599e-08	18.9		26.3764	18.9
0.0147503	19		1027.34	19		4.52479e-08	19		26.3193	19
0.0146562	19.1		1024.88	19.1		4.48995e-08	19.1		26.2623	19.1
0.0145626	19.2		1022.42	19.2		4.45538e-08	19.2		26.2055	19.2
0.0144695	19.3		1019.96	19.3		4.42108e-08	19.3		26.1488	19.3
0.014377	19.4		1017.51	19.4		4.38704e-08	19.4		26.0922	19.4
0.0142851	19.5		1015.07	19.5		4.35326e-08	19.5		26.0358	19.5
0.0141936	19.6		1012.64	19.6		4.31975e-08	19.6		25.9795	19.6
0.0141027	19.7		1010.21	19.7		4.28649e-08	19.7		25.9234	19.7
0.0140123	19.8		1007.78	19.8		4.2535e-08	19.8		25.8674	19.8
0.0139224	19.9		1005.36	19.9		4.22075e-08	19.9		25.8116	19.9
0.0138331	20		1002.95	20		4.18826e-08	20		25.7559	20
0.0137443	20.1		1000.54	20.1		4.15603e-08	20.1		25.7003	20.1
0.013656	20.2		998.144	20.2		4.12404e-08	20.2		25.6449	20.2
0.0135682	20.3		995.75	20.3		4.0923e-08	20.3		25.5896	20.3
0.0134809	20.4		993.362	20.4		4.0608e-08	20.4		25.5344	20.4
0.0133941	20.5		990.979	20.5		4.02955e-08	20.5		25.4794	20.5
0.0133078	20.6		988.603	20.6		3.99854e-08	20.6		25.4245	20.6
0.0132221	20.7		986.232	20.7		3.96777e-08	20.7		25.3698	20.7
0.0131368	20.8		983.868	20.8		3.93724e-08	20.8		25.3152	20.8
0.013052	20.9		981.509	20.9		3.90694e-08	20.9		25.2607	20.9
0.0129678	21		979.156	21		3.87688e-08	21		25.2064	21
0.012884	21.1		976.809	21.1		3.84705e-08	21.1		25.1522	21.1
0.0128007	21.2		974.468	21.2		3.81746e-08	21.2		25.0981	21.2
0.0127179	21.3		972.132	21.3		3.78809e-08	21.3		25.0442	21.3
0.0126356	21.4		969.803	21.4		3.75895e-08	21.4		24.9904	21.4
0.0125537	21.5		967.479	21.5		3.73003e-08	21.5		24.9367	21.5
0.0124724	21.6		965.161	21.6		3.70134e-08	21.6		24.8832	21.6
0.0123915	21.7		962.849	21.7		3.67287e-08	21.7		24.8298	21.7
0.0123111	21.8		960.542	21.8		3.64462e-08	21.8		24.7766	21.8
0.0122312	21.9		958.241	21.9		3.6166e-08	21.9		24.7234	21.9
0.0121517	22		955.946	22		3.58878e-08	22		24.6705	22
0.0120727	22.1		953.657	22.1		3.56119e-08	22.1		24.6176	22.1
0.0119942	22.2		951.373	22.2		3.5338e-08	22.2		24.5649	22.2
0.0119162	22.3		949.095	22.3		3.50663e-08	22.3		24.5123	22.3
0.0118386	22.4		946.823	22.4		3.47967e-08	22.4		24.4598	22.4
0.0117614	22.5		944.556	22.5		3.45292e-08	22.5		24.4075	22.5
0.0116848	22.6		942.295	22.6		3.42638e-08	22.6		24.3553	22.6
0.0116085	22.7		940.039	22.7		3.40004e-08	22.7		24.3032	22.7
0.0115328	22.8		937.789	22.8		3.37391e-08	22.8		24.2513	22.8
0.0114575	22.9		935.545	22.9		3.34798e-08	22.9		24.1995	22.9
0.0113826	23		933.306	23		3.32225e-08	23		24.1478	23
0.0113082	23.1		931.073	23.1		3.29672e-08	23.1		24.0962	23.1
0.0112342	23.2		928.845	23.2		3.27139e-08	23.2		24.0448	23.2
0.0111606	23.3		926.623	23.3		3.24625e-08	23.3		23.9935	23.3
0.0110875	23.4		924.407	23.4		3.22131e-08	23.4		23.9424	23.4
0.0110149	23.5		922.195	23.5		3.19656e-08	23.5		23.8913	23.5
0.0109426	23.6		919.99	23.6		3.17201e-08	23.6		23.8404	23.6
0.0108708	23.7		917.79	23.7		3.14764e-08	23.7		23.7896	23.7
0.0107995	23.8		915.595	23.8		3.12347e-08	23.8		23.739	23.8
0.0107285	23.9		913.406	23.9		3.09948e-08	23.9		23.6884	23.9
0.010658	24		911.222	24		3.07567e-08	24		23.638	24
0.0105879	24.1		909.044	24.1		3.05206e-08	24.1		23.5878	24.1
0.0105183	24.2		906.871	24.2		3.02862e-08	24.2		23.5376	24.2
0.010449	24.3		904.703	24.3		3.00537e-08	24.3		23.4876	24.3
0.0103802	24.4		902.541	24.4		2.9823e-08	24.4		23.4377	24.4
0.0103118	24.5		900.384	24.5		2.9594e-08	24.5		23.3879	24.5
0.0102437	24.6		898.233	24.6		2.93669e-08	24.6		23.3382	24.6
0.0101761	24.7		896.087	24.7		2.91415e-08	24.7		23.2887	24.7
0.010109	24.8		893.946	24.8		2.89179e-08	24.8		23.2393	24.8
0.0100422	24.9		891.81	24.9		2.8696e-08	24.9		23.19	24.9
0.00997579	25		889.68	25		2.84758e-08	25		23.1409	25
0.00990981	25.1		887.555	25.1		2.82573e-08	25.1		23.0918	25.1
0.00984423	25.2		885.436	25.2		2.80405e-08	25.2		23.0429	25.2
0.00977905	25.3		883.321	25.3		2.78254e-08	25.3		22.9941	25.3
0.00971427	25.4		881.212	25.4		2.7612e-08	25.4		22.9455	25.4
0.00964987	25.5		879.108	25.5		2.74002e-08	25.5		22.8969	25.5
0.00958587	25.6		877.01	25.6		2.71901e-08	25.6		22.8485	25.6
0.00952226	25.7		874.916	25.7		2.69816e-08	25.7		22.8002	25.7
0.00945903	25.8		872.828	25.8		2.67747e-08	25.8		22.752	25.8
0.00939619	25.9		870.745	25.9		2.65695e-08	25.9		22.7039	25.9
0.00933374	26		868.667	26		2.63658e-08	26		22.656	26
0.00927166	26.1		866.595	26.1		2.61637e-08	26.1		22.6081	26.1
0.00920996	26.2		864.527	26.2		2.59632e-08	26.2		22.5604	26.2
0.00914864	26.3		862.465	26.3		2.57642e-08	26.3		22.5128	26.3
0.0090877	26.4		860.407	26.4		2.55668e-08	26.4		22.4654	26.4
0.00902713	26.5		858.355	26.5		2.53709e-08	26.5		22.418	26.5
0.00896692	26.6		856.308	26.6		2.51765e-08	26.6		22.3708	26.6
0.00890709	26.7		854.266	26.7		2.49837e-08	26.7		22.3237	26.7
0.00884763	26.8		852.229	26.8		2.47923e-08	26.8		22.2767	26.8
0.00878853	26.9		850.197	26.9		2.46024e-08	26.9		22.2298	26.9
0.00872979	27		848.17	27		2.4414e-08	27		22.183	27
0.00867141	27.1		846.148	27.1		2.42271e-08	27.1		22.1364	27.1
0.0086134	27.2		844.132	27.2		2.40416e-08	27.2		22.0899	27.2
0.00855574	27.3		842.12	27.3		2.38576e-08	27.3		22.0435	27.3
0.00849843	27.4		840.113	27.4		2.3675e-08	27.4		21.9972	27.4
0.00844148	27.5		838.111	27.5		2.34938e-08	27.5		21.951	27.5
0.00838488	27.6		836.114	27.6		2.3314e-08	27.6		21.9049	27.6
0.00832863	27.7		834.122	27.7		2.31356e-08	27.7		21.859	27.7
0.00827273	27.8		832.135	27.8		2.29586e-08	27.8		21.8131	27.8
0.00821718	27.9		830.153	27.9		2.2783e-08	27.9		21.7674	27.9
0.00816196	28		828.176	28		2.26087e-08	28		21.7218	28
0.00810709	28.1		826.204	28.1		2.24358e-08	28.1		21.6763	28.1
0.00805256	28.2		824.237	28.2		2.22642e-08	28.2		21.6309	28.2
0.00799837	28.3		822.274	28.3		2.2094e-08	28.3		21.5856	28.3
0.00794452	28.4		820.317	28.4		2.19251e-08	28.4		21.5405	28.4
0.007891	28.5		818.364	28.5		2.17575e-08	28.5		21.4954	28.5
0.00783781	28.6		816.416	28.6		2.15912e-08	28.6		21.4505	28.6
0.00778495	28.7		814.473	28.7		2.14262e-08	28.7		21.4057	28.7
0.00773243	28.8		812.535	28.8		2.12625e-08	28.8		21.361	28.8
0.00768023	28.9		810.602	28.9		2.11e-08	28.9		21.3164	28.9
0.00762835	29		808.673	29		2.09388e-08	29		21.2719	29
0.0075768	29.1		806.749	29.1		2.07789e-08	29.1		21.2275	29.1
0.00752558	29.2		804.83	29.2		2.06202e-08	29.2		21.1833	29.2
0.00747467	29.3		802.916	29.3		2.04627e-08	29.3		21.1391	29.3
0.00742408	29.4		801.007	29.4		2.03065e-08	29.4		21.0951	29.4
0.00737381	29.5		799.102	29.5		2.01515e-08	29.5		21.0511	29.5
0.00732385	29.6		797.202	29.6		1.99977e-08	29.6		21.0073	29.6
0.0072742	29.7		795.307	29.7		1.9845e-08	29.7		20.9636	29.7
0.00722487	29.8		793.416	29.8		1.96936e-08	29.8		20.92	29.8
0.00717585	29.9		791.53	29.9		1.95433e-08	29.9		20.8765	29.9
0.00712713	30		789.649	30		1.93942e-08	30		20.8331	30
0.00707873	30.1		787.772	30.1		1.92463e-08	30.1		20.7898	30.1
0.00703062	30.2		785.9	30.2		1.90995e-08	30.2		20.7467	30.2
0.00698282	30.3		784.033	30.3		1.89539e-08	30.3		20.7036	30.3
0.00693532	30.4		782.171	30.4		1.88094e-08	30.4		20.6606	30.4
0.00688812	30.5		780.313	30.5		1.8666e-08	30.5		20.6178	30.5
0.00684122	30.6		778.459	30.6		1.85237e-08	30.6		20.575	30.6
0.00679461	30.7		776.61	30.7		1.83825e-08	30.7		20.5324	30.7
0.0067483	30.8		774.766	30.8		1.82425e-08	30.8		20.4899	30.8
0.00670229	30.9		772.927	30.9		1.81035e-08	30.9		20.4475	30.9
0.00665656	31		771.092	31		1.79656e-08	31		20.4051	31
0.00661112	31.1		769.261	31.1		1.78287e-08	31.1		20.3629	31.1
0.00656597	31.2		767.435	31.2		1.7693e-08	31.2		20.3208	31.2
0.00652111	31.3		765.614	31.3		1.75582e-08	31.3		20.2788	31.3
0.00647653	31.4		763.797	31.4		1.74246e-08	31.4		20.2369	31.4
0.00643224	31.5		761.984	31.5		1.72919e-08	31.5		20.1951	31.5
0.00638822	31.6		760.176	31.6		1.71603e-08	31.6		20.1534	31.6
0.00634449	31.7		758.373	31.7		1.70298e-08	31.7		20.1118	31.7
0.00630104	31.8		756.574	31.8		1.69002e-08	31.8		20.0704	31.8
0.00625786	31.9		754.78	31.9		1.67716e-08	31.9		20.029	31.9
0.00621495	32		752.99	32		1.66441e-08	32		19.9877	32
0.00617233	32.1		751.204	32.1		1.65175e-08	32.1		19.9465	32.1
0.00612997	32.2		749.423	32.2		1.63919e-08	32.2		19.9055	32.2
0.00608788	32.3		747.646	32.3		1.62673e-08	32.3		19.8645	32.3
0.00604607	32.4		745.874	32.4		1.61437e-08	32.4		19.8236	32.4
0.00600452	32.5		744.106	32.5		1.6021e-08	32.5		19.7829	32.5
0.00596323	32.6		742.342	32.6		1.58992e-08	32.6		19.7422	32.6
0.00592221	32.7		740.583	32.7		1.57785e-08	32.7		19.7016	32.7
0.00588146	32.8		738.828	32.8		1.56586e-08	32.8		19.6612	32.8
0.00584096	32.9		737.078	32.9		1.55397e-08	32.9		19.6208	32.9
0.00580073	33		735.332	33		1.54217e-08	33		19.5806	33
0.00576075	33.1		733.59	33.1		1.53046e-08	33.1		19.5404	33.1
0.00572103	33.2		731.853	33.2		1.51885e-08	33.2		19.5004	33.2
0.00568157	33.3		730.119	33.3		1.50732e-08	33.3		19.4604	33.3
0.00564236	33.4		728.391	33.4		1.49588e-08	33.4		19.4205	33.4
0.0056034	33.5		726.666	33.5		1.48453e-08	33.5		19.3808	33.5
0.00556469	33.6		724.946	33.6		1.47327e-08	33.6		19.3411	33.6
0.00552624	33.7		723.23	33.7		1.4621e-08	33.7		19.3016	33.7
0.00548803	33.8		721.518	33.8		1.45101e-08	33.8		19.2621	33.8
0.00545007	33.9		719.811	33.9		1.44001e-08	33.9		19.2227	33.9
0.00541235	34		718.107	34		1.4291e-08	34		19.1835	34
0.00537488	34.1		716.408	34.1		1.41827e-08	34.1		19.1443	34.1
0.00533765	34.2		714.714	34.2		1.40752e-08	34.2		19.1052	34.2
0.00530066	34.3		713.023	34.3		1.39686e-08	34.3		19.0662	34.3
0.00526391	34.4		711.336	34.4		1.38628e-08	34.4		19.0274	34.4
0.0052274	34.5		709.654	34.5		1.37578e-08	34.5		18.9886	34.5
0.00519113	34.6		707.976	34.6		1.36537e-08	34.6		18.9499	34.6
0.00515509	34.7		706.302	34.7		1.35503e-08	34.7		18.9113	34.7
0.00511928	34.8		704.633	34.8		1.34478e-08	34.8		18.8728	34.8
0.00508371	34.9		702.967	34.9		1.3346e-08	34.9		18.8344	34.9
0.00504837	35		701.306	35		1.32451e-08	35		18.7961	35
0.00501326	35.1		699.648	35.1		1.31449e-08	35.1		18.7579	35.1
0.00497838	35.2		697.995	35.2		1.30455e-08	35.2		18.7198	35.2
0.00494373	35.3		696.346	35.3		1.29468e-08	35.3		18.6818	35.3
0.0049093	35.4		694.701	35.4		1.2849e-08	35.4		18.6439	35.4
0.0048751	35.5		693.06	35.5		1.27518e-08	35.5		18.606	35.5
0.00484112	35.6		691.423	35.6		1.26555e-08	35.6		18.5683	35.6
0.00480736	35.7		689.79	35.7		1.25599e-08	35.7		18.5307	35.7
0.00477382	35.8		688.161	35.8		1.2465e-08	35.8		18.4931	35.8
0.00474051	35.9		686.537	35.9		1.23709e-08	35.9		18.4557	35.9
0.00470741	36		684.916	36		1.22775e-08	36		18.4183	36
0.00467452	36.1		683.299	36.1		1.21848e-08	36.1		18.381	36.1
0.00464186	36.2		681.687	36.2		1.20928e-08	36.2		18.3439	36.2
0.00460941	36.3		680.078	36.3		1.20016e-08	36.3		18.3068	36.3
0.00457717	36.4		678.473	36.4		1.19111e-08	36.4		18.2698	36.4
0.00454514	36.5		676.873	36.5		1.18212e-08	36.5		18.2329	36.5
0.00451332	36.6		675.276	36.6		1.17321e-08	36.6		18.1961	36.6
0.00448171	36.7		673.683	36.7		1.16436e-08	36.7		18.1594	36.7
0.00445031	36.8		672.094	36.8		1.15559e-08	36.8		18.1228	36.8
0.00441912	36.9		670.509	36.9		1.14688e-08	36.9		18.0862	36.9
0.00438813	37		668.928	37		1.13824e-08	37		18.0498	37
0.00435735	37.1		667.351	37.1		1.12966e-08	37.1		18.0134	37.1
0.00432677	37.2		665.778	37.2		1.12115e-08	37.2		17.9772	37.2
0.00429639	37.3		664.209	37.3		1.11271e-08	37.3		17.941	37.3
0.00426621	37.4		662.644	37.4		1.10434e-08	37.4		17.9049	37.4
0.00423624	37.5		661.082	37.5		1.09602e-08	37.5		17.8689	37.5
0.00420646	37.6		659.525	37.6		1.08778e-08	37.6		17.833	37.6
0.00417687	37.7		657.971	37.7		1.07959e-08	37.7		17.7972	37.7
0.00414749	37.8		656.421	37.8		1.07147e-08	37.8		17.7615	37.8
0.0041183	37.9		654.875	37.9		1.06342e-08	37.9		17.7259	37.9
0.0040893	38		653.333	38		1.05542e-08	38		17.6903	38
0.00406049	38.1		651.795	38.1		1.04749e-08	38.1		17.6549	38.1
0.00403188	38.2		650.26	38.2		1.03962e-08	38.2		17.6195	38.2
0.00400345	38.3		648.729	38.3		1.03181e-08	38.3		17.5842	38.3
0.00397522	38.4		647.203	38.4		1.02406e-08	38.4		17.549	38.4
0.00394717	38.5		645.679	38.5		1.01637e-08	38.5		17.5139	38.5
0.00391931	38.6		644.16	38.6		1.00874e-08	38.6		17.4789	38.6
0.00389163	38.7		642.644	38.7		1.00117e-08	38.7		17.444	38.7
0.00386414	38.8		641.133	38.8		9.93653e-09	38.8		17.4092	38.8
0.00383683	38.9		639.625	38.9		9.86198e-09	38.9		17.3744	38.9
0.00380971	39		638.12	39		9.78801e-09	39		17.3397	39
0.00378276	39.1		636.62	39.1		9.71462e-09	39.1		17.3051	39.1
0.003756	39.2		635.123	39.2		9.64178e-09	39.2		17.2706	39.2
0.00372941	39.3		633.63	39.3		9.56952e-09	39.3		17.2362	39.3
0.003703	39.4		632.14	39.4		9.49781e-09	39.4		17.2019	39.4
0.00367677	39.5		630.654	39.5		9.42665e-09	39.5		17.1677	39.5
0.00365071	39.6		629.172	39.6		9.35605e-09	39.6		17.1335	39.6
0.00362483	39.7		627.694	39.7		9.28599e-09	39.7		17.0994	39.7
0.00359912	39.8		626.219	39.8		9.21648e-09	39.8		17.0654	39.8
0.00357359	39.9		624.748	39.9		9.1475e-09	39.9		17.0315	39.9
0.00354822	40		623.28	40		9.07905e-09	40		16.9977	40
0.00352303	40.1		621.817	40.1		9.01113e-09	40.1		16.964	40.1
0.00349801	40.2		620.356	40.2		8.94374e-09	40.2		16.9303	40.2
0.00347315	40.3		618.9	40.3		8.87687e-09	40.3		16.8968	40.3
0.00344846	40.4		617.447	40.4		8.81051e-09	40.4		16.8633	40.4
0.00342394	40.5		615.998	40.5		8.74467e-09	40.5		16.8299	40.5
0.00339958	40.6		614.552	40.6		8.67934e-09	40.6		16.7966	40.6
0.00337538	40.7		613.11	40.7		8.61451e-09	40.7		16.7633	40.7
0.00335135	40.8		611.671	40.8		8.55018e-09	40.8		16.7302	40.8
0.00332748	40.9		610.236	40.9		8.48635e-09	40.9		16.6971	40.9
0.00330378	41		608.805	41		8.42301e-09	41		16.6641	41
0.00328023	41.1		607.377	41.1		8.36016e-09	41.1		16.6312	41.1
0.00325684	41.2		605.952	41.2		8.29779e-09	41.2		16.5984	41.2
0.00323361	41.3		604.532	41.3		8.23591e-09	41.3		16.5656	41.3
0.00321054	41.4		603.114	41.4		8.1745e-09	41.4		16.533	41.4
0.00318762	41.5		601.7	41.5		8.11357e-09	41.5		16.5004	41.5
0.00316486	41.6		600.29	41.6		8.05311e-09	41.6		16.4679	41.6
0.00314225	41.7		598.883	41.7		7.99311e-09	41.7		16.4355	41.7
0.00311979	41.8		597.48	41.8		7.93358e-09	41.8		16.4032	41.8
0.00309749	41.9		596.08	41.9		7.87451e-09	41.9		16.3709	41.9
0.00307534	42		594.684	42		7.81589e-09	42		16.3387	42
0.00305334	42.1		593.291	42.1		7.75772e-09	42.1		16.3066	42.1
0.00303149	42.2		591.901	42.2		7.7e-09	42.2		16.2746	42.2
0.00300979	42.3		590.515	42.3		7.64273e-09	42.3		16.2427	42.3
0.00298823	42.4		589.133	42.4		7.5859e-09	42.4		16.2108	42.4
0.00296682	42.5		587.754	42.5		7.5295e-09	42.5		16.179	42.5
0.00294556	42.6		586.378	42.6		7.47354e-09	42.6		16.1473	42.6
0.00292444	42.7		585.006	42.7		7.41802e-09	42.7		16.1157	42.7
0.00290347	42.8		583.637	42.8		7.36292e-09	42.8		16.0841	42.8
0.00288264	42.9		582.271	42.9		7.30824e-09	42.9		16.0527	42.9
0.00286195	43		580.909	43		7.25399e-09	43		16.0213	43
0.0028414	43.1		579.55	43.1		7.20015e-09	43.1		15.99	43.1
0.00282099	43.2		578.195	43.2		7.14673e-09	43.2		15.9587	43.2
0.00280073	43.3		576.843	43.3		7.09372e-09	43.3		15.9276	43.3
0.0027806	43.4		575.494	43.4		7.04111e-09	43.4		15.8965	43.4
0.00276061	43.5		574.149	43.5		6.98892e-09	43.5		15.8655	43.5
0.00274075	43.6		572.807	43.6		6.93712e-09	43.6		15.8346	43.6
0.00272103	43.7		571.468	43.7		6.88572e-09	43.7		15.8037	43.7
0.00270145	43.8		570.133	43.8		6.83472e-09	43.8		15.773	43.8
0.002682	43.9		568.801	43.9		6.78411e-09	43.9		15.7423	43.9
0.00266269	44		567.472	44		6.73389e-09	44		15.7117	44
0.0026435	44.1		566.147	44.1		6.68405e-09	44.1		15.6811	44.1
0.00262445	44.2		564.825	44.2		6.6346e-09	44.2		15.6506	44.2
0.00260553	44.3		563.506	44.3		6.58553e-09	44.3		15.6202	44.3
0.00258674	44.4		562.19	44.4		6.53684e-09	44.4		15.5899	44.4
0.00256808	44.5		560.878	44.5		6.48852e-09	44.5		15.5597	44.5
0.00254955	44.6		559.569	44.6		6.44057e-09	44.6		15.5295	44.6
0.00253114	44.7		558.263	44.7		6.39299e-09	44.7		15.4994	44.7
0.00251286	44.8		556.96	44.8		6.34578e-09	44.8		15.4694	44.8
0.00249471	44.9		555.661	44.9		6.29893e-09	44.9		15.4395	44.9
0.00247668	45		554.365	45		6.25243e-09	45		15.4096	45
0.00245878	45.1		553.072	45.1		6.2063e-09	45.1		15.3798	45.1
0.002441	45.2		551.782	45.2		6.16052e-09	45.2		15.3501	45.2
0.00242334	45.3		550.495	45.3		6.11509e-09	45.3		15.3204	45.3
0.00240581	45.4		549.212	45.4		6.07001e-09	45.4		15.2909	45.4
0.0023884	45.5		547.932	45.5		6.02528e-09	45.5		15.2614	45.5
0.0023711	45.6		546.655	45.6		5.98088e-09	45.6		15.2319	45.6
0.00235393	45.7		545.381	45.7		5.93683e-09	45.7		15.2026	45.7
0.00233688	45.8		544.11	45.8		5.89312e-09	45.8		15.1733	45.8
0.00231994	45.9		542.843	45.9		5.84974e-09	45.9		15.1441	45.9
0.00230312	46		541.578	46		5.8067e-09	46		15.115	46
0.00228642	46.1		540.317	46.1		5.76399e-09	46.1		15.0859	46.1
0.00226983	46.2		539.059	46.2		5.7216e-09	46.2		15.0569	46.2
0.00225336	46.3		537.804	46.3		5.67954e-09	46.3		15.028	46.3
0.002237	46.4		536.552	46.4		5.6378e-09	46.4		14.9991	46.4
0.00222076	46.5		535.303	46.5		5.59638e-09	46.5		14.9704	46.5
0.00220463	46.6		534.058	46.6		5.55528e-09	46.6		14.9417	46.6
0.00218861	46.7		532.815	46.7		5.51449e-09	46.7		14.913	46.7
0.0021727	46.8		531.575	46.8		5.47401e-09	46.8		14.8845	46.8
0.00215691	46.9		530.339	46.9		5.43385e-09	46.9		14.856	46.9
0.00214122	47		529.106	47		5.39399e-09	47		14.8275	47
0.00212565	47.1		527.875	47.1		5.35444e-09	47.1		14.7992	47.1
0.00211018	47.2		526.648	47.2		5.31519e-09	47.2		14.7709	47.2
0.00209482	47.3		525.424	47.3		5.27624e-09	47.3		14.7427	47.3
0.00207956	47.4		524.202	47.4		5.23759e-09	47.4		14.7145	47.4
0.00206442	47.5		522.984	47.5		5.19923e-09	47.5		14.6865	47.5
0.00204938	47.6		521.769	47.6		5.16117e-09	47.6		14.6585	47.6
0.00203444	47.7		520.557	47.7		5.1234e-09	47.7		14.6305	47.7
0.00201961	47.8		519.348	47.8		5.08592e-09	47.8		14.6027	47.8
0.00200488	47.9		518.141	47.9		5.04872e-09	47.9		14.5749	47.9
0.00199026	48		516.938	48		5.01181e-09	48		14.5472	48
0.00197574	48.1		515.738	48.1		4.97518e-09	48.1		14.5195	48.1
0.00196131	48.2		514.541	48.2		4.93883e-09	48.2		14.4919	48.2
0.001947	48.3		513.347	48.3		4.90276e-09	48.3		14.4644	48.3
0.00193278	48.4		512.155	48.4		4.86696e-09	48.4		14.4369	48.4
0.00191866	48.5		510.967	48.5		4.83144e-09	48.5		14.4095	48.5
0.00190464	48.6		509.781	48.6		4.79619e-09	48.6		14.3822	48.6
0.00189071	48.7		508.599	48.7		4.7612e-09	48.7		14.355	48.7
0.00187689	48.8		507.419	48.8		4.72649e-09	48.8		14.3278	48.8
0.00186316	48.9		506.243	48.9		4.69204e-09	48.9		14.3007	48.9
0.00184953	49		505.069	49		4.65785e-09	49		14.2736	49
0.001836	49.1		503.898	49.1		4.62392e-09	49.1		14.2466	49.1
0.00182256	49.2		502.73	49.2		4.59025e-09	49.2		14.2197	49.2
0.00180921	49.3		501.565	49.3		4.55684e-09	49.3		14.1929	49.3
0.00179596	49.4		500.403	49.4		4.52369e-09	49.4		14.1661	49.4
0.00178281	49.5		499.244	49.5		4.49078e-09	49.5		14.1394	49.5
0.00176974	49.6		498.088	49.6		4.45813e-09	49.6		14.1127	49.6
0.00175677	49.7		496.934	49.7		4.42572e-09	49.7		14.0861	49.7
0.00174389	49.8		495.784	49.8		4.39357e-09	49.8		14.0596	49.8
0.0017311	49.9		494.636	49.9		4.36165e-09	49.9		14.0332	49.9
0.0017184	50		493.491	50		4.32998e-09	50		14.0068	50
0.00170579	50.1		492.349	50.1		4.29856e-09	50.1		13.9805	50.1
0.00169327	50.2		491.209	50.2		4.26737e-09	50.2		13.9542	50.2
0.00168083	50.3		490.073	50.3		4.23641e-09	50.3		13.928	50.3
0.00166849	50.4		488.939	50.4		4.2057e-09	50.4		13.9019	50.4
0.00165623	50.5		487.808	50.5		4.17522e-09	50.5		13.8758	50.5
0.00164406	50.6		486.68	50.6		4.14497e-09	50.6		13.8498	50.6
0.00163198	50.7		485.555	50.7		4.11494e-09	50.7		13.8239	50.7
0.00161998	50.8		484.433	50.8		4.08515e-09	50.8		13.798	50.8
0.00160807	50.9		483.313	50.9		4.05559e-09	50.9		13.7722	50.9
0.00159624	51		482.196	51		4.02625e-09	51		13.7465	51
0.00158449	51.1		481.082	51.1		3.99713e-09	51.1		13.7208	51.1
0.00157283	51.2		479.971	51.2		3.96823e-09	51.2		13.6952	51.2
0.00156125	51.3		478.862	51.3		3.93955e-09	51.3		13.6696	51.3
0.00154976	51.4		477.756	51.4		3.91109e-09	51.4		13.6441	51.4
0.00153834	51.5		476.653	51.5		3.88285e-09	51.5		13.6187	51.5
0.00152701	51.6		475.553	51.6		3.85482e-09	51.6		13.5934	51.6
0.00151575	51.7		474.455	51.7		3.827e-09	51.7		13.5681	51.7
0.00150458	51.8		473.36	51.8		3.7994e-09	51.8		13.5428	51.8
0.00149349	51.9		472.268	51.9		3.772e-09	51.9		13.5176	51.9
0.00148247	52		471.178	52		3.74481e-09	52		13.4925	52
0.00147154	52.1		470.091	52.1		3.71783e-09	52.1		13.4675	52.1
0.00146068	52.2		469.007	52.2		3.69105e-09	52.2		13.4425	52.2
0.0014499	52.3		467.926	52.3		3.66448e-09	52.3		13.4176	52.3
0.00143919	52.4		466.847	52.4		3.63811e-09	52.4		13.3927	52.4
0.00142857	52.5		465.771	52.5		3.61193e-09	52.5		13.3679	52.5
0.00141802	52.6		464.697	52.6		3.58596e-09	52.6		13.3431	52.6
0.00140754	52.7		463.626	52.7		3.56018e-09	52.7		13.3185	52.7
0.00139714	52.8		462.558	52.8		3.5346e-09	52.8		13.2938	52.8
0.00138681	52.9		461.493	52.9		3.50921e-09	52.9		13.2693	52.9
0.00137656	53		460.43	53		3.48401e-09	53		13.2448	53
0.00136638	53.1		459.37	53.1		3.459e-09	53.1		13.2203	53.1
0.00135627	53.2		458.312	53.2		3.43418e-09	53.2		13.196	53.2
0.00134624	53.3		457.257	53.3		3.40956e-09	53.3		13.1716	53.3
0.00133628	53.4		456.205	53.4		3.38511e-09	53.4		13.1474	53.4
0.00132638	53.5		455.155	53.5		3.36085e-09	53.5		13.1232	53.5
0.00131656	53.6		454.108	53.6		3.33678e-09	53.6		13.099	53.6
0.00130681	53.7		453.063	53.7		3.31288e-09	53.7		13.075	53.7
0.00129713	53.8		452.021	53.8		3.28917e-09	53.8		13.0509	53.8
0.00128752	53.9		450.982	53.9		3.26564e-09	53.9		13.027	53.9
0.00127798	54		449.945	54		3.24228e-09	54		13.0031	54
0.00126851	54.1		448.911	54.1		3.2191e-09	54.1		12.9792	54.1
0.00125911	54.2		447.879	54.2		3.1961e-09	54.2		12.9554	54.2
0.00124977	54.3		446.85	54.3		3.17326e-09	54.3		12.9317	54.3
0.0012405	54.4		445.823	54.4		3.15061e-09	54.4		12.9081	54.4
0.00123129	54.5		444.799	54.5		3.12812e-09	54.5		12.8844	54.5
0.00122216	54.6		443.778	54.6		3.1058e-09	54.6		12.8609	54.6
0.00121309	54.7		442.759	54.7		3.08365e-09	54.7		12.8374	54.7
0.00120408	54.8		441.742	54.8		3.06166e-09	54.8		12.814	54.8
0.00119514	54.9		440.728	54.9		3.03985e-09	54.9		12.7906	54.9
0.00118626	55		439.717	55		3.01819e-09	55		12.7673	55
0.00117745	55.1		438.708	55.1		2.9967e-09	55.1		12.744	55.1
0.0011687	55.2		437.701	55.2		2.97538e-09	55.2		12.7208	55.2
0.00116001	55.3		436.697	55.3		2.95421e-09	55.3		12.6977	55.3
0.00115139	55.4		435.696	55.4		2.9332e-09	55.4		12.6746	55.4
0.00114283	55.5		434.697	55.5		2.91235e-09	55.5		12.6515	55.5
0.00113433	55.6		433.7	55.6		2.89165e-09	55.6		12.6286	55.6
0.00112589	55.7		432.706	55.7		2.87112e-09	55.7		12.6056	55.7
0.00111752	55.8		431.715	55.8		2.85073e-09	55.8		12.5828	55.8
0.0011092	55.9		430.726	55.9		2.8305e-09	55.9		12.56	55.9
0.00110094	56		429.739	56		2.81042e-09	56		12.5372	56
0.00109275	56.1		428.755	56.1		2.7905e-09	56.1		12.5145	56.1
0.00108461	56.2		427.773	56.2		2.77072e-09	56.2		12.4919	56.2
0.00107653	56.3		426.793	56.3		2.75109e-09	56.3		12.4693	56.3
0.00106851	56.4		425.816	56.4		2.73161e-09	56.4		12.4468	56.4
0.00106055	56.5		424.842	56.5		2.71227e-09	56.5		12.4243	56.5
0.00105265	56.6		423.87	56.6		2.69308e-09	56.6		12.4019	56.6
0.0010448	56.7		422.9	56.7		2.67403e-09	56.7		12.3795	56.7
0.00103701	56.8		421.933	56.8		2.65513e-09	56.8		12.3572	56.8
0.00102928	56.9		420.968	56.9		2.63637e-09	56.9		12.335	56.9
0.0010216	57		420.005	57		2.61775e-09	57		12.3128	57
0.00101398	57.1		419.045	57.1		2.59927e-09	57.1		12.2906	57.1
0.00100642	57.2		418.087	57.2		2.58092e-09	57.2		12.2685	57.2
0.000998906	57.3		417.132	57.3		2.56272e-09	57.3		12.2465	57.3
0.00099145	57.4		416.179	57.4		2.54465e-09	57.4		12.2245	57.4
0.000984049	57.5		415.228	57.5		2.52671e-09	57.5		12.2026	57.5
0.000976701	57.6		414.28	57.6		2.50891e-09	57.6		12.1807	57.6
0.000969406	57.7		413.334	57.7		2.49125e-09	57.7		12.1589	57.7
0.000962165	57.8		412.39	57.8		2.47371e-09	57.8		12.1371	57.8
0.000954976	57.9		411.449	57.9		2.45631e-09	57.9		12.1154	57.9
0.00094784	58		410.51	58		2.43903e-09	58		12.0938	58
0.000940756	58.1		409.573	58.1		2.42189e-09	58.1		12.0722	58.1
0.000933724	58.2		408.639	58.2		2.40487e-09	58.2		12.0506	58.2
0.000926742	58.3		407.707	58.3		2.38798e-09	58.3		12.0291	58.3
0.000919812	58.4		406.777	58.4		2.37122e-09	58.4		12.0077	58.4
0.000912932	58.5		405.85	58.5		2.35458e-09	58.5		11.9863	58.5
0.000906103	58.6		404.924	58.6		2.33807e-09	58.6		11.965	58.6
0.000899323	58.7		404.002	58.7		2.32168e-09	58.7		11.9437	58.7
0.000892593	58.8		403.081	58.8		2.30541e-09	58.8		11.9224	58.8
0.000885912	58.9		402.163	58.9		2.28926e-09	58.9		11.9012	58.9
0.00087928	59		401.247	59		2.27324e-09	59		11.8801	59
0.000872696	59.1		400.333	59.1		2.25733e-09	59.1		11.859	59.1
0.000866161	59.2		399.422	59.2		2.24154e-09	59.2		11.838	59.2
0.000859673	59.3		398.512	59.3		2.22587e-09	59.3		11.817	59.3
0.000853233	59.4		397.605	59.4		2.21032e-09	59.4		11.7961	59.4
0.00084684	59.5		396.701	59.5		2.19488e-09	59.5		11.7752	59.5
0.000840494	59.6		395.798	59.6		2.17955e-09	59.6		11.7544	59.6
0.000834194	59.7		394.898	59.7		2.16435e-09	59.7		11.7337	59.7
0.000827941	59.8		394	59.8		2.14925e-09	59.8		11.7129	59.8
0.000821733	59.9		393.104	59.9		2.13427e-09	59.9		11.6923	59.9
0.000815571	60		392.21	60		2.11939e-09	60		11.6717	60
0.000809454	60.1		391.319	60.1		2.10463e-09	60.1		11.6511	60.1
0.000803382	60.2		390.43	60.2		2.08998e-09	60.2		11.6306	60.2
0.000797355	60.3		389.543	60.3		2.07544e-09	60.3		11.6101	60.3
0.000791372	60.4		388.658	60.4		2.061e-09	60.4		11.5897	60.4
0.000785432	60.5		387.775	60.5		2.04667e-09	60.5		11.5693	60.5
0.000779537	60.6		386.895	60.6		2.03245e-09	60.6		11.549	60.6
0.000773685	60.7		386.017	60.7		2.01833e-09	60.7		11.5288	60.7
0.000767875	60.8		385.141	60.8		2.00432e-09	60.8		11.5085	60.8
0.000762109	60.9		384.267	60.9		1.99041e-09	60.9		11.4884	60.9
0.000756385	61		383.395	61		1.97661e-09	61		11.4683	61
0.000750703	61.1		382.525	61.1		1.96291e-09	61.1		11.4482	61.1
0.000745063	61.2		381.658	61.2		1.94931e-09	61.2		11.4282	61.2
0.000739464	61.3		380.793	61.3		1.93581e-09	61.3		11.4082	61.3
0.000733907	61.4		379.93	61.4		1.92241e-09	61.4		11.3883	61.4
0.00072839	61.5		379.069	61.5		1.90911e-09	61.5		11.3684	61.5
0.000722914	61.6		378.21	61.6		1.8959e-09	61.6		11.3486	61.6
0.000717479	61.7		377.353	61.7		1.8828e-09	61.7		11.3288	61.7
0.000712084	61.8		376.498	61.8		1.86979e-09	61.8		11.3091	61.8
0.000706728	61.9		375.646	61.9		1.85688e-09	61.9		11.2894	61.9
0.000701412	62		374.795	62		1.84406e-09	62		11.2698	62
0.000696135	62.1		373.947	62.1		1.83134e-09	62.1		11.2502	62.1
0.000690897	62.2		373.101	62.2		1.81871e-09	62.2		11.2307	62.2
0.000685698	62.3		372.257	62.3		1.80618e-09	62.3		11.2112	62.3
0.000680537	62.4		371.415	62.4		1.79374e-09	62.4		11.1918	62.4
0.000675415	62.5		370.575	62.5		1.78139e-09	62.5		11.1724	62.5
0.00067033	62.6		369.737	62.6		1.76913e-09	62.6		11.1531	62.6
0.000665283	62.7		368.901	62.7		1.75696e-09	62.7		11.1338	62.7
0.000660273	62.8		368.067	62.8		1.74488e-09	62.8		11.1145	62.8
0.0006553	62.9		367.236	62.9		1.73289e-09	62.9		11.0953	62.9
0.000650364	63		366.406	63		1.72099e-09	63		11.0762	63
0.000645465	63.1		365.578	63.1		1.70918e-09	63.1		11.0571	63.1
0.000640602	63.2		364.753	63.2		1.69745e-09	63.2		11.038	63.2
0.000635775	63.3		363.929	63.3		1.68581e-09	63.3		11.019	63.3
0.000630983	63.4		363.108	63.4		1.67426e-09	63.4		11	63.4
0.000626227	63.5		362.288	63.5		1.66279e-09	63.5		10.9811	63.5
0.000621507	63.6		361.471	63.6		1.6514e-09	63.6		10.9622	63.6
0.000616821	63.7		360.656	63.7		1.6401e-09	63.7		10.9434	63.7
0.00061217	63.8		359.842	63.8		1.62888e-09	63.8		10.9246	63.8
0.000607554	63.9		359.031	63.9		1.61775e-09	63.9		10.9059	63.9
0.000602972	64		358.222	64		1.60669e-09	64		10.8872	64
0.000598424	64.1		357.414	64.1		1.59572e-09	64.1		10.8686	64.1
0.000593909	64.2		356.609	64.2		1.58483e-09	64.2		10.85	64.2
0.000589428	64.3		355.806	64.3		1.57402e-09	64.3		10.8314	64.3
0.000584981	64.4		355.004	64.4		1.56328e-09	64.4		10.8129	64.4
0.000580566	64.5		354.205	64.5		1.55263e-09	64.5		10.7945	64.5
0.000576185	64.6		353.408	64.6		1.54205e-09	64.6		10.7761	64.6
0.000571835	64.7		352.612	64.7		1.53155e-09	64.7		10.7577	64.7
0.000567519	64.8		351.819	64.8		1.52113e-09	64.8		10.7394	64.8
0.000563234	64.9		351.027	64.9		1.51079e-09	64.9		10.7211	64.9
0.000558981	65		350.238	65		1.50052e-09	65		10.7029	65
0.00055476	65.1		349.45	65.1		1.49032e-09	65.1		10.6847	65.1
0.00055057	65.2		348.664	65.2		1.4802e-09	65.2		10.6665	65.2
0.000546412	65.3		347.881	65.3		1.47016e-09	65.3		10.6484	65.3
0.000542284	65.4		347.099	65.4		1.46018e-09	65.4		10.6304	65.4
0.000538187	65.5		346.319	65.5		1.45028e-09	65.5		10.6124	65.5
0.000534121	65.6		345.541	65.6		1.44046e-09	65.6		10.5944	65.6
0.000530085	65.7		344.765	65.7		1.4307e-09	65.7		10.5765	65.7
0.000526079	65.8		343.991	65.8		1.42102e-09	65.8		10.5586	65.8
0.000522103	65.9		343.219	65.9		1.4114e-09	65.9		10.5408	65.9
0.000518157	66		342.449	66		1.40186e-09	66		10.523	66
0.00051424	66.1		341.68	66.1		1.39239e-09	66.1		10.5052	66.1
0.000510352	66.2		340.914	66.2		1.38298e-09	66.2		10.4875	66.2
0.000506493	66.3		340.149	66.3		1.37365e-09	66.3		10.4698	66.3
0.000502663	66.4		339.387	66.4		1.36438e-09	66.4		10.4522	66.4
0.000498862	66.5		338.626	66.5		1.35518e-09	66.5		10.4347	66.5
0.000495089	66.6		337.867	66.6		1.34604e-09	66.6		10.4171	66.6
0.000491344	66.7		337.11	66.7		1.33698e-09	66.7		10.3996	66.7
0.000487627	66.8		336.355	66.8		1.32798e-09	66.8		10.3822	66.8
0.000483938	66.9		335.601	66.9		1.31904e-09	66.9		10.3648	66.9
0.000480277	67		334.85	67		1.31017e-09	67		10.3474	67
0.000476643	67.1		334.1	67.1		1.30136e-09	67.1		10.3301	67.1
0.000473036	67.2		333.353	67.2		1.29262e-09	67.2		10.3128	67.2
0.000469456	67.3		332.607	67.3		1.28394e-09	67.3		10.2956	67.3
0.000465903	67.4		331.863	67.4		1.27533e-09	67.4		10.2784	67.4
0.000462377	67.5		331.121	67.5		1.26678e-09	67.5		10.2612	67.5
0.000458877	67.6		330.38	67.6		1.25828e-09	67.6		10.2441	67.6
0.000455403	67.7		329.642	67.7		1.24985e-09	67.7		10.2271	67.7
0.000451955	67.8		328.905	67.8		1.24149e-09	67.8		10.21	67.8
0.000448533	67.9		328.17	67.9		1.23318e-09	67.9		10.1931	67.9
0.000445137	68		327.437	68		1.22493e-09	68		10.1761	68
0.000441766	68.1		326.706	68.1		1.21674e-09	68.1		10.1592	68.1
0.00043842	68.2		325.976	68.2		1.20862e-09	68.2		10.1424	68.2
0.0004351	68.3		325.249	68.3		1.20055e-09	68.3		10.1255	68.3
0.000431804	68.4		324.523	68.4		1.19254e-09	68.4		10.1088	68.4
0.000428533	68.5		323.799	68.5		1.18458e-09	68.5		10.092	68.5
0.000425287	68.6		323.076	68.6		1.17669e-09	68.6		10.0753	68.6
0.000422065	68.7		322.356	68.7		1.16885e-09	68.7		10.0587	68.7
0.000418867	68.8		321.637	68.8		1.16107e-09	68.8		10.0421	68.8
0.000415693	68.9		320.92	68.9		1.15334e-09	68.9		10.0255	68.9
0.000412543	69		320.205	69		1.14567e-09	69		10.009	69
0.000409417	69.1		319.492	69.1		1.13806e-09	69.1		9.99246	69.1
0.000406314	69.2		318.78	69.2		1.1305e-09	69.2		9.97601	69.2
0.000403234	69.3		318.07	69.3		1.12299e-09	69.3		9.9596	69.3
0.000400178	69.4		317.362	69.4		1.11554e-09	69.4		9.94322	69.4
0.000397144	69.5		316.656	69.5		1.10814e-09	69.5		9.92689	69.5
0.000394134	69.6		315.951	69.6		1.1008e-09	69.6		9.9106	69.6
0.000391146	69.7		315.248	69.7		1.09351e-09	69.7		9.89435	69.7
0.00038818	69.8		314.547	69.8		1.08627e-09	69.8		9.87813	69.8
0.000385237	69.9		313.848	69.9		1.07909e-09	69.9		9.86196	69.9
0.000382316	70		313.15	70		1.07195e-09	70		9.84583	70
0.000379417	70.1		312.454	70.1		1.06487e-09	70.1		9.82973	70.1
0.00037654	70.2		311.76	70.2		1.05783e-09	70.2		9.81368	70.2
0.000373684	70.3		311.067	70.3		1.05085e-09	70.3		9.79766	70.3
0.00037085	70.4		310.376	70.4		1.04392e-09	70.4		9.78168	70.4
0.000368037	70.5		309.687	70.5		1.03704e-09	70.5		9.76574	70.5
0.000365246	70.6		309	70.6		1.03021e-09	70.6		9.74985	70.6
0.000362475	70.7		308.314	70.7		1.02342e-09	70.7		9.73398	70.7
0.000359726	70.8		307.63	70.8		1.01669e-09	70.8		9.71816	70.8
0.000356997	70.9		306.948	70.9		1.01e-09	70.9		9.70238	70.9
0.000354289	71		306.267	71		1.00336e-09	71		9.68663	71
0.000351601	71.1		305.588	71.1		9.96772e-10	71.1		9.67093	71.1
0.000348933	71.2		304.911	71.2		9.90229e-10	71.2		9.65526	71.2
0.000346286	71.3		304.235	71.3		9.83732e-10	71.3		9.63963	71.3
0.000343658	71.4		303.561	71.4		9.77281e-10	71.4		9.62404	71.4
0.00034105	71.5		302.889	71.5		9.70877e-10	71.5		9.60848	71.5
0.000338462	71.6		302.218	71.6		9.64518e-10	71.6		9.59297	71.6
0.000335894	71.7		301.549	71.7		9.58205e-10	71.7		9.57749	71.7
0.000333345	71.8		300.882	71.8		9.51937e-10	71.8		9.56205	71.8
0.000330815	71.9		300.216	71.9		9.45714e-10	71.9		9.54664	71.9
0.000328304	72		299.552	72		9.39535e-10	72		9.53128	72
0.000325812	72.1		298.89	72.1		9.334e-10	72.1		9.51595	72.1
0.00032334	72.2		298.229	72.2		9.27309e-10	72.2		9.50066	72.2
0.000320885	72.3		297.57	72.3		9.21262e-10	72.3		9.4854	72.3
0.00031845	72.4		296.912	72.4		9.15257e-10	72.4		9.47019	72.4
0.000316032	72.5		296.257	72.5		9.09296e-10	72.5		9.45501	72.5
0.000313633	72.6		295.602	72.6		9.03377e-10	72.6		9.43986	72.6
0.000311252	72.7		294.95	72.7		8.975e-10	72.7		9.42476	72.7
0.00030889	72.8		294.299	72.8		8.91664e-10	72.8		9.40969	72.8
0.000306545	72.9		293.649	72.9		8.85871e-10	72.9		9.39466	72.9
0.000304217	73		293.001	73		8.80118e-10	73		9.37966	73
0.000301908	73.1		292.355	73.1		8.74407e-10	73.1		9.3647	73.1
0.000299616	73.2		291.71	73.2		8.68736e-10	73.2		9.34978	73.2
0.000297341	73.3		291.067	73.3		8.63105e-10	73.3		9.33489	73.3
0.000295083	73.4		290.426	73.4		8.57514e-10	73.4		9.32004	73.4
0.000292843	73.5		289.786	73.5		8.51963e-10	73.5		9.30523	73.5
0.000290619	73.6		289.148	73.6		8.46452e-10	73.6		9.29045	73.6
0.000288413	73.7		288.511	73.7		8.40979e-10	73.7		9.27571	73.7
0.000286223	73.8		287.876	73.8		8.35545e-10	73.8		9.261	73.8
0.000284049	73.9		287.242	73.9		8.3015e-10	73.9		9.24633	73.9
0.000281892	74		286.61	74		8.24793e-10	74		9.23169	74
0.000279752	74.1		285.98	74.1		8.19474e-10	74.1		9.21709	74.1
0.000277628	74.2		285.351	74.2		8.14193e-10	74.2		9.20253	74.2
0.000275519	74.3		284.724	74.3		8.08948e-10	74.3		9.188	74.3
0.000273427	74.4		284.098	74.4		8.03741e-10	74.4		9.17351	74.4
0.000271351	74.5		283.473	74.5		7.98571e-10	74.5		9.15905	74.5
0.00026929	74.6		282.851	74.6		7.93438e-10	74.6		9.14462	74.6
0.000267245	74.7		282.23	74.7		7.8834e-10	74.7		9.13024	74.7
0.000265216	74.8		281.61	74.8		7.83279e-10	74.8		9.11588	74.8
0.000263202	74.9		280.992	74.9		7.78253e-10	74.9		9.10156	74.9
0.000261203	75		280.375	75		7.73263e-10	75		9.08728	75
0.000259219	75.1		279.76	75.1		7.68308e-10	75.1		9.07303	75.1
0.000257251	75.2		279.147	75.2		7.63387e-10	75.2		9.05882	75.2
0.000255297	75.3		278.535	75.3		7.58502e-10	75.3		9.04464	75.3
0.000253359	75.4		277.924	75.4		7.53651e-10	75.4		9.03049	75.4
0.000251435	75.5		277.315	75.5		7.48834e-10	75.5		9.01638	75.5
0.000249525	75.6		276.707	75.6		7.44051e-10	75.6		9.0023	75.6
0.00024763	75.7		276.101	75.7		7.39301e-10	75.7		8.98826	75.7
0.00024575	75.8		275.497	75.8		7.34585e-10	75.8		8.97425	75.8
0.000243884	75.9		274.894	75.9		7.29902e-10	75.9		8.96028	75.9
0.000242032	76		274.292	76		7.25252e-10	76		8.94634	76
0.000240194	76.1		273.692	76.1		7.20635e-10	76.1		8.93243	76.1
0.00023837	76.2		273.094	76.2		7.1605e-10	76.2		8.91855	76.2
0.00023656	76.3		272.496	76.3		7.11497e-10	76.3		8.90472	76.3
0.000234763	76.4		271.901	76.4		7.06977e-10	76.4		8.89091	76.4
0.00023298	76.5		271.307	76.5		7.02487e-10	76.5		8.87714	76.5
0.000231211	76.6		270.714	76.6		6.9803e-10	76.6		8.8634	76.6
0.000229456	76.7		270.123	76.7		6.93603e-10	76.7		8.84969	76.7
0.000227713	76.8		269.533	76.8		6.89208e-10	76.8		8.83602	76.8
0.000225984	76.9		268.945	76.9		6.84843e-10	76.9		8.82238	76.9
0.000224268	77		268.358	77		6.80509e-10	77		8.80877	77
0.000222566	77.1		267.772	77.1		6.76205e-10	77.1		8.7952	77.1
0.000220876	77.2		267.188	77.2		6.71931e-10	77.2		8.78166	77.2
0.000219199	77.3		266.606	77.3		6.67687e-10	77.3		8.76815	77.3
0.000217534	77.4		266.025	77.4		6.63473e-10	77.4		8.75467	77.4
0.000215883	77.5		265.445	77.5		6.59288e-10	77.5		8.74123	77.5
0.000214244	77.6		264.867	77.6		6.55132e-10	77.6		8.72782	77.6
0.000212617	77.7		264.29	77.7		6.51005e-10	77.7		8.71444	77.7
0.000211003	77.8		263.714	77.8		6.46907e-10	77.8		8.7011	77.8
0.000209401	77.9		263.14	77.9		6.42838e-10	77.9		8.68778	77.9
0.000207812	78		262.568	78		6.38797e-10	78		8.6745	78
0.000206234	78.1		261.997	78.1		6.34784e-10	78.1		8.66126	78.1
0.000204669	78.2		261.427	78.2		6.30798e-10	78.2		8.64804	78.2
0.000203115	78.3		260.859	78.3		6.26841e-10	78.3		8.63485	78.3
0.000201574	78.4		260.292	78.4		6.22911e-10	78.4		8.6217	78.4
0.000200044	78.5		259.726	78.5		6.19009e-10	78.5		8.60858	78.5
0.000198525	78.6		259.162	78.6		6.15133e-10	78.6		8.59549	78.6
0.000197019	78.7		258.599	78.7		6.11285e-10	78.7		8.58243	78.7
0.000195523	78.8		258.038	78.8		6.07463e-10	78.8		8.56941	78.8
0.00019404	78.9		257.478	78.9		6.03668e-10	78.9		8.55641	78.9
0.000192567	79		256.919	79		5.99899e-10	79		8.54345	79
0.000191106	79.1		256.362	79.1		5.96156e-10	79.1		8.53052	79.1
0.000189656	79.2		255.806	79.2		5.92439e-10	79.2		8.51762	79.2
0.000188217	79.3		255.252	79.3		5.88747e-10	79.3		8.50475	79.3
0.000186788	79.4		254.698	79.4		5.85082e-10	79.4		8.49191	79.4
0.000185371	79.5		254.147	79.5		5.81441e-10	79.5		8.4791	79.5
0.000183965	79.6		253.596	79.6		5.77826e-10	79.6		8.46633	79.6
0.000182569	79.7		253.047	79.7		5.74236e-10	79.7		8.45358	79.7
0.000181184	79.8		252.499	79.8		5.70671e-10	79.8		8.44087	79.8
0.00017981	79.9		251.953	79.9		5.6713e-10	79.9		8.42819	79.9
0.000178446	80		251.408	80		5.63613e-10	80		8.41553	80
0.000177092	80.1		250.864	80.1		5.60121e-10	80.1		8.40291	80.1
0.000175749	80.2		250.322	80.2		5.56653e-10	80.2		8.39032	80.2
0.000174416	80.3		249.781	80.3		5.53209e-10	80.3		8.37776	80.3
0.000173094	80.4		249.242	80.4		5.49789e-10	80.4		8.36522	80.4
0.000171781	80.5		248.703	80.5		5.46392e-10	80.5		8.35272	80.5
0.000170478	80.6		248.166	80.6		5.43019e-10	80.6		8.34025	80.6
0.000169186	80.7		247.631	80.7		5.39668e-10	80.7		8.32781	80.7
0.000167903	80.8		247.096	80.8		5.36341e-10	80.8		8.3154	80.8
0.00016663	80.9		246.563	80.9		5.33037e-10	80.9		8.30302	80.9
0.000165367	81		246.031	81		5.29755e-10	81		8.29067	81
0.000164113	81.1		245.501	81.1		5.26496e-10	81.1		8.27835	81.1
0.000162869	81.2		244.972	81.2		5.23259e-10	81.2		8.26606	81.2
0.000161635	81.3		244.444	81.3		5.20045e-10	81.3		8.25379	81.3
0.000160409	81.4		243.918	81.4		5.16852e-10	81.4		8.24156	81.4
0.000159194	81.5		243.392	81.5		5.13682e-10	81.5		8.22936	81.5
0.000157987	81.6		242.869	81.6		5.10533e-10	81.6		8.21719	81.6
0.00015679	81.7		242.346	81.7		5.07405e-10	81.7		8.20504	81.7
0.000155602	81.8		241.825	81.8		5.04299e-10	81.8		8.19293	81.8
0.000154423	81.9		241.304	81.9		5.01215e-10	81.9		8.18084	81.9
0.000153253	82		240.786	82		4.98151e-10	82		8.16879	82
0.000152092	82.1		240.268	82.1		4.95108e-10	82.1		8.15676	82.1
0.00015094	82.2		239.752	82.2		4.92086e-10	82.2		8.14476	82.2
0.000149797	82.3		239.237	82.3		4.89085e-10	82.3		8.13279	82.3
0.000148662	82.4		238.723	82.4		4.86104e-10	82.4		8.12085	82.4
0.000147536	82.5		238.211	82.5		4.83144e-10	82.5		8.10894	82.5
0.000146419	82.6		237.7	82.6		4.80204e-10	82.6		8.09705	82.6
0.00014531	82.7		237.19	82.7		4.77283e-10	82.7		8.0852	82.7
0.00014421	82.8		236.681	82.8		4.74383e-10	82.8		8.07337	82.8
0.000143118	82.9		236.174	82.9		4.71502e-10	82.9		8.06158	82.9
0.000142035	83		235.668	83		4.68641e-10	83		8.04981	83
0.00014096	83.1		235.163	83.1		4.658e-10	83.1		8.03807	83.1
0.000139893	83.2		234.659	83.2		4.62978e-10	83.2		8.02635	83.2
0.000138834	83.3		234.157	83.3		4.60175e-10	83.3		8.01467	83.3
0.000137783	83.4		233.656	83.4		4.57391e-10	83.4		8.00301	83.4
0.000136741	83.5		233.156	83.5		4.54625e-10	83.5		7.99139	83.5
0.000135706	83.6		232.657	83.6		4.51879e-10	83.6		7.97979	83.6
0.000134679	83.7		232.16	83.7		4.49151e-10	83.7		7.96821	83.7
0.00013366	83.8		231.663	83.8		4.46442e-10	83.8		7.95667	83.8
0.000132649	83.9		231.168	83.9		4.43751e-10	83.9		7.94515	83.9
0.000131646	84		230.674	84		4.41078e-10	84		7.93366	84
0.00013065	84.1		230.182	84.1		4.38424e-10	84.1		7.9222	84.1
0.000129662	84.2		229.69	84.2		4.35787e-10	84.2		7.91077	84.2
0.000128682	84.3		229.2	84.3		4.33168e-10	84.3		7.89936	84.3
0.000127709	84.4		228.711	84.4		4.30567e-10	84.4		7.88798	84.4
0.000126743	84.5		228.224	84.5		4.27984e-10	84.5		7.87663	84.5
0.000125785	84.6		227.737	84.6		4.25418e-10	84.6		7.86531	84.6
0.000124834	84.7		227.252	84.7		4.22869e-10	84.7		7.85401	84.7
0.000123891	84.8		226.767	84.8		4.20337e-10	84.8		7.84274	84.8
0.000122954	84.9		226.285	84.9		4.17823e-10	84.9		7.8315	84.9
0.000122025	85		225.803	85		4.15325e-10	85		7.82028	85
0.000121103	85.1		225.322	85.1		4.12844e-10	85.1		7.80909	85.1
0.000120188	85.2		224.843	85.2		4.1038e-10	85.2		7.79793	85.2
0.000119281	85.3		224.364	85.3		4.07933e-10	85.3		7.78679	85.3
0.00011838	85.4		223.887	85.4		4.05502e-10	85.4		7.77568	85.4
0.000117485	85.5		223.411	85.5		4.03087e-10	85.5		7.7646	85.5
0.000116598	85.6		222.937	85.6		4.00689e-10	85.6		7.75355	85.6
0.000115718	85.7		222.463	85.7		3.98306e-10	85.7		7.74252	85.7
0.000114844	85.8		221.991	85.8		3.9594e-10	85.8		7.73152	85.8
0.000113977	85.9		221.52	85.9		3.93589e-10	85.9		7.72054	85.9
0.000113117	86		221.05	86		3.91254e-10	86		7.70959	86
0.000112263	86.1		220.581	86.1		3.88935e-10	86.1		7.69867	86.1
0.000111416	86.2		220.113	86.2		3.86632e-10	86.2		7.68777	86.2
0.000110575	86.3		219.646	86.3		3.84344e-10	86.3		7.6769	86.3
0.000109741	86.4		219.181	86.4		3.82071e-10	86.4		7.66605	86.4
0.000108913	86.5		218.716	86.5		3.79813e-10	86.5		7.65523	86.5
0.000108092	86.6		218.253	86.6		3.7757e-10	86.6		7.64444	86.6
0.000107276	86.7		217.791	86.7		3.75343e-10	86.7		7.63367	86.7
0.000106467	86.8		217.33	86.8		3.7313e-10	86.8		7.62293	86.8
0.000105665	86.9		216.871	86.9		3.70932e-10	86.9		7.61222	86.9
0.000104868	87		216.412	87		3.68749e-10	87		7.60153	87
0.000104077	87.1		215.954	87.1		3.6658e-10	87.1		7.59086	87.1
0.000103293	87.2		215.498	87.2		3.64426e-10	87.2		7.58022	87.2
0.000102514	87.3		215.043	87.3		3.62286e-10	87.3		7.56961	87.3
0.000101742	87.4		214.589	87.4		3.6016e-10	87.4		7.55902	87.4
0.000100975	87.5		214.136	87.5		3.58049e-10	87.5		7.54846	87.5
0.000100215	87.6		213.684	87.6		3.55951e-10	87.6		7.53792	87.6
9.94597e-05	87.7		213.233	87.7		3.53868e-10	87.7		7.52741	87.7
9.87107e-05	87.8		212.783	87.8		3.51798e-10	87.8		7.51692	87.8
9.79673e-05	87.9		212.335	87.9		3.49742e-10	87.9		7.50646	87.9
9.72297e-05	88		211.887	88		3.47699e-10	88		7.49602	88
9.64977e-05	88.1		211.441	88.1		3.45671e-10	88.1		7.48561	88.1
9.57713e-05	88.2		210.996	88.2		3.43655e-10	88.2		7.47522	88.2
9.50505e-05	88.3		210.551	88.3		3.41653e-10	88.3		7.46486	88.3
9.43352e-05	88.4		210.108	88.4		3.39664e-10	88.4		7.45452	88.4
9.36254e-05	88.5		209.666	88.5		3.37689e-10	88.5		7.44421	88.5
9.2921e-05	88.6		209.225	88.6		3.35726e-10	88.6		7.43392	88.6
9.2222e-05	88.7		208.786	88.7		3.33777e-10	88.7		7.42366	88.7
9.15284e-05	88.8		208.347	88.8		3.3184e-10	88.8		7.41342	88.8
9.08401e-05	88.9		207.909	88.9		3.29916e-10	88.9		7.40321	88.9
9.01571e-05	89		207.473	89		3.28005e-10	89		7.39302	89
8.94793e-05	89.1		207.037	89.1		3.26106e-10	89.1		7.38285	89.1
8.88067e-05	89.2		206.603	89.2		3.2422e-10	89.2		7.37271	89.2
8.81393e-05	89.3		206.169	89.3		3.22346e-10	89.3		7.36259	89.3
8.74769e-05	89.4		205.737	89.4		3.20485e-10	89.4		7.3525	89.4
8.68197e-05	89.5		205.306	89.5		3.18636e-10	89.5		7.34243	89.5
8.61675e-05	89.6		204.875	89.6		3.16799e-10	89.6		7.33239	89.6
8.55203e-05	89.7		204.446	89.7		3.14974e-10	89.7		7.32236	89.7
8.4878e-05	89.8		204.018	89.8		3.13162e-10	89.8		7.31237	89.8
8.42407e-05	89.9		203.591	89.9		3.11361e-10	89.9		7.30239	89.9
8.36082e-05	90		203.165	90		3.09572e-10	90		7.29244	90
8.29806e-05	90.1		202.74	90.1		3.07794e-10	90.1		7.28252	90.1
8.23579e-05	90.2		202.316	90.2		3.06028e-10	90.2		7.27262	90.2
8.17398e-05	90.3		201.894	90.3		3.04274e-10	90.3		7.26274	90.3
8.11266e-05	90.4		201.472	90.4		3.02532e-10	90.4		7.25288	90.4
8.0518e-05	90.5		201.051	90.5		3.008e-10	90.5		7.24305	90.5
7.99141e-05	90.6		200.631	90.6		2.99081e-10	90.6		7.23324	90.6
7.93148e-05	90.7		200.212	90.7		2.97372e-10	90.7		7.22346	90.7
7.87201e-05	90.8		199.795	90.8		2.95674e-10	90.8		7.2137	90.8
7.813e-05	90.9		199.378	90.9		2.93988e-10	90.9		7.20396	90.9
7.75443e-05	91		198.962	91		2.92313e-10	91		7.19425	91
7.69632e-05	91.1		198.548	91.1		2.90648e-10	91.1		7.18455	91.1
7.63865e-05	91.2		198.134	91.2		2.88995e-10	91.2		7.17489	91.2
7.58143e-05	91.3		197.722	91.3		2.87352e-10	91.3		7.16524	91.3
7.52464e-05	91.4		197.31	91.4		2.8572e-10	91.4		7.15562	91.4
7.46829e-05	91.5		196.9	91.5		2.84098e-10	91.5		7.14602	91.5
7.41237e-05	91.6		196.49	91.6		2.82487e-10	91.6		7.13644	91.6
7.35688e-05	91.7		196.081	91.7		2.80887e-10	91.7		7.12689	91.7
7.30181e-05	91.8		195.674	91.8		2.79297e-10	91.8		7.11736	91.8
7.24716e-05	91.9		195.267	91.9		2.77717e-10	91.9		7.10785	91.9
7.19294e-05	92		194.862	92		2.76147e-10	92		7.09836	92
7.13913e-05	92.1		194.457	92.1		2.74588e-10	92.1		7.0889	92.1
7.08573e-05	92.2		194.054	92.2		2.73039e-10	92.2		7.07946	92.2
7.03274e-05	92.3		193.651	92.3		2.715e-10	92.3		7.07004	92.3
6.98015e-05	92.4		193.25	92.4		2.69971e-10	92.4		7.06064	92.4
6.92797e-05	92.5		192.849	92.5		2.68451e-10	92.5		7.05127	92.5
6.87619e-05	92.6		192.449	92.6		2.66942e-10	92.6		7.04192	92.6
6.82481e-05	92.7		192.051	92.7		2.65442e-10	92.7		7.03259	92.7
6.77381e-05	92.8		191.653	92.8		2.63952e-10	92.8		7.02328	92.8
6.72321e-05	92.9		191.257	92.9		2.62472e-10	92.9		7.014	92.9
6.673e-05	93		190.861	93		2.61001e-10	93		7.00474	93
6.62317e-05	93.1		190.466	93.1		2.5954e-10	93.1		6.99549	93.1
6.57372e-05	93.2		190.072	93.2		2.58088e-10	93.2		6.98628	93.2
6.52465e-05	93.3		189.68	93.3		2.56645e-10	93.3		6.97708	93.3
6.47596e-05	93.4		189.288	93.4		2.55212e-10	93.4		6.9679	93.4
6.42764e-05	93.5		188.897	93.5		2.53788e-10	93.5		6.95875	93.5
6.37969e-05	93.6		188.507	93.6		2.52373e-10	93.6		6.94962	93.6
6.33211e-05	93.7		188.118	93.7		2.50968e-10	93.7		6.94051	93.7
6.28489e-05	93.8		187.73	93.8		2.49571e-10	93.8		6.93142	93.8
6.23803e-05	93.9		187.343	93.9		2.48183e-10	93.9		6.92235	93.9
6.19153e-05	94		186.957	94		2.46804e-10	94		6.91331	94
6.14539e-05	94.1		186.572	94.1		2.45435e-10	94.1		6.90429	94.1
6.0996e-05	94.2		186.188	94.2		2.44073e-10	94.2		6.89528	94.2
6.05416e-05	94.3		185.804	94.3		2.42721e-10	94.3		6.8863	94.3
6.00906e-05	94.4		185.422	94.4		2.41377e-10	94.4		6.87734	94.4
5.96432e-05	94.5		185.041	94.5		2.40042e-10	94.5		6.8684	94.5
5.91991e-05	94.6		184.66	94.6		2.38715e-10	94.6		6.85949	94.6
5.87585e-05	94.7		184.281	94.7		2.37397e-10	94.7		6.85059	94.7
5.83212e-05	94.8		183.902	94.8		2.36087e-10	94.8		6.84172	94.8
5.78873e-05	94.9		183.525	94.9		2.34786e-10	94.9		6.83286	94.9
5.74567e-05	95		183.148	95		2.33493e-10	95		6.82403	95
5.70293e-05	95.1		182.772	95.1		2.32208e-10	95.1		6.81522	95.1
5.66053e-05	95.2		182.397	95.2		2.30931e-10	95.2		6.80643	95.2
5.61845e-05	95.3		182.023	95.3		2.29663e-10	95.3		6.79765	95.3
5.57669e-05	95.4		181.65	95.4		2.28403e-10	95.4		6.7889	95.4
5.53525e-05	95.5		181.278	95.5		2.2715e-10	95.5		6.78018	95.5
5.49413e-05	95.6		180.907	95.6		2.25906e-10	95.6		6.77147	95.6
5.45332e-05	95.7		180.537	95.7		2.24669e-10	95.7		6.76278	95.7
5.41282e-05	95.8		180.167	95.8		2.23441e-10	95.8		6.75411	95.8
5.37264e-05	95.9		179.799	95.9		2.2222e-10	95.9		6.74547	95.9
5.33276e-05	96		179.431	96		2.21007e-10	96		6.73684	96
5.29318e-05	96.1		179.065	96.1		2.19801e-10	96.1		6.72823	96.1
5.25391e-05	96.2		178.699	96.2		2.18604e-10	96.2		6.71965	96.2
5.21494e-05	96.3		178.334	96.3		2.17413e-10	96.3		6.71108	96.3
5.17626e-05	96.4		177.97	96.4		2.16231e-10	96.4		6.70254	96.4
5.13788e-05	96.5		177.607	96.5		2.15056e-10	96.5		6.69401	96.5
5.0998e-05	96.6		177.245	96.6		2.13888e-10	96.6		6.68551	96.6
5.062e-05	96.7		176.883	96.7		2.12727e-10	96.7		6.67702	96.7
5.0245e-05	96.8		176.523	96.8		2.11574e-10	96.8		6.66856	96.8
4.98728e-05	96.9		176.163	96.9		2.10429e-10	96.9		6.66012	96.9
4.95034e-05	97		175.805	97		2.0929e-10	97		6.65169	97
4.91369e-05	97.1		175.447	97.1		2.08159e-10	97.1		6.64329	97.1
4.87732e-05	97.2		175.09	97.2		2.07035e-10	97.2		6.6349	97.2
4.84122e-05	97.3		174.734	97.3		2.05918e-10	97.3		6.62654	97.3
4.8054e-05	97.4		174.379	97.4		2.04807e-10	97.4		6.61819	97.4
4.76986e-05	97.5		174.025	97.5		2.03704e-10	97.5		6.60987	97.5
4.73458e-05	97.6		173.671	97.6		2.02608e-10	97.6		6.60156	97.6
4.69958e-05	97.7		173.319	97.7		2.01519e-10	97.7		6.59327	97.7
4.66484e-05	97.8		172.967	97.8		2.00437e-10	97.8		6.58501	97.8
4.63037e-05	97.9		172.616	97.9		1.99361e-10	97.9		6.57676	97.9
4.59616e-05	98		172.266	98		1.98292e-10	98		6.56853	98
4.56221e-05	98.1		171.917	98.1		1.9723e-10	98.1		6.56032	98.1
4.52852e-05	98.2		171.569	98.2		1.96174e-10	98.2		6.55213	98.2
4.49509e-05	98.3		171.221	98.3		1.95125e-10	98.3		6.54396	98.3
4.46191e-05	98.4		170.875	98.4		1.94083e-10	98.4		6.53581	98.4
4.42898e-05	98.5		170.529	98.5		1.93047e-10	98.5		6.52768	98.5
4.39631e-05	98.6		170.184	98.6		1.92018e-10	98.6		6.51957	98.6
4.36389e-05	98.7		169.84	98.7		1.90995e-10	98.7		6.51148	98.7
4.33171e-05	98.8		169.497	98.8		1.89978e-10	98.8		6.5034	98.8
4.29978e-05	98.9		169.155	98.9		1.88968e-10	98.9		6.49535	98.9
4.26809e-05	99		168.813	99		1.87964e-10	99		6.48731	99
4.23664e-05	99.1		168.473	99.1		1.86966e-10	99.1		6.4793	99.1
4.20544e-05	99.2		168.133	99.2		1.85975e-10	99.2		6.4713	99.2
4.17447e-05	99.3		167.794	99.3		1.8499e-10	99.3		6.46332	99.3
4.14373e-05	99.4		167.456	99.4		1.8401e-10	99.4		6.45536	99.4
4.11324e-05	99.5		167.118	99.5		1.83037e-10	99.5		6.44741	99.5
4.08297e-05	99.6		166.782	99.6		1.8207e-10	99.6		6.43949	99.6
4.05293e-05	99.7		166.446	99.7		1.81109e-10	99.7		6.43159	99.7
[truncated: 1,503 more rows]
